# Supplementary material for: Flavonoids Modulate the Accumulation of Toxins From Aspergillus flavus in Maize Kernels
Source: Front Plant Sci. 2021 Nov 26;12:761446. doi: 10.3389/fpls.2021.761446 (PMC8662736; doi:10.3389/fpls.2021.761446)
Supplement: Supplementary file 1 [file Table_2.XLSX]

## Sheet: Full list
Supplemental table 2. List of candidate genes with 2 standard deviations from the RDA axis 1 and 2 and the cellular component GO results.
GENE axis load	in	g	IDa
Zm00001d002768	1	187.208	GRMZM2G337229
Zm00001d003157	1	-17.8152	GRMZM2G154397
Zm00001d003190	1	-113.518	GRMZM2G051943
Zm00001d003247	1	-36.2867	GRMZM2G102183
Zm00001d003801	1	23.0159	AC191050.3_FG003
Zm00001d003938	1	22.0451	GRMZM2G108338
Zm00001d005890	1	-50.4546	GRMZM2G138468
Zm00001d006008	1	87.8121	GRMZM2G112165
Zm00001d006796	1	85.5872	GRMZM2G339994
Zm00001d007411	1	95.5425	GRMZM2G166776
Zm00001d007753	1	-17.1031	GRMZM2G053206
Zm00001d008268	1	36.6908	GRMZM2G013461
Zm00001d009296	1	-18.7805	AC205274.3_FG001
Zm00001d009382	1	31.2123	GRMZM2G050607
Zm00001d009700	1	34.6492	GRMZM2G045664
Zm00001d012068	1	-21.3807	GRMZM2G030717
Zm00001d012120	1	-43.4497	GRMZM2G035045
Zm00001d012420	1	20.0354	GRMZM2G310431
Zm00001d013384	1	51.8148	GRMZM2G104332
Zm00001d013494	1	67.222	AC206941.2_FG002
Zm00001d013956	1	31.2405	GRMZM2G305446
Zm00001d014258	1	-18.5327	GRMZM2G088028
Zm00001d014258	1	-18.5327	GRMZM2G088064
Zm00001d014258	1	-18.5327	GRMZM2G088018
Zm00001d015327	1	44.6641	GRMZM2G409726
Zm00001d016070	1	45.2398	GRMZM2G063162
Zm00001d016128	1	37.4706	GRMZM2G412436
Zm00001d016469	1	44.8201	GRMZM2G120918
Zm00001d016694	1	26.5679	GRMZM2G038536
Zm00001d017120	1	19.1013	GRMZM2G031496
Zm00001d017121	1	-34.3349	GRMZM2G176307
Zm00001d017274	1	-19.6394	GRMZM2G074604
Zm00001d017399	1	24.8359	GRMZM2G463291
Zm00001d018159	1	-23.3177	GRMZM2G103055
Zm00001d018370	1	-20.6904	GRMZM2G178958
Zm00001d018966	1	-33.8172	GRMZM2G162359
Zm00001d019163	1	-105.14	GRMZM2G340656
Zm00001d019504	1	77.9494	GRMZM2G154747
Zm00001d020590	1	21.2817	GRMZM2G117230
Zm00001d020898	1	65.2991	GRMZM2G069651
Zm00001d020910	1	-19.2508	GRMZM2G181371
Zm00001d021046	1	33.0639	GRMZM2G143955
Zm00001d021299	1	-18.1779	GRMZM2G109405
Zm00001d021615	1	-25.4255	GRMZM2G108849
Zm00001d021666	1	-39.2337	GRMZM2G056369
Zm00001d021668	1	168.358	GRMZM5G835323
Zm00001d022204	1	20.0072	GRMZM2G140293
Zm00001d022278	1	51.1526	GRMZM2G129761
Zm00001d022303	1	17.3401	GRMZM2G006119
Zm00001d022376	1	33.6231	GRMZM2G133275
Zm00001d022421	1	-22.445	GRMZM2G469380
Zm00001d022513	1	26.677	GRMZM2G439201
Zm00001d022516	1	-19.4727	GRMZM2G410766
Zm00001d023343	1	-24.3421	GRMZM2G101958
Zm00001d024210	1	-21.8193	GRMZM2G127087
Zm00001d024302	1	90.5578	GRMZM2G368861
Zm00001d024303	1	168.06	GRMZM2G368890
Zm00001d024414	1	23.8493	GRMZM2G448627
Zm00001d024711	1	-19.8894	GRMZM2G439268
Zm00001d024996	1	-24.456	GRMZM2G075315
Zm00001d025434	1	32.5459	GRMZM2G072322
Zm00001d025757	1	51.4214	GRMZM2G105004
Zm00001d026037	1	71.0363	GRMZM2G473960
Zm00001d027258	1	39.7585	GRMZM2G333069
Zm00001d027619	1	29.1776	GRMZM2G450125
Zm00001d027740	1	118.137	GRMZM2G472236
Zm00001d027832	1	86.4443	GRMZM2G063287
Zm00001d028555	1	16.6061	AC208204.3_FG006
Zm00001d028814	1	-31.6276	GRMZM2G112538
Zm00001d028815	1	-20.326	GRMZM2G112524
Zm00001d029349	1	19.3389	GRMZM2G017670
Zm00001d029778	1	270.228	GRMZM2G402564
Zm00001d030725	1	51.1237	GRMZM2G056039
Zm00001d031128	1	-61.5542	GRMZM2G149751
Zm00001d031158	1	-35.0716	GRMZM2G402631
Zm00001d031168	1	-37.1206	GRMZM2G080603
Zm00001d031228	1	28.8727	GRMZM2G169535
Zm00001d031332	1	16.6493	GRMZM2G024668
Zm00001d032083	1	-17.7826	GRMZM2G059465
Zm00001d033210	1	55.4496	GRMZM2G364069
Zm00001d033447	1	149.433	GRMZM2G067919
Zm00001d033612	1	27.0529	GRMZM2G480954
Zm00001d033931	1	-40.3966	GRMZM2G442658
Zm00001d034002	1	54.5609	GRMZM2G025857
Zm00001d034027	1	35.7714	GRMZM2G145974
Zm00001d034388	1	23.6154	GRMZM2G141473
Zm00001d034413	1	110.964	GRMZM2G026703
Zm00001d034601	1	19.1332	GRMZM2G347043
Zm00001d035000	1	83.1599	GRMZM2G122357
Zm00001d035662	1	-28.7888	GRMZM2G130173
Zm00001d036971	1	18.2552	GRMZM2G159744
Zm00001d037453	1	16.487	GRMZM2G142409
Zm00001d037656	1	-19.0486	GRMZM2G447795
Zm00001d037894	1	402.499	GRMZM2G079440
Zm00001d037985	1	60.0966	GRMZM2G162659
Zm00001d037988	1	431.88	AC233879.1_FG002
Zm00001d038163	1	-18.9343	GRMZM2G306345
Zm00001d038449	1	32.7964	GRMZM2G169943
Zm00001d038449	1	32.7964	GRMZM2G468535
Zm00001d038870	1	50.0343	GRMZM2G096475
Zm00001d038999	1	27.1631	GRMZM2G038284
Zm00001d039518	1	20.3303	GRMZM2G093050
Zm00001d039914	1	36.2846	GRMZM2G161154
Zm00001d039933	1	96.1723	GRMZM2G437100
Zm00001d040292	1	-15.9225	GRMZM2G472248
Zm00001d040613	1	23.647	GRMZM2G103771
Zm00001d040697	1	-32.2603	AC199526.5_FG002
Zm00001d042140	1	-24.3391	GRMZM2G125032
Zm00001d042446	1	-57.3804	AC209810.3_FG002
Zm00001d042453	1	-36.1544	GRMZM2G057823
Zm00001d043121	1	-32.3256	GRMZM2G092474
Zm00001d043382	1	-34.9824	GRMZM2G094712
Zm00001d043464	1	20.8159	GRMZM2G043521
Zm00001d043730	1	42.4465	GRMZM6G186438
Zm00001d043757	1	17.9538	GRMZM2G157317
Zm00001d044608	1	21.4926	GRMZM2G093175
Zm00001d045391	1	-19.8575	GRMZM2G147399
Zm00001d045431	1	-35.765	GRMZM2G064302
Zm00001d045478	1	22.7609	GRMZM2G069911
Zm00001d045988	1	35.9166	GRMZM2G410152
Zm00001d046767	1	40.3297	GRMZM5G836222
Zm00001d047253	1	-18.52	GRMZM2G152908
Zm00001d047799	1	30.189	GRMZM2G366532
Zm00001d048176	1	45.9388	GRMZM2G078441
Zm00001d048348	1	85.0723	GRMZM2G428040
Zm00001d048424	1	31.8391	GRMZM2G330019
Zm00001d048634	1	-15.871	GRMZM6G617209
Zm00001d048947	1	-36.1866	GRMZM2G117989
Zm00001d048948	1	-21.8676	GRMZM2G419675
Zm00001d048948	1	-21.8676	GRMZM2G454556
Zm00001d048949	1	-21.7538	GRMZM2G117971
Zm00001d049239	1	-27.6631	GRMZM2G015295
Zm00001d049409	1	-32.1156	GRMZM2G020801
Zm00001d051459	1	50.7028	GRMZM2G044627
Zm00001d052958	1	44.179	GRMZM2G325118
Zm00001d002768	2	18.6062	GRMZM2G337229
Zm00001d003157	2	23.7715	GRMZM2G154397
Zm00001d003190	2	236.082	GRMZM2G051943
Zm00001d003191	2	12.2614	GRMZM2G122708
Zm00001d003191	2	12.2614	GRMZM2G052175
Zm00001d003247	2	18.2684	GRMZM2G102183
Zm00001d005890	2	27.4648	GRMZM2G138468
Zm00001d006010	2	7.56729	GRMZM2G080466
Zm00001d006364	2	8.63479	GRMZM2G146745
Zm00001d006796	2	11.0065	GRMZM2G339994
Zm00001d007411	2	7.99487	GRMZM2G166776
Zm00001d007753	2	21.9583	GRMZM2G053206
Zm00001d008268	2	12.8456	GRMZM2G013461
Zm00001d008620	2	74.7627	GRMZM2G052869
Zm00001d008795	2	7.35428	GRMZM2G095280
Zm00001d009146	2	11.2267	GRMZM2G054123
Zm00001d009296	2	28.2696	AC205274.3_FG001
Zm00001d009382	2	13.9668	GRMZM2G050607
Zm00001d010588	2	8.58798	AC197705.4_FG001
Zm00001d010920	2	12.2947	GRMZM2G117198
Zm00001d011080	2	11.8618	GRMZM2G028393
Zm00001d011183	2	12.5392	GRMZM2G018375
Zm00001d011208	2	11.2387	GRMZM2G013448
Zm00001d011755	2	7.14653	GRMZM2G107570
Zm00001d012068	2	27.2174	GRMZM2G030717
Zm00001d012103	2	12.2031	GRMZM2G066024
Zm00001d012120	2	-31.5658	GRMZM2G035045
Zm00001d012675	2	19.384	GRMZM2G116273
Zm00001d013384	2	12.5421	GRMZM2G104332
Zm00001d013402	2	-11.3201	GRMZM2G181028
Zm00001d013568	2	-9.64696	GRMZM2G165901
Zm00001d013934	2	8.42006	GRMZM2G032910
Zm00001d014954	2	19.9195	GRMZM2G075624
Zm00001d015376	2	12.7467	GRMZM2G382914
Zm00001d016070	2	-7.64068	GRMZM2G063162
Zm00001d016469	2	-14.7014	GRMZM2G120918
Zm00001d017033	2	10.0405	GRMZM2G122276
Zm00001d017121	2	11.1856	GRMZM2G176307
Zm00001d017152	2	17.1727	GRMZM2G129189
Zm00001d017271	2	7.74637	GRMZM2G540538
Zm00001d017274	2	22.247	GRMZM2G074604
Zm00001d017381	2	8.78477	GRMZM2G170017
Zm00001d017425	2	11.6187	GRMZM2G135385
Zm00001d018159	2	-6.80828	GRMZM2G103055
Zm00001d018738	2	15.0102	GRMZM2G465226
Zm00001d018966	2	51.3788	GRMZM2G162359
Zm00001d019078	2	12.251	GRMZM2G028129
Zm00001d019100	2	-9.7059	GRMZM2G170044
Zm00001d019504	2	7.9221	GRMZM2G154747
Zm00001d020780	2	10.1287	GRMZM2G416632
Zm00001d020910	2	20.0323	GRMZM2G181371
Zm00001d021046	2	7.81457	GRMZM2G143955
Zm00001d021119	2	9.37745	GRMZM2G108133
Zm00001d021615	2	-15.0764	GRMZM2G108849
Zm00001d021666	2	-12.1442	GRMZM2G056369
Zm00001d021668	2	50.9838	GRMZM5G835323
Zm00001d021702	2	10.1033	GRMZM2G058310
Zm00001d021901	2	27.0219	GRMZM2G374971
Zm00001d022089	2	9.74009	GRMZM2G157505
Zm00001d022134	2	23.8004	GRMZM2G031545
Zm00001d022181	2	11.1192	GRMZM2G117707
Zm00001d022277	2	9.37509	GRMZM2G039757
Zm00001d022278	2	11.0902	GRMZM2G129761
Zm00001d022420	2	13.4236	GRMZM2G348125
Zm00001d022421	2	20.846	GRMZM2G469380
Zm00001d022467	2	8.69958	GRMZM2G174192
Zm00001d022513	2	16.6029	GRMZM2G439201
Zm00001d022516	2	16.1223	GRMZM2G410766
Zm00001d023343	2	25.956	GRMZM2G101958
Zm00001d023734	2	8.35583	GRMZM2G009448
Zm00001d023811	2	12.6628	GRMZM2G075283
Zm00001d024210	2	41.6775	GRMZM2G127087
Zm00001d024211	2	9.96443	GRMZM2G028306
Zm00001d024302	2	-19.04	GRMZM2G368861
Zm00001d024414	2	15.8024	GRMZM2G448627
Zm00001d024711	2	9.42795	GRMZM2G439268
Zm00001d024839	2	7.69183	GRMZM2G132093
Zm00001d024886	2	9.11189	GRMZM2G110567
Zm00001d024960	2	8.61774	GRMZM2G116520
Zm00001d024996	2	33.1921	GRMZM2G075315
Zm00001d025753	2	77.9411	GRMZM2G005633
Zm00001d026577	2	-12.3101	GRMZM2G340065
Zm00001d027258	2	13.5654	GRMZM2G333069
Zm00001d027740	2	12.3745	GRMZM2G472236
Zm00001d027832	2	13.739	GRMZM2G063287
Zm00001d028647	2	9.03996	GRMZM2G172574
Zm00001d028709	2	20.3155	GRMZM2G137839
Zm00001d028814	2	46.9038	GRMZM2G112538
Zm00001d028815	2	35.1635	GRMZM2G112524
Zm00001d028816	2	22.0501	GRMZM2G112488
Zm00001d028998	2	8.66796	GRMZM2G020940
Zm00001d029778	2	25.4111	GRMZM2G402564
Zm00001d030373	2	8.72479	GRMZM2G048371
Zm00001d031128	2	23.9559	GRMZM2G149751
Zm00001d031158	2	64.138	GRMZM2G402631
Zm00001d031168	2	14.1319	GRMZM2G080603
Zm00001d031727	2	12.7889	GRMZM2G175423
Zm00001d032825	2	11.1067	GRMZM2G067315
Zm00001d033158	2	-6.73395	GRMZM2G417089
Zm00001d033455	2	7.8286	GRMZM2G039639
Zm00001d033483	2	11.816	GRMZM2G169372
Zm00001d033623	2	29.693	GRMZM2G109130
Zm00001d033747	2	15.8378	GRMZM2G024104
Zm00001d033931	2	28.7411	GRMZM2G442658
Zm00001d034002	2	-14.9344	GRMZM2G025857
Zm00001d034095	2	7.067	GRMZM2G118809
Zm00001d034096	2	11.1181	GRMZM2G154870
Zm00001d034413	2	27.8284	GRMZM2G026703
Zm00001d035156	2	23.4399	GRMZM2G180625
Zm00001d035367	2	14.8623	GRMZM2G134020
Zm00001d035662	2	22.1504	GRMZM2G130173
Zm00001d036234	2	-6.70614	GRMZM5G829897
Zm00001d036370	2	7.07236	GRMZM2G145461
Zm00001d037656	2	37.1587	GRMZM2G447795
Zm00001d037894	2	68.1922	GRMZM2G079440
Zm00001d037988	2	-21.0903	AC233879.1_FG002
Zm00001d038163	2	-7.17782	GRMZM2G306345
Zm00001d038594	2	8.78795	GRMZM2G073535
Zm00001d038841	2	8.16397	GRMZM2G090245
Zm00001d038841	2	8.16397	GRMZM2G090087
Zm00001d038990	2	8.73887	GRMZM2G377613
Zm00001d038999	2	-6.96924	GRMZM2G038284
Zm00001d039131	2	12.9748	GRMZM2G027955
Zm00001d039859	2	13.8422	GRMZM2G099340
Zm00001d039914	2	113.9	GRMZM2G161154
Zm00001d039933	2	-7.99161	GRMZM2G437100
Zm00001d040026	2	10.6207	GRMZM2G114552
Zm00001d040697	2	19.4411	AC199526.5_FG002
Zm00001d041662	2	7.49508	AC206425.3_FG002
Zm00001d042022	2	8.16372	GRMZM2G103342
Zm00001d042025	2	7.04853	GRMZM2G171430
Zm00001d042114	2	14.0347	GRMZM2G037452
Zm00001d042140	2	25.8624	GRMZM2G125032
Zm00001d042446	2	-33.9293	AC209810.3_FG002
Zm00001d042541	2	7.72798	GRMZM2G156861
Zm00001d043121	2	54.4477	GRMZM2G092474
Zm00001d043382	2	-15.6611	GRMZM2G094712
Zm00001d043709	2	10.6839	GRMZM2G425629
Zm00001d044228	2	7.09924	GRMZM2G074097
Zm00001d045042	2	9.16253	GRMZM2G089713
Zm00001d045152	2	11.1238	GRMZM2G067707
Zm00001d045431	2	50.3787	GRMZM2G064302
Zm00001d046767	2	-9.06698	GRMZM5G836222
Zm00001d048021	2	15.4112	GRMZM2G067225
Zm00001d048176	2	30.148	GRMZM2G078441
Zm00001d048424	2	-11.3145	GRMZM2G330019
Zm00001d048634	2	17.7644	GRMZM6G617209
Zm00001d048702	2	8.49572	GRMZM2G167549
Zm00001d048903	2	10.1597	GRMZM2G133781
Zm00001d048947	2	10.9989	GRMZM2G117989
Zm00001d048948	2	38.2681	GRMZM2G419675
Zm00001d048948	2	38.2681	GRMZM2G454556
Zm00001d048949	2	38.5692	GRMZM2G117971
Zm00001d048950	2	11.2779	GRMZM2G117942
Zm00001d049239	2	23.2851	GRMZM2G015295
Zm00001d049409	2	-7.62394	GRMZM2G020801
Zm00001d049641	2	11.6274	GRMZM2G046804
Zm00001d051459	2	7.68246	GRMZM2G044627
Zm00001d052673	2	7.71246	GRMZM2G422750
Zm00001d052958	2	7.06793	GRMZM2G325118

## Sheet: Cellular component
Supplemental table 2. List of candidate genes with 2 standard deviations from the RDA axis 1 and 2 and the cellular component GO results.
Job ID: 397783310
GO Accession: GO:0012511
Ontology: Cellular Component
Description: monolayer-surrounded lipid storage body
Annotated/Total number in query list: 5/160
Annotated/Total number in background/reference: 7/25288
Name	GO terms	GO source	Description (Direct description or transfer from target)
AC206941.2_FG002	GO:0016021 integral to membrane	IPR000136	Oleosin
	GO:0012511 monolayer-surrounded lipid storage body
	GO:0016021 integral to membrane	IPR000136	Oleosin
	GO:0012511 monolayer-surrounded lipid storage body
GRMZM2G333069	GO:0016021 integral to membrane	IPR000136	Oleosin
	GO:0012511 monolayer-surrounded lipid storage body
GRMZM2G480954	GO:0016021 integral to membrane	IPR000136	Oleosin
	GO:0012511 monolayer-surrounded lipid storage body
GRMZM2G410152	GO:0016021 integral to membrane	IPR000136	Oleosin
	GO:0012511 monolayer-surrounded lipid storage body
