# Supplementary material for: Flavonoids Modulate the Accumulation of Toxins From Aspergillus flavus in Maize Kernels
Source: Front Plant Sci. 2021 Nov 26;12:761446. doi: 10.3389/fpls.2021.761446 (PMC8662736; doi:10.3389/fpls.2021.761446)
Supplement: Supplementary file 2 [file Table_4.xlsx]

## Sheet: CornCyc
Supplemental table 4. Enrichment results of differentially expressed genes showing adjusted p-values.
category	infected_vs_uninfected	corn_strain_M_vs_T	7d_vs_3d	3d_vs_8h
chitin degradation II (Vibrio)	0.0219422		9.10961e-05
eriodictyol C-glucosylation	0.00869685		0.0464124
naringenin C-glucosylation	0.00869685		0.0464124
pinocembrin C-glucosylation	0.00869685		0.0464124
formate oxidation to CO2	0.00869685
zealexin biosynthesis	0.0170866		0.0488576
phenylpropanoid biosynthesis, initial reactions	0.0219422
phloridzin biosynthesis	0.0297813
phenylpropanoid biosynthesis			0.0464124
apigeninidin 5-O-glucoside biosynthesis	0.0696196
luteolinidin 5-O-glucoside biosynthesis	0.0696196
L-asparagine biosynthesis I		0.0749346
L-asparagine biosynthesis II		0.0749346
superpathway of L-asparagine biosynthesis		0.0749346
DIMBOA-glucoside biosynthesis				0.0785969
hydroxycinnamic acid tyramine amides biosynthesis	0.0816743

## Sheet: Reactome
Supplemental table 4. Enrichment results of differentially expressed genes showing adjusted p-values.
description	category	infected_vs_uninfected	7d_vs_3d	corn_strain_T_vs_V
Ethylene biosynthesis from methionine	R-ZMA-1119334.1		0.00903627
Abscisic acid biosynthesis	R-ZMA-1119374.1			0.0760483
Phenylpropanoid biosynthesis, initial reactions	R-ZMA-1119582.1	0.0110376
Jasmonic acid signaling	R-ZMA-6787011.1	0.0110376
Salicylate biosynthesis	R-ZMA-1119261.1	0.0231537
Suberin biosynthesis	R-ZMA-1119418.1	0.0286815
Hydroxycinnamic acid serotonin amides biosynthesis	R-ZMA-1119344.1	0.0288579
Secologanin and strictosidine biosynthesis	R-ZMA-1119438.1	0.0656518

## Sheet: GO upregulated
Supplemental table 4. Enrichment results of differentially expressed genes showing adjusted p-values.
category	term	ontology	infected_vs_uninfected	7d_vs_3d	corn_strain_M_vs_T	corn_strain_M_vs_V	corn_strain_T_vs_V	3d_vs_8h
GO:0010200	response to chitin	BP	1.13406e-46	4.28215e-26	0.0155874	1.02419e-07	0.0180235	1.16322e-07
GO:0009743	response to carbohydrate	BP	2.96754e-39	3.70693e-18	0.0374867	1.97556e-06	0.0475803	4.20887e-09
GO:0048046	apoplast	CC	1.71376e-09	4.41869e-36	0.00747537	0.00738594	0.0398954	4.63614e-22
GO:0051704	multi-organism process	BP	1.52741e-20	1.82454e-23	0.0444252	1.34209e-06	0.000530297	6.51187e-16
GO:0055114	oxidation-reduction process	BP	7.15562e-08	1.22638e-22	0.0155671	0.00116502	0.000530297	0.00017929
GO:0046658	anchored component of plasma membrane	CC	0.0366571	2.46149e-17	0.0421335	0.0159945	0.0423997	3.68535e-19
GO:0050832	defense response to fungus	BP	2.89272e-16	2.92346e-13	0.0115249	0.00130311	0.0444207	0.0229088
GO:0009055	electron transfer activity	MF	3.90184e-06	3.52584e-14	0.0133002	0.00263845	0.0325645	0.00066118
GO:0020037	heme binding	MF	3.22632e-13	2.76783e-12	0.0115249	0.00595504	0.023396	1.74313e-07
GO:0016021	integral component of membrane	CC	1.55268e-12	2.02042e-10	0.0133002	0.0131932	0.0459183	5.81522e-09
GO:0008061	chitin binding	MF	7.83943e-09	1.97352e-12	0.0470936	0.0205826	0.0310584	0.000121374
GO:0030247	polysaccharide binding	MF	1.19737e-08	7.16338e-05	0.0216094	0.00727818	0.0159358	0.0031501
GO:0010310	regulation of hydrogen peroxide metabolic process	BP	2.09579e-07	6.59781e-07	0.0391616	0.000646893	0.0423997	4.62793e-07
GO:0009581	detection of external stimulus	BP	3.2533e-06	0.00948146	0.0145765	0.0146432	0.032743	0.00252835
GO:0016045	detection of bacterium	BP	2.02012e-05	0.00981	0.027163	0.00916909	0.0154249	0.000950091
GO:0044237	cellular metabolic process	BP	0.0111149	0.000581255	0.0102981	0.00251221	6.85727e-05	0.0159194
GO:0005516	calmodulin binding	MF	0.0001189	0.00172542	0.0382358	0.0218102	0.0423997	0.0112716
GO:0009628	response to abiotic stimulus	BP	0.0123958	0.00372389	0.0470936	0.0232533	0.0418458	0.00870749
GO:0044238	primary metabolic process	BP	3.38555e-05	1.26354e-11	0.000116238	1.02419e-07	4.21664e-08
GO:0008689	3-demethylubiquinone-9 3-O-methyltransferase activity	MF			0.000124439	0.00728331
GO:0004751	ribose-5-phosphate isomerase activity	MF			0.00110071
GO:0030246	carbohydrate binding	MF	2.24986e-05	0.000247607	0.00110071	0.0159945
GO:0044281	small molecule metabolic process	BP	0.00932949	0.0029032	0.00110071	0.023868	0.0475803
GO:0009607	response to biotic stimulus	BP	9.36222e-05	2.09669e-06	0.00148325	0.0138553		0.0230296
GO:0035194	post-transcriptional gene silencing by RNA	BP			0.00278994	0.0456421
GO:0009052	pentose-phosphate shunt, non-oxidative branch	BP			0.00393248
GO:0005506	iron ion binding	MF	4.22238e-12	2.35708e-08	0.00393248	0.0207817		0.00487952
GO:0050896	response to stimulus	BP		0.048206	0.00394402	0.0143199	0.0444207	0.00495685
GO:0051259	protein complex oligomerization	BP			0.00430843	0.0205826
GO:0050253	retinyl-palmitate esterase activity	MF		2.11061e-05	0.00620513
GO:0008425	2-polyprenyl-6-methoxy-1,4-benzoquinone methyltransferase activity	MF			0.00624742	0.00985365
GO:0008515	sucrose transmembrane transporter activity	MF		0.0128945	0.00624742			0.00496446
GO:0006468	protein phosphorylation	BP	3.36554e-10		0.00624742	0.0207817
GO:0006950	response to stress	BP		0.00699371	0.00643632	0.00727818	0.00852217
GO:0016787	hydrolase activity	MF	0.0335621	0.00165642	0.00747537
GO:0004512	inositol-3-phosphate synthase activity	MF		0.0183516	0.00747537
GO:0080030	methyl indole-3-acetate esterase activity	MF	0.0478711	2.74362e-07	0.00747537	0.0312594
GO:0009987	cellular process	BP		0.0109824	0.00918788	0.004591		0.000577274
GO:0009856	pollination	BP		0.00452353	0.00918788	0.00727818		0.00327258
GO:0080032	methyl jasmonate esterase activity	MF		1.47328e-06	0.0102981	0.0253456
GO:1901606	alpha-amino acid catabolic process	BP			0.0110948
GO:0004395	hexaprenyldihydroxybenzoate methyltransferase activity	MF			0.0110948
GO:0007165	signal transduction	BP	2.06359e-05		0.0115249	0.0358325		0.0210656
GO:0010476	gibberellin mediated signaling pathway	BP			0.0121546
GO:0030863	cortical cytoskeleton	CC			0.012686	0.0207817
GO:1901642	nucleoside transmembrane transport	BP			0.0133002
GO:0003824	catalytic activity	MF			0.0133002
GO:0007018	microtubule-based movement	BP			0.0145765
GO:0006480	N-terminal protein amino acid methylation	BP			0.0145765	0.0107043
GO:0080031	methyl salicylate esterase activity	MF		2.84668e-07	0.0145765	0.0360313
GO:0006811	ion transport	BP		0.0366953	0.0145765
GO:0009083	branched-chain amino acid catabolic process	BP			0.0145765
GO:0005509	calcium ion binding	MF	0.0198601	0.00223841	0.0154618	3.29037e-06	0.0319042
GO:0034656	nucleobase-containing small molecule catabolic process	BP			0.0155671	0.0461353
GO:0050590	desacetoxyvindoline 4-hydroxylase activity	MF			0.0155874			0.0381636
GO:0071446	cellular response to salicylic acid stimulus	BP		0.0392275	0.0155874			0.0109658
GO:0042221	response to chemical	BP	0.00503973	0.00456398	0.0155874	0.0151173	0.0423997
GO:0030604	1-deoxy-D-xylulose-5-phosphate reductoisomerase activity	MF			0.0155874	0.0480084
GO:0006952	defense response	BP	7.82154e-08	1.58899e-05	0.0155874		0.023056	0.000196892
GO:0007275	multicellular organism development	BP	4.26679e-05	0.0284954	0.0155874	0.0085199	0.0423997
GO:0006021	inositol biosynthetic process	BP		0.0454878	0.0162848
GO:0070588	calcium ion transmembrane transport	BP			0.0162848
GO:0006629	lipid metabolic process	BP	0.0436665		0.0171569	0.00727818
GO:0003839	gamma-glutamylcyclotransferase activity	MF			0.0171569
GO:0016231	beta-N-acetylglucosaminidase activity	MF	0.0384462	0.00213774	0.0171569			0.0387458
GO:0043331	response to dsRNA	BP			0.0175031
GO:0005911	cell-cell junction	CC			0.0187878	0.0219582
GO:0009415	response to water	BP		0.0250245	0.0187878
GO:0043531	ADP binding	MF			0.0187878
GO:0016853	isomerase activity	MF		0.000375572	0.0189517
GO:0005669	transcription factor TFIID complex	CC			0.0189517
GO:0031408	oxylipin biosynthetic process	BP	0.000471543	1.26354e-11	0.0200173	0.0387399		0.00254034
GO:0010420	3,4-dihydroxy-5-polyprenylbenzoic acid O-methyltransferase activity	MF			0.0202276	0.0190741
GO:0015923	mannosidase activity	MF			0.0203686	0.0205826
GO:0070182	DNA polymerase binding	MF			0.0203686			0.0307061
GO:0031314	extrinsic component of mitochondrial inner membrane	CC			0.0203686	0.00728331
GO:0004556	alpha-amylase activity	MF			0.0203686
GO:0015770	sucrose transport	BP	0.0105553	0.0123633	0.0220732	0.0031229		0.00418495
GO:0004672	protein kinase activity	MF			0.0226003
GO:0090353	polygalacturonase inhibitor activity	MF	0.0192467	0.0177002	0.0226003			0.0396822
GO:0046406	magnesium protoporphyrin IX methyltransferase activity	MF			0.0229704
GO:0033609	oxalate metabolic process	BP	4.44312e-12	1.35179e-10	0.0255242
GO:0075733	intracellular transport of virus	BP			0.0255381	0.0207817
GO:0008442	3-hydroxyisobutyrate dehydrogenase activity	MF			0.0255381
GO:0030145	manganese ion binding	MF	1.9598e-07	2.33238e-06	0.026964	0.0360313		0.00613079
GO:0051336	regulation of hydrolase activity	BP			0.027163	0.0207817
GO:0034219	carbohydrate transmembrane transport	BP		0.0259664	0.027163	0.0392857		0.00268441
GO:0005887	integral component of plasma membrane	CC		1.25043e-06	0.0286038	0.0207817		0.000238614
GO:0002679	respiratory burst involved in defense response	BP	5.00027e-30	3.03211e-12	0.0288543	0.000646893		0.0176078
GO:0000165	MAPK cascade	BP	1.60061e-05	0.00481503	0.0290918	0.0225543		0.000402196
GO:0010155	regulation of proton transport	BP		6.34407e-05	0.0311765	0.0251681
GO:0030170	pyridoxal phosphate binding	MF	0.0352292	0.0412432	0.0311765
GO:0080170	hydrogen peroxide transmembrane transport	BP		0.000830659	0.0311765	0.0207817
GO:0015810	aspartate transmembrane transport	BP			0.0311765	0.0207817		0.0175979
GO:0015827	tryptophan transport	BP			0.0311765	0.0207817		0.0175979
GO:0032025	response to cobalt ion	BP			0.0311765
GO:0070204	2-succinyl-5-enolpyruvyl-6-hydroxy-3-cyclohexene-1-carboxylic-acid synthase activity	MF			0.0311765
GO:0003899	DNA-directed 5'-3' RNA polymerase activity	MF			0.0311765
GO:0046680	response to DDT	BP			0.0311765
GO:0009939	positive regulation of gibberellic acid mediated signaling pathway	BP			0.0314543
GO:0004616	phosphogluconate dehydrogenase (decarboxylating) activity	MF			0.0322592
GO:0050877	nervous system process	BP			0.0336607
GO:0004190	aspartic-type endopeptidase activity	MF	0.0014595	0.0276919	0.0336918			0.0378297
GO:0005983	starch catabolic process	BP			0.0354539
GO:0051707	response to other organism	BP		1.32799e-07	0.036218	0.0128841	5.63184e-06	2.32567e-06
GO:0042025	host cell nucleus	CC			0.0363105
GO:0046872	metal ion binding	MF			0.0363105
GO:0055085	transmembrane transport	BP			0.0363105	0.0207817	0.0378272
GO:0045735	nutrient reservoir activity	MF	1.7395e-06	1.84677e-06	0.0363105		5.02543e-06
GO:0071470	cellular response to osmotic stress	BP		0.0165573	0.0369216			0.0192348
GO:0030795	jasmonate O-methyltransferase activity	MF			0.0369216
GO:0016311	dephosphorylation	BP	0.0310136	0.0259664	0.0369216			0.0225222
GO:0005275	amine transmembrane transporter activity	MF		0.0183111	0.0369216	0.0302955		0.000443453
GO:0009595	detection of biotic stimulus	BP	0.00225057	5.49638e-05	0.0369216	0.00727818		0.00859117
GO:0050794	regulation of cellular process	BP			0.0369216
GO:0009056	catabolic process	BP			0.0369216
GO:0008843	endochitinase activity	MF		0.00199135	0.0369216			0.0128787
GO:0009871	jasmonic acid and ethylene-dependent systemic resistance, ethylene mediated signaling pathway	BP		0.00203279	0.0371528
GO:0005388	calcium transmembrane transporter activity, phosphorylative mechanism	MF			0.0374867
GO:0019320	hexose catabolic process	BP			0.0374867
GO:0009815	1-aminocyclopropane-1-carboxylate oxidase activity	MF	0.000360832	0.0454699	0.0374867			0.000791045
GO:0001649	osteoblast differentiation	BP			0.0374867
GO:0004514	nicotinate-nucleotide diphosphorylase (carboxylating) activity	MF			0.0374867
GO:0044260	cellular macromolecule metabolic process	BP		0.0364838	0.0374867	7.68663e-05	0.0190497
GO:1990380	Lys48-specific deubiquitinase activity	MF			0.0374867
GO:0022804	active transmembrane transporter activity	MF		0.0119379	0.0374867	0.034275		6.09391e-05
GO:0023052	signaling	BP			0.0374867		0.023396	0.0132847
GO:0032501	multicellular organismal process	BP			0.0374867	0.0297777
GO:0009626	plant-type hypersensitive response	BP	0.00191342		0.0374867
GO:0050736	O-malonyltransferase activity	MF			0.0374867
GO:0006573	valine metabolic process	BP			0.0377357
GO:0009682	induced systemic resistance	BP	0.044942	0.0482334	0.0382358			0.0254084
GO:0071461	cellular response to redox state	BP			0.0382358
GO:0010234	anther wall tapetum cell fate specification	BP			0.0382358			0.035761
GO:0016807	cysteine-type carboxypeptidase activity	MF			0.0382358
GO:0005047	signal recognition particle binding	MF			0.0382358
GO:1905348	endonuclease complex	CC			0.0382358	0.0320725
GO:1990391	DNA repair complex	CC			0.0382358	0.0320725
GO:0006751	glutathione catabolic process	BP			0.0382358
GO:0031057	negative regulation of histone modification	BP			0.0382358
GO:0050162	oxalate oxidase activity	MF	1.55268e-12	6.27734e-11	0.0382358
GO:0010363	regulation of plant-type hypersensitive response	BP	1.95305e-13	1.99296e-11	0.0382358	0.00263845		2.64855e-06
GO:0031668	cellular response to extracellular stimulus	BP			0.0382358	0.0315419
GO:0016043	cellular component organization	BP			0.0382358
GO:0045165	cell fate commitment	BP		0.041488	0.0385719
GO:0008652	cellular amino acid biosynthetic process	BP	0.000627747	0.00209633	0.0385719			0.0102016
GO:0019447	D-cysteine catabolic process	BP			0.0385719
GO:0009695	jasmonic acid biosynthetic process	BP	2.19629e-16	1.40276e-11	0.0385719	0.0363062		0.00138745
GO:0033263	CORVET complex	CC			0.0385719
GO:0002237	response to molecule of bacterial origin	BP	0.0195539		0.0387731			8.60252e-06
GO:0048812	neuron projection morphogenesis	BP			0.0391616	0.00985365
GO:0009505	plant-type cell wall	CC	0.00086727	1.69845e-19	0.0391616			2.32452e-31
GO:0004476	mannose-6-phosphate isomerase activity	MF		0.0438601	0.0391616
GO:0000272	polysaccharide catabolic process	BP	0.0134721	5.06415e-06	0.0391616			0.000221737
GO:0035250	UDP-galactosyltransferase activity	MF			0.0393565
GO:0019058	viral life cycle	BP			0.0405454
GO:0065008	regulation of biological quality	BP			0.041064
GO:0009531	secondary cell wall	CC		0.0209999	0.0411727
GO:0016747	transferase activity, transferring acyl groups other than amino-acyl groups	MF			0.042014	0.0320725		0.00370099
GO:0043657	host cell	CC			0.0421335
GO:0006352	DNA-templated transcription, initiation	BP			0.0421335
GO:0102344	3-hydroxy-behenoyl-CoA dehydratase activity	MF			0.0421335
GO:0102345	3-hydroxy-lignoceroyl-CoA dehydratase activity	MF			0.0421335
GO:0004674	protein serine/threonine kinase activity	MF	1.53515e-15		0.0421335	0.00012675	0.0494	0.0148454
GO:0045471	response to ethanol	BP			0.0421335
GO:0030942	endoplasmic reticulum signal peptide binding	MF			0.0421335	0.0360313
GO:0016730	oxidoreductase activity, acting on iron-sulfur proteins as donors	MF			0.0421335
GO:0008092	cytoskeletal protein binding	MF			0.0421335
GO:0009310	amine catabolic process	BP			0.0421335
GO:0003333	amino acid transmembrane transport	BP		0.0142712	0.0421335			0.000943286
GO:0004853	uroporphyrinogen decarboxylase activity	MF			0.0421335
GO:0080045	quercetin 3'-O-glucosyltransferase activity	MF	0.00801382		0.0421335
GO:0050801	ion homeostasis	BP			0.0421335
GO:0015976	carbon utilization	BP			0.0421335
GO:0031324	negative regulation of cellular metabolic process	BP			0.0421335
GO:0004066	asparagine synthase (glutamine-hydrolyzing) activity	MF			0.0421335
GO:0000280	nuclear division	BP			0.0421335
GO:0016308	1-phosphatidylinositol-4-phosphate 5-kinase activity	MF			0.0421335
GO:0010438	cellular response to sulfur starvation	BP			0.0421335
GO:0018548	pentaerythritol trinitrate reductase activity	MF			0.0421335	0.0360313
GO:0052690	trichloro-p-hydroquinone reductive dehalogenase activity	MF			0.0421335	0.0360313
GO:0005274	allantoin:proton symporter activity	MF			0.0421335	0.00727818
GO:0015505	uracil:cation symporter activity	MF			0.0421335	0.00727818
GO:0015720	allantoin transport	BP			0.0421335	0.00727818
GO:0015857	uracil transport	BP			0.0421335	0.00727818
GO:0042906	xanthine transport	BP			0.0421335	0.00727818
GO:0042907	xanthine transmembrane transporter activity	MF			0.0421335	0.00727818
GO:0072531	pyrimidine-containing compound transmembrane transport	BP			0.0421335	0.00727818
GO:0033850	Z-farnesyl diphosphate synthase activity	MF		0.00507071	0.0421335	0.0360313
GO:0005880	nuclear microtubule	CC			0.0421335
GO:0016767	geranylgeranyl-diphosphate geranylgeranyltransferase activity	MF		0.0051268	0.0421335
GO:0007178	transmembrane receptor protein serine/threonine kinase signaling pathway	BP	0.00736514	0.0165531	0.0421335			0.00183857
GO:0051674	localization of cell	BP			0.0421335
GO:0015204	urea transmembrane transporter activity	MF		0.00922006	0.0421335	0.0360313
GO:0044423	virion part	CC			0.0421335
GO:0016149	translation release factor activity, codon specific	MF			0.0421335
GO:0019199	transmembrane receptor protein kinase activity	MF	0.00736514	0.0267459	0.0421335
GO:2000652	regulation of secondary cell wall biogenesis	BP		0.0322294	0.0421335
GO:0061647	histone H3-K9 modification	BP			0.0421335
GO:0010342	endosperm cellularization	BP			0.0421335
GO:0016763	transferase activity, transferring pentosyl groups	MF			0.0421335
GO:0034387	4-aminobutyrate:pyruvate transaminase activity	MF			0.0421335
GO:0032461	positive regulation of protein oligomerization	BP			0.0421335
GO:0010325	raffinose family oligosaccharide biosynthetic process	BP			0.0421335
GO:0042887	amide transmembrane transporter activity	MF			0.0421335
GO:0015824	proline transport	BP	0.000131777	2.09669e-06	0.0428789			0.0116753
GO:0050224	prunasin beta-glucosidase activity	MF		0.0219233	0.0430416
GO:0006614	SRP-dependent cotranslational protein targeting to membrane	BP			0.043579
GO:0006612	protein targeting to membrane	BP	2.81332e-13	3.32901e-10	0.0436535	0.00263845		8.58301e-06
GO:0008152	metabolic process	BP		0.0139029	0.0436535	0.0358325
GO:0042597	periplasmic space	CC			0.0438102	0.0425353
GO:0019464	glycine decarboxylation via glycine cleavage system	BP			0.0438102
GO:0002764	immune response-regulating signaling pathway	BP	0.0478711		0.0439705	0.0207817	0.0296467
GO:0071215	cellular response to abscisic acid stimulus	BP		0.0492447	0.0439705
GO:0006869	lipid transport	BP		6.44373e-07	0.0444252		0.0154918	0.00175829
GO:0051592	response to calcium ion	BP			0.0444252
GO:0008278	cohesin complex	CC			0.0444252
GO:0009835	fruit ripening	BP	2.23653e-07	0.00822068	0.0444252	0.0363904		0.00195331
GO:0009653	anatomical structure morphogenesis	BP			0.0452561
GO:0031298	replication fork protection complex	CC			0.0452561
GO:0033384	geranyl diphosphate biosynthetic process	BP		0.0174939	0.0460088			0.0176702
GO:0008272	sulfate transport	BP			0.0460088
GO:0033591	response to L-ascorbic acid	BP		0.0176568	0.0460607	0.0419655		0.0178112
GO:0016165	linoleate 13S-lipoxygenase activity	MF	0.000118142	0.000694527	0.0460658	0.0207817		0.0367244
GO:0010033	response to organic substance	BP	0.010897	0.000409961	0.0470936
GO:0003774	motor activity	MF			0.0470936
GO:0050664	oxidoreductase activity, acting on NAD(P)H, oxygen as acceptor	MF			0.0470936		0.0494
GO:0009269	response to desiccation	BP		6.59712e-06	0.0470936			0.011476
GO:0016788	hydrolase activity, acting on ester bonds	MF			0.0470936	0.0205826
GO:0016629	12-oxophytodienoate reductase activity	MF	0.00517761	0.00351681	0.0477129	0.018282
GO:0016620	oxidoreductase activity, acting on the aldehyde or oxo group of donors, NAD or NADP as acceptor	MF			0.0477129
GO:0030097	hemopoiesis	BP			0.0477129
GO:0044550	secondary metabolite biosynthetic process	BP		0.0255582	0.047778	0.0360313
GO:0015098	molybdate ion transmembrane transporter activity	MF			0.0491108
GO:0070887	cellular response to chemical stimulus	BP		3.54781e-08	0.0491108
GO:0003777	microtubule motor activity	MF			0.0493741
GO:0009867	jasmonic acid mediated signaling pathway	BP	9.22302e-16	9.4519e-07	0.0498916	0.0268482		0.00123849
GO:0009045	xylose isomerase activity	MF			0.0498916
GO:0009651	response to salt stress	BP	4.07963e-09	2.29616e-27				6.99724e-11
GO:0005576	extracellular region	CC	9.93452e-07	2.2184e-26		0.0207817	0.0119814	3.30846e-24
GO:0009611	response to wounding	BP	8.88915e-40	2.17289e-25		0.00734595	0.0423997	2.80086e-05
GO:0009409	response to cold	BP	5.04026e-06	1.69845e-19		0.000224916	0.000530297	7.03739e-06
GO:0044283	small molecule biosynthetic process	BP	0.010897	1.7759e-19			0.0170935	5.75612e-09
GO:0009699	phenylpropanoid biosynthetic process	BP	3.13593e-07	6.34444e-18			0.0116111	7.82703e-12
GO:0010167	response to nitrate	BP	5.25403e-11	2.86284e-16		0.032466	0.0269819	6.56412e-10
GO:0015706	nitrate transport	BP	1.81794e-10	5.10011e-15		0.0287973	0.0154249	7.59049e-10
GO:0009414	response to water deprivation	BP	4.13558e-11	9.94327e-15		0.0207817	0.0398954	1.80086e-05
GO:0030003	cellular cation homeostasis	BP		9.94327e-15		0.00147371	0.0423997	0.00092
GO:0080167	response to karrikin	BP	5.69795e-16	1.69619e-14		0.00312448	0.000259086	1.2894e-14
GO:0009809	lignin biosynthetic process	BP	0.0127138	5.34653e-14				4.76696e-05
GO:0009963	positive regulation of flavonoid biosynthetic process	BP	0.000294738	8.16771e-14				7.25257e-08
GO:0006833	water transport	BP		1.26992e-13				1.00008e-07
GO:0009753	response to jasmonic acid	BP	3.18142e-12	2.92346e-13			0.0398954	3.76641e-06
GO:0006598	polyamine catabolic process	BP	1.25765e-06	2.03721e-12		0.0268482		1.23099e-06
GO:0009737	response to abscisic acid	BP	0.00579256	2.0675e-12		0.0153674		1.57061e-07
GO:0009744	response to sucrose	BP	0.0154665	3.02439e-12		0.0294927	0.0398954	6.3442e-07
GO:0006979	response to oxidative stress	BP	3.84418e-12	4.31035e-12		3.34257e-06	0.0154249	0.00104566
GO:2000762	regulation of phenylpropanoid metabolic process	BP	0.00025008	7.69367e-12				3.26158e-09
GO:0009535	chloroplast thylakoid membrane	CC		1.26354e-11		0.0130857	0.00449334
GO:0009751	response to salicylic acid	BP	3.59326e-05	1.70027e-11			0.0399186	0.00188202
GO:0070838	divalent metal ion transport	BP		1.93947e-11		0.00283024	0.0154249	0.000121374
GO:0009733	response to auxin	BP	1.09023e-09	2.08639e-11			0.0116111	0.000342445
GO:0046914	transition metal ion binding	MF	0.0402521	1.27175e-10			0.0490099	0.000607512
GO:1900378	positive regulation of secondary metabolite biosynthetic process	BP	0.000602508	1.27295e-10				8.60252e-06
GO:0019344	cysteine biosynthetic process	BP		1.3001e-10				0.00432923
GO:0019748	secondary metabolic process	BP	0.00673064	1.31253e-10				9.16167e-06
GO:0031012	extracellular matrix	CC	1.75679e-12	1.8358e-10
GO:0009718	anthocyanin-containing compound biosynthetic process	BP	2.8561e-05	1.89931e-10				1.16875e-07
GO:0009768	photosynthesis, light harvesting in photosystem I	BP		4.32841e-10
GO:0042742	defense response to bacterium	BP	5.04026e-06	5.25969e-10		0.00738594	0.0261665	9.31657e-07
GO:0006575	cellular modified amino acid metabolic process	BP	0.000245334	6.50531e-10			0.0423997	0.00245031
GO:0009750	response to fructose	BP		1.53331e-09				1.50765e-05
GO:0016206	catechol O-methyltransferase activity	MF	0.00175617	1.7388e-09				8.51082e-05
GO:0009805	coumarin biosynthetic process	BP	0.00116894	2.5436e-09			0.0154249	4.8352e-05
GO:0031409	pigment binding	MF		2.58252e-09
GO:0005886	plasma membrane	CC	3.01854e-12	2.71653e-09				2.68923e-17
GO:0046686	response to cadmium ion	BP		3.61037e-09				2.11842e-08
GO:0010114	response to red light	BP		4.28005e-09		0.0402462	0.0423997
GO:0010106	cellular response to iron ion starvation	BP	0.000420196	9.56345e-09				0.000247174
GO:0008289	lipid binding	MF		1.0722e-08		0.0254577	0.0119814	0.000379141
GO:0009693	ethylene biosynthetic process	BP	6.30984e-20	1.0918e-08		0.0143199		0.00419224
GO:0009637	response to blue light	BP		1.4764e-08		0.0363904		0.0263529
GO:0042349	guiding stereospecific synthesis activity	MF	0.044942	2.41811e-08			0.0490099	0.00015833
GO:0010287	plastoglobule	CC		2.52886e-08		0.0218101	0.0190497
GO:0010218	response to far red light	BP		3.27681e-08				0.0338197
GO:0046916	cellular transition metal ion homeostasis	BP	0.0255082	4.11437e-08				0.000189546
GO:0042744	hydrogen peroxide catabolic process	BP	0.000776109	5.37532e-08		0.0409929		3.07221e-06
GO:0010413	glucuronoxylan metabolic process	BP	0.0142062	6.18909e-08				6.95343e-05
GO:0016168	chlorophyll binding	MF	0.0031111	9.26049e-08			0.0190497
GO:0010583	response to cyclopentenone	BP	5.11796e-08	1.18966e-07		0.00898187	0.0367239	3.39918e-08
GO:0032787	monocarboxylic acid metabolic process	BP	0.000107966	1.19095e-07			0.0359039	1.32834e-06
GO:0045492	xylan biosynthetic process	BP	0.0194196	1.19657e-07				8.47863e-05
GO:0010224	response to UV-B	BP	2.48204e-06	1.22064e-07			0.0147423	5.93156e-07
GO:0009506	plasmodesma	CC		1.32799e-07				2.45342e-11
GO:0019216	regulation of lipid metabolic process	BP		1.39693e-07				0.0023935
GO:0009522	photosystem I	CC		1.55016e-07
GO:0009862	systemic acquired resistance, salicylic acid mediated signaling pathway	BP	1.13475e-08	1.55016e-07		0.00898187	0.0481327	1.73166e-06
GO:0016998	cell wall macromolecule catabolic process	BP	0.00216103	1.72459e-07				0.0188384
GO:0006826	iron ion transport	BP	0.0228326	1.77365e-07			0.0423997	0.00053588
GO:0042398	cellular modified amino acid biosynthetic process	BP	0.0003092	1.97512e-07		0.0205826
GO:0005507	copper ion binding	MF		2.23371e-07				7.22696e-11
GO:0048767	root hair elongation	BP		2.94461e-07		0.0307187		8.40487e-18
GO:0016762	xyloglucan:xyloglucosyl transferase activity	MF		3.26268e-07		0.00922504		0.000560119
GO:0048646	anatomical structure formation involved in morphogenesis	BP		4.03906e-07				2.17299e-21
GO:0031328	positive regulation of cellular biosynthetic process	BP	0.0223243	5.26327e-07				0.000948268
GO:0009620	response to fungus	BP	1.43573e-21	6.0101e-07		0.0146432		0.00186924
GO:0046165	alcohol biosynthetic process	BP		6.92531e-07				4.20233e-10
GO:0009543	chloroplast thylakoid lumen	CC		7.31858e-07
GO:0034641	cellular nitrogen compound metabolic process	BP		8.28453e-07		0.0363904		0.0378297
GO:0044255	cellular lipid metabolic process	BP	0.00025008	1.09106e-06				0.00042691
GO:0006032	chitin catabolic process	BP	0.000107093	1.43971e-06			0.0375946	0.0113749
GO:0009612	response to mechanical stimulus	BP	1.69136e-09	1.90662e-06		0.00263845		0.000748524
GO:0009773	photosynthetic electron transport in photosystem I	BP		2.06441e-06
GO:0031348	negative regulation of defense response	BP	3.28523e-09	2.11049e-06		0.0207817		0.0040535
GO:0031225	anchored component of membrane	CC	0.00127045	2.24032e-06				0.000724227
GO:0004867	serine-type endopeptidase inhibitor activity	MF		2.27896e-06			0.015857
GO:0097305	response to alcohol	BP		2.33238e-06			0.0423997	5.75612e-09
GO:0042538	hyperosmotic salinity response	BP	1.65217e-09	2.33238e-06		0.0125094		0.000174863
GO:0010951	negative regulation of endopeptidase activity	BP		2.33238e-06			0.0321006
GO:0016798	hydrolase activity, acting on glycosyl bonds	MF		2.5623e-06		0.0207817	0.023056	0.0470725
GO:0009739	response to gibberellin	BP	0.0488502	2.61797e-06		0.00727818	0.0391816	0.0230168
GO:0043231	intracellular membrane-bounded organelle	CC	2.35003e-07	2.64514e-06		0.0207817	0.0170935
GO:0006816	calcium ion transport	BP		3.05008e-06				2.64855e-06
GO:0003955	NAD(P)H dehydrogenase (quinone) activity	MF		3.26359e-06		0.0151503
GO:0042180	cellular ketone metabolic process	BP	0.00692294	5.15184e-06				6.63802e-06
GO:0009738	abscisic acid-activated signaling pathway	BP	1.71628e-17	5.2936e-06				0.0103883
GO:0009725	response to hormone	BP		5.87879e-06			0.0119814	0.00141132
GO:0004497	monooxygenase activity	MF	4.18632e-06	7.24374e-06			0.0459183
GO:0070301	cellular response to hydrogen peroxide	BP	0.00980232	7.64152e-06			0.0423997	0.00133295
GO:0000038	very long-chain fatty acid metabolic process	BP	0.0140448	7.64152e-06			0.0432916	8.87333e-07
GO:0010411	xyloglucan metabolic process	BP		8.81437e-06		0.0266963		5.29516e-05
GO:0018298	protein-chromophore linkage	BP	0.0134721	1.12941e-05
GO:0006970	response to osmotic stress	BP		1.33268e-05
GO:0046244	salicylic acid catabolic process	BP	1.21577e-08	1.33268e-05				0.00363012
GO:0048653	anther development	BP	0.044942	1.3415e-05		0.0125094		1.9392e-12
GO:0009913	epidermal cell differentiation	BP		1.38522e-05				3.12969e-16
GO:0052889	9,9'-di-cis-zeta-carotene desaturation to 7,9,7',9'-tetra-cis-lycopene	BP		1.41592e-05				0.00479283
GO:0009523	photosystem II	CC		1.43786e-05			0.0423997
GO:0009416	response to light stimulus	BP	0.000118142	1.51554e-05			0.0364236	1.74313e-07
GO:0005773	vacuole	CC	3.30672e-06	1.58899e-05		0.0159945		1.81438e-05
GO:0010117	photoprotection	BP	1.08721e-05	1.82589e-05		0.00570108		0.00598437
GO:0004568	chitinase activity	MF	4.70583e-05	1.82589e-05		0.0397363	0.00449334	0.0178112
GO:0042546	cell wall biogenesis	BP		1.97035e-05				1.43415e-06
GO:0015995	chlorophyll biosynthetic process	BP		2.17955e-05
GO:0019761	glucosinolate biosynthetic process	BP		2.46607e-05				0.0121036
GO:0015250	water channel activity	MF		2.61992e-05				0.0159194
GO:0006636	unsaturated fatty acid biosynthetic process	BP		2.68448e-05				0.0244854
GO:0042335	cuticle development	BP		2.85535e-05				3.53756e-08
GO:0009941	chloroplast envelope	CC		3.40545e-05
GO:0009817	defense response to fungus, incompatible interaction	BP	3.18037e-05	3.43024e-05
GO:0042807	central vacuole	CC		3.43024e-05		0.0312594
GO:0030001	metal ion transport	BP	0.014198	3.43024e-05				0.000103421
GO:0045892	negative regulation of transcription, DNA-templated	BP	0.0191407	3.4968e-05
GO:0006520	cellular amino acid metabolic process	BP	0.0434021	3.86762e-05
GO:0018130	heterocycle biosynthetic process	BP	1.822e-05	4.07469e-05			0.0423997	0.0124836
GO:0016036	cellular response to phosphate starvation	BP	0.0434021	4.27162e-05
GO:0010207	photosystem II assembly	BP		4.51856e-05			0.0375946
GO:0007389	pattern specification process	BP		4.84195e-05				1.3633e-14
GO:0050662	coenzyme binding	MF		4.9763e-05		0.0205826
GO:0016042	lipid catabolic process	BP		5.25869e-05			0.0416041	0.000179172
GO:0015757	galactose transmembrane transport	BP		5.48378e-05
GO:0016138	glycoside biosynthetic process	BP		6.17602e-05				0.0163369
GO:0043900	regulation of multi-organism process	BP	8.16415e-07	6.18711e-05		0.00193677	0.0444207	0.000607512
GO:0016117	carotenoid biosynthetic process	BP		7.13157e-05
GO:0006098	pentose-phosphate shunt	BP		7.16338e-05			0.0482883
GO:0006334	nucleosome assembly	BP		7.55066e-05				2.29179e-07
GO:0016621	cinnamoyl-CoA reductase activity	MF		7.73713e-05				0.0493214
GO:0006007	glucose catabolic process	BP		7.81122e-05				0.000213204
GO:0006740	NADPH regeneration	BP		7.81122e-05
GO:0007030	Golgi organization	BP		7.88599e-05				3.03824e-05
GO:0019375	galactolipid biosynthetic process	BP		7.95509e-05			0.0423997
GO:0016126	sterol biosynthetic process	BP		8.067e-05				1.87666e-07
GO:0000271	polysaccharide biosynthetic process	BP		8.17244e-05				2.77659e-13
GO:0005354	galactose transmembrane transporter activity	MF		8.58041e-05				0.0333582
GO:0050625	2-hydroxy-1,4-benzoquinone reductase activity	MF		8.82633e-05		0.0207817
GO:0009834	plant-type secondary cell wall biogenesis	BP		9.38546e-05				3.06986e-05
GO:0071555	cell wall organization	BP		9.85173e-05				2.84778e-19
GO:0004553	hydrolase activity, hydrolyzing O-glycosyl compounds	MF	0.0474037	0.000104078		9.62263e-05	0.0105681	0.00319154
GO:0005365	myo-inositol transmembrane transporter activity	MF		0.000104395
GO:0015148	D-xylose transmembrane transporter activity	MF		0.000104395
GO:0015575	mannitol transmembrane transporter activity	MF		0.000104395
GO:0015576	sorbitol transmembrane transporter activity	MF		0.000104395
GO:0015591	D-ribose transmembrane transporter activity	MF		0.000104395
GO:0015752	D-ribose transmembrane transport	BP		0.000104395
GO:0015753	D-xylose transmembrane transport	BP		0.000104395
GO:0015795	sorbitol transport	BP		0.000104395
GO:0015797	mannitol transport	BP		0.000104395
GO:0006546	glycine catabolic process	BP		0.000107306				0.0012597
GO:0015168	glycerol transmembrane transporter activity	MF		0.000113299
GO:0098869	cellular oxidant detoxification	BP	0.000168969	0.000114783		0.0167124	0.0170935	0.00285007
GO:0009741	response to brassinosteroid	BP	0.0450845	0.000120041				7.22696e-11
GO:0009657	plastid organization	BP		0.000120041			0.0499075	0.0220605
GO:0005982	starch metabolic process	BP		0.000124669				0.0155458
GO:0009631	cold acclimation	BP		0.000144461
GO:0005615	extracellular space	CC	0.0233403	0.000153491				0.000564025
GO:0009106	lipoate metabolic process	BP		0.000162221				0.00111012
GO:0006066	alcohol metabolic process	BP	0.0192467	0.000168678				0.0212148
GO:0060416	response to growth hormone	BP	0.000118142	0.000171248				0.0469537
GO:0008283	cell population proliferation	BP		0.000171248				0.0404901
GO:0015793	glycerol transport	BP		0.000177048
GO:0015800	acidic amino acid transport	BP		0.00017824			0.0494
GO:0009697	salicylic acid biosynthetic process	BP	3.62554e-07	0.00018971		0.00738594	0.0496583	0.0266523
GO:0009664	plant-type cell wall organization	BP		0.00018971				2.44463e-16
GO:0010075	regulation of meristem growth	BP		0.000195877				1.57484e-26
GO:0080044	quercetin 7-O-glucosyltransferase activity	MF	4.07906e-05	0.000211663		0.00272105	0.00478156
GO:0016572	histone phosphorylation	BP		0.000211812
GO:0009072	aromatic amino acid family metabolic process	BP		0.000224188				0.00098145
GO:0005618	cell wall	CC	0.0311176	0.000228625				0.00210787
GO:0010389	regulation of G2/M transition of mitotic cell cycle	BP		0.000243216
GO:0019288	isopentenyl diphosphate biosynthetic process, methylerythritol 4-phosphate pathway	BP		0.000248693
GO:0009820	alkaloid metabolic process	BP	0.00369468	0.000250837		0.00898187	0.0423997
GO:0045926	negative regulation of growth	BP	0.00136946	0.000251551				0.0284069
GO:0047172	shikimate O-hydroxycinnamoyltransferase activity	MF		0.00030417				0.0257143
GO:0047205	quinate O-hydroxycinnamoyltransferase activity	MF		0.000310278				0.011476
GO:0071281	cellular response to iron ion	BP		0.00031183
GO:0008233	peptidase activity	MF		0.000321109				0.00156275
GO:0005783	endoplasmic reticulum	CC	0.000959304	0.000328748		0.0358325		0.0250289
GO:0035264	multicellular organism growth	BP	2.21386e-05	0.000389055		0.00738594		0.0338827
GO:0004601	peroxidase activity	MF	0.00140514	0.000390089		0.0158826	0.0332485	0.000967452
GO:0016132	brassinosteroid biosynthetic process	BP		0.000391287				3.76989e-10
GO:0080043	quercetin 3-O-glucosyltransferase activity	MF	0.00012568	0.000408648		0.00263845	0.00449334
GO:0045792	negative regulation of cell size	BP	0.0255082	0.000449176
GO:0002831	regulation of response to biotic stimulus	BP	0.0137698	0.000509122		0.00774129		0.00108388
GO:0009816	defense response to bacterium, incompatible interaction	BP	1.2447e-08	0.0005108
GO:0010054	trichoblast differentiation	BP		0.000533328				0.0037282
GO:2000026	regulation of multicellular organismal development	BP		0.000540932				3.99786e-21
GO:0000079	regulation of cyclin-dependent protein serine/threonine kinase activity	BP		0.000549916				0.0191036
GO:0031640	killing of cells of other organism	BP	0.00191345	0.000582275			0.0364236
GO:0009926	auxin polar transport	BP		0.000611805				1.50099e-12
GO:0000786	nucleosome	CC		0.000611805				1.23954e-05
GO:0047044	androstan-3-alpha,17-beta-diol dehydrogenase activity	MF		0.000618988				0.023326
GO:0000911	cytokinesis by cell plate formation	BP		0.000622773
GO:0009819	drought recovery	BP	4.07906e-05	0.000625626				0.0344233
GO:0009826	unidimensional cell growth	BP	0.0464922	0.000627364				0.00845221
GO:0005355	glucose transmembrane transporter activity	MF		0.000637593				0.0372477
GO:0048226	Casparian strip	CC		0.000651719
GO:0035304	regulation of protein dephosphorylation	BP		0.000663893
GO:0051504	diterpene phytoalexin precursor biosynthetic process pathway	BP		0.000693723				0.00875301
GO:0009783	photosystem II antenna complex	CC		0.000706037
GO:2000280	regulation of root development	BP	0.00514674	0.000757847				0.00109683
GO:0004675	transmembrane receptor protein serine/threonine kinase activity	MF	0.000135286	0.000761749				0.000520323
GO:0046274	lignin catabolic process	BP	4.87246e-08	0.000789426				0.000227404
GO:0006972	hyperosmotic response	BP		0.000795977				0.00187043
GO:0030076	light-harvesting complex	CC		0.000801788			0.0428315
GO:0048513	animal organ development	BP		0.000825643				4.13683e-09
GO:0008705	methionine synthase activity	MF		0.000970427				0.0417105
GO:0015804	neutral amino acid transport	BP	0.0402521	0.000996646				0.0346491
GO:0015798	myo-inositol transport	BP		0.00108121
GO:0005199	structural constituent of cell wall	MF		0.00108121				0.000112182
GO:0009579	thylakoid	CC		0.00108549				0.0296307
GO:0009723	response to ethylene	BP	1.64704e-10	0.00108712				0.0312211
GO:0071918	urea transmembrane transport	BP		0.00114433		0.0229005
GO:0016616	oxidoreductase activity, acting on the CH-OH group of donors, NAD or NADP as acceptor	MF		0.00114478
GO:0051555	flavonol biosynthetic process	BP	0.0162958	0.00125379				0.00961359
GO:0019684	photosynthesis, light reaction	BP		0.00127095
GO:0051289	protein homotetramerization	BP		0.00133504
GO:0009696	salicylic acid metabolic process	BP	0.0298722	0.00133786		0.0312594	0.023056
GO:0000096	sulfur amino acid metabolic process	BP		0.00139254				0.000607478
GO:0015175	neutral amino acid transmembrane transporter activity	MF	0.0349587	0.00142098		0.0450034	0.0481327	0.0193921
GO:0010115	regulation of abscisic acid biosynthetic process	BP		0.00147209			0.0459183	0.0166646
GO:0015172	acidic amino acid transmembrane transporter activity	MF	0.0255082	0.00154927		0.0319058	0.0423997	0.0175979
GO:0009625	response to insect	BP	0.000709822	0.00172625
GO:0009800	cinnamic acid biosynthetic process	BP	4.07906e-05	0.00190472				0.00968864
GO:0009654	photosystem II oxygen evolving complex	CC		0.00203546			0.0261665
GO:0000326	protein storage vacuole	CC		0.00203546		0.0143199
GO:0050321	tau-protein kinase activity	MF		0.00212064				0.0035555
GO:0009704	de-etiolation	BP	0.00191345	0.00215758
GO:0009570	chloroplast stroma	CC		0.00231164
GO:0005432	calcium:sodium antiporter activity	MF	0.0419547	0.00231835		0.0159945
GO:0009266	response to temperature stimulus	BP		0.00239669				0.036443
GO:0080040	positive regulation of cellular response to phosphate starvation	BP		0.00240629			0.0453672
GO:0008361	regulation of cell size	BP		0.00244528				8.26133e-13
GO:0010226	response to lithium ion	BP		0.0025163
GO:0008194	UDP-glycosyltransferase activity	MF	0.000107966	0.00253486		0.0358325	0.0398954
GO:0010301	xanthoxin dehydrogenase activity	MF	0.0192467	0.00254709
GO:0047634	agmatine N4-coumaroyltransferase activity	MF	0.00736514	0.00255849			0.00449334	0.0281729
GO:0048041	focal adhesion assembly	BP	0.000279552	0.00255849				0.0371432
GO:0090355	positive regulation of auxin metabolic process	BP		0.00256085				0.0250576
GO:0090358	positive regulation of tryptophan metabolic process	BP		0.00256085				0.0250576
GO:0009639	response to red or far red light	BP		0.00256085
GO:0052546	cell wall pectin metabolic process	BP		0.00270819				0.00428695
GO:0015200	methylammonium transmembrane transporter activity	MF		0.00272899				0.048705
GO:0072489	methylammonium transmembrane transport	BP		0.00272899				0.048705
GO:0043481	anthocyanin accumulation in tissues in response to UV light	BP		0.00283411				3.12969e-16
GO:0009830	cell wall modification involved in abscission	BP		0.00291339
GO:0018685	alkane 1-monooxygenase activity	MF	0.00252683	0.0029169
GO:0016131	brassinosteroid metabolic process	BP	0.00421839	0.00293025
GO:0045548	phenylalanine ammonia-lyase activity	MF	0.000157765	0.00293262				0.0283777
GO:0009555	pollen development	BP	0.00673342	0.00311733				0.0286948
GO:0001666	response to hypoxia	BP	0.0245519	0.00319179		0.0360313	0.023056	0.00120627
GO:0044272	sulfur compound biosynthetic process	BP		0.00320268				0.0037282
GO:0010150	leaf senescence	BP		0.00322944				0.0182592
GO:0035435	phosphate ion transmembrane transport	BP		0.00328095			0.0470227	0.0367244
GO:0042834	peptidoglycan binding	MF		0.00332434				0.00162367
GO:0006011	UDP-glucose metabolic process	BP		0.00341468
GO:0016151	nickel cation binding	MF		0.00344389				0.0460559
GO:0052873	FMN reductase (NADPH) activity	MF		0.00351089		0.034275
GO:0000041	transition metal ion transport	BP	0.0358984	0.00351681				0.000153806
GO:0051180	vitamin transport	BP		0.00351681
GO:0009932	cell tip growth	BP		0.00356819				1.05158e-13
GO:0016847	1-aminocyclopropane-1-carboxylate synthase activity	MF	0.0192467	0.00356972				0.0177444
GO:0042218	1-aminocyclopropane-1-carboxylate biosynthetic process	BP	0.0192467	0.00356972				0.0177444
GO:0045300	acyl-[acyl-carrier-protein] desaturase activity	MF		0.00370477		0.0251681	0.0375946
GO:0010266	response to vitamin B1	BP		0.00371314
GO:0003854	3-beta-hydroxy-delta5-steroid dehydrogenase activity	MF	0.0398793	0.00373146				0.0447205
GO:0010427	abscisic acid binding	MF	1.922e-05	0.00373146			0.0332485	0.0113913
GO:0031410	cytoplasmic vesicle	CC	9.42286e-05	0.00373146		0.0243076	0.0423997	0.0494745
GO:0071480	cellular response to gamma radiation	BP	0.0478711	0.00390801				0.0123704
GO:0045431	flavonol synthase activity	MF	0.0118302	0.00420162				0.00735509
GO:0030091	protein repair	BP		0.00437503
GO:0071840	cellular component organization or biogenesis	BP	0.0419547	0.00442347				1.80086e-05
GO:0009645	response to low light intensity stimulus	BP		0.00460187
GO:0047134	protein-disulfide reductase activity	MF		0.00472438			0.0398954
GO:0006631	fatty acid metabolic process	BP		0.00478982				0.0307334
GO:0009964	negative regulation of flavonoid biosynthetic process	BP		0.00488077
GO:0033729	anthocyanidin reductase activity	MF		0.00488077
GO:1900377	negative regulation of secondary metabolite biosynthetic process	BP		0.00488077
GO:0052541	plant-type cell wall cellulose metabolic process	BP		0.0051268				0.00177093
GO:0034595	phosphatidylinositol phosphate 5-phosphatase activity	MF		0.00512794			0.0423997
GO:0006865	amino acid transport	BP	0.0196347	0.00517528		0.0159945
GO:0050468	reticuline oxidase activity	MF	0.00190052	0.00527665
GO:0005504	fatty acid binding	MF		0.00530498			0.0423997	0.0296307
GO:0006857	oligopeptide transport	BP	0.0404197	0.00534519
GO:0009873	ethylene-activated signaling pathway	BP	2.10181e-09	0.00534519		0.0154637		0.000779125
GO:0003871	5-methyltetrahydropteroyltriglutamate-homocysteine S-methyltransferase activity	MF		0.00546981
GO:0006096	glycolytic process	BP		0.00574839				0.000878686
GO:0010196	nonphotochemical quenching	BP		0.00599954
GO:0080113	regulation of seed growth	BP		0.00611114			0.0423997	0.0172138
GO:0052635	C-20 gibberellin 2-beta-dioxygenase activity	MF		0.00618963
GO:0043648	dicarboxylic acid metabolic process	BP		0.00634525
GO:0010304	PSII associated light-harvesting complex II catabolic process	BP		0.0063551
GO:0009646	response to absence of light	BP	0.00312726	0.00637398		0.0232495
GO:0048480	stigma development	BP	0.000615227	0.00645714				0.0330499
GO:0009624	response to nematode	BP	0.00140514	0.00654831				7.87981e-08
GO:0051245	negative regulation of cellular defense response	BP	0.0372145	0.00660018
GO:0009825	multidimensional cell growth	BP		0.00660018				1.18022e-11
GO:0009686	gibberellin biosynthetic process	BP		0.00666906				0.000607478
GO:0016740	transferase activity	MF		0.00684592
GO:0010205	photoinhibition	BP		0.00699371
GO:0042128	nitrate assimilation	BP	0.0384462	0.00708601
GO:0030163	protein catabolic process	BP	0.0137869	0.00710847
GO:0048281	inflorescence morphogenesis	BP		0.00721318
GO:0042183	formate catabolic process	BP		0.00736294
GO:0080160	selenate transport	BP	0.0255082	0.00736918
GO:0071248	cellular response to metal ion	BP		0.00736918				0.0138853
GO:0006696	ergosterol biosynthetic process	BP		0.00760561
GO:0032440	2-alkenal reductase [NAD(P)+] activity	MF		0.00764376				1.39885e-05
GO:0004719	protein-L-isoaspartate (D-aspartate) O-methyltransferase activity	MF		0.00783823		0.0429464
GO:0050518	2-C-methyl-D-erythritol 4-phosphate cytidylyltransferase activity	MF		0.0078835
GO:0002213	defense response to insect	BP	0.000285571	0.00808908
GO:0009749	response to glucose	BP		0.00821948				0.0134025
GO:0006259	DNA metabolic process	BP		0.00826734				0.000379141
GO:0009635	response to herbicide	BP	0.0332542	0.0083633
GO:0015297	antiporter activity	MF	0.0416041	0.00842858				0.0112249
GO:0010197	polar nucleus fusion	BP	0.00252579	0.00856606
GO:0043069	negative regulation of programmed cell death	BP	1.42567e-12	0.00856654		0.0207817
GO:0043090	amino acid import	BP	0.00415052	0.00874743				0.000174863
GO:0010286	heat acclimation	BP	0.0434021	0.00880842
GO:0016705	oxidoreductase activity, acting on paired donors, with incorporation or reduction of molecular oxygen	MF	0.00203687	0.00890628
GO:0006275	regulation of DNA replication	BP		0.00918299
GO:0005978	glycogen biosynthetic process	BP		0.00939912
GO:0004864	protein phosphatase inhibitor activity	MF	2.67487e-05	0.00948146				0.00252835
GO:0010181	FMN binding	MF	0.00654045	0.00948146		0.0251681		0.0181889
GO:0006855	drug transmembrane transport	BP	0.000214452	0.00953376				0.00866585
GO:0010016	shoot system morphogenesis	BP		0.00953376			0.0470912
GO:0010345	suberin biosynthetic process	BP		0.0096748				0.0306708
GO:0090376	seed trichome differentiation	BP		0.00984183				0.0140961
GO:0015837	amine transport	BP	0.0402521	0.00989195				0.00106581
GO:0016137	glycoside metabolic process	BP		0.00992675
GO:0048569	post-embryonic animal organ development	BP	0.0170991	0.00992675				3.93842e-17
GO:0033759	flavone synthase activity	MF	6.27282e-05	0.00998346				0.0034184
GO:0008271	secondary active sulfate transmembrane transporter activity	MF		0.0100047
GO:0047213	anthocyanidin 3-O-glucosyltransferase activity	MF		0.010349
GO:0004784	superoxide dismutase activity	MF		0.010349
GO:0045003	double-strand break repair via synthesis-dependent strand annealing	BP		0.010349				0.0312439
GO:0006084	acetyl-CoA metabolic process	BP		0.010373				2.88025e-06
GO:0042545	cell wall modification	BP		0.0104117				3.06476e-05
GO:0009013	succinate-semialdehyde dehydrogenase [NAD(P)+] activity	MF		0.01079
GO:0008466	glycogenin glucosyltransferase activity	MF	0.0478711	0.0107977
GO:0052731	phosphocholine phosphatase activity	MF		0.0107977
GO:0052732	phosphoethanolamine phosphatase activity	MF		0.0107977
GO:0071369	cellular response to ethylene stimulus	BP		0.010911
GO:0002238	response to molecule of fungal origin	BP		0.0109503				0.0417105
GO:0010817	regulation of hormone levels	BP		0.0109824				3.63573e-06
GO:0009349	riboflavin synthase complex	CC		0.01104
GO:0015152	glucose-6-phosphate transmembrane transporter activity	MF		0.0111218				0.0181889
GO:0015760	glucose-6-phosphate transport	BP		0.0111218				0.0181889
GO:0004869	cysteine-type endopeptidase inhibitor activity	MF		0.0111218
GO:0048527	lateral root development	BP	0.0260021	0.0111218				0.00276725
GO:0009450	gamma-aminobutyric acid catabolic process	BP		0.0112954
GO:0043674	columella	CC		0.0113386		0.0355959
GO:0071493	cellular response to UV-B	BP		0.0113386
GO:2000032	regulation of secondary shoot formation	BP	0.0322955	0.0115706
GO:0003983	UTP:glucose-1-phosphate uridylyltransferase activity	MF		0.0116206
GO:0043765	T/G mismatch-specific endonuclease activity	MF		0.0117786				0.0037282
GO:0007568	aging	BP		0.0118639
GO:0042178	xenobiotic catabolic process	BP		0.0122502
GO:0050505	hydroquinone glucosyltransferase activity	MF		0.0122502
GO:0019253	reductive pentose-phosphate cycle	BP		0.0122502
GO:0042409	caffeoyl-CoA O-methyltransferase activity	MF		0.0122942
GO:0009978	allene oxide synthase activity	MF		0.0124344				0.0437317
GO:0019373	epoxygenase P450 pathway	BP		0.0124344				0.0437317
GO:0047987	hydroperoxide dehydratase activity	MF		0.0124344				0.0437317
GO:0071280	cellular response to copper ion	BP		0.0124344
GO:0015144	carbohydrate transmembrane transporter activity	MF		0.0127201
GO:0009642	response to light intensity	BP	0.00207097	0.0128509			0.0494
GO:0042539	hypotonic salinity response	BP		0.0128945
GO:0051567	histone H3-K9 methylation	BP		0.0129037				0.0262498
GO:0070417	cellular response to cold	BP		0.012957			0.0147423
GO:0015115	silicate transmembrane transporter activity	MF		0.0130123
GO:0015708	silicic acid import across plasma membrane	BP		0.0130123
GO:0009670	triose-phosphate:phosphate antiporter activity	MF	0.0322955	0.0130146
GO:0003861	3-isopropylmalate dehydratase activity	MF		0.0130146
GO:0009707	chloroplast outer membrane	CC		0.013199				0.0331819
GO:1902358	sulfate transmembrane transport	BP		0.0132212
GO:0006733	oxidoreduction coenzyme metabolic process	BP		0.0132904				0.0431497
GO:0003700	DNA-binding transcription factor activity	MF	0.000145758	0.0135305				9.51171e-09
GO:0005986	sucrose biosynthetic process	BP	0.0147112	0.0135875
GO:0004198	calcium-dependent cysteine-type endopeptidase activity	MF		0.0138789				0.00479691
GO:0030095	chloroplast photosystem II	CC		0.0140437
GO:0004473	malate dehydrogenase (decarboxylating) (NADP+) activity	MF	0.0037422	0.0140437
GO:0000976	transcription regulatory region sequence-specific DNA binding	MF		0.0141308
GO:0050403	trans-zeatin O-beta-D-glucosyltransferase activity	MF		0.0142053		0.0490008
GO:0007142	male meiosis II	BP		0.0142533
GO:0046982	protein heterodimerization activity	MF		0.0142831				0.000342648
GO:0010109	regulation of photosynthesis	BP		0.0148056				0.00805538
GO:0050502	cis-zeatin O-beta-D-glucosyltransferase activity	MF		0.0149916
GO:0033897	ribonuclease T2 activity	MF		0.0151805				0.00232925
GO:0009058	biosynthetic process	BP		0.0153786		0.0312594	0.0398954
GO:0019904	protein domain specific binding	MF		0.0154754
GO:0004315	3-oxoacyl-[acyl-carrier-protein] synthase activity	MF		0.0156575				0.0012856
GO:0015112	nitrate transmembrane transporter activity	MF		0.0158588
GO:0016114	terpenoid biosynthetic process	BP		0.0159103
GO:0015120	phosphoglycerate transmembrane transporter activity	MF		0.0159103				0.0272062
GO:0015713	phosphoglycerate transmembrane transport	BP		0.0159103				0.0272062
GO:0015979	photosynthesis	BP		0.0159103			0.0399186
GO:0009538	photosystem I reaction center	CC		0.0159103
GO:0009698	phenylpropanoid metabolic process	BP	0.0468995	0.015939				0.00441161
GO:0010260	animal organ senescence	BP		0.0161353				0.00419224
GO:0047037	salutaridine reductase (NADPH) activity	MF	0.000385289	0.0164021		0.00448756	0.023201	0.0494745
GO:0042721	TIM22 mitochondrial import inner membrane insertion complex	CC		0.0165531
GO:0098599	palmitoyl hydrolase activity	MF		0.0165573
GO:1902074	response to salt	BP		0.0165573
GO:0045430	chalcone isomerase activity	MF		0.0165573
GO:0007190	activation of adenylate cyclase activity	BP		0.0166447
GO:0005975	carbohydrate metabolic process	BP		0.017065				0.00916702
GO:0000981	DNA-binding transcription factor activity, RNA polymerase II-specific	MF		0.0171171
GO:0008863	formate dehydrogenase (NAD+) activity	MF		0.0172305
GO:0006766	vitamin metabolic process	BP		0.017276				0.0192102
GO:0016758	transferase activity, transferring hexosyl groups	MF	0.0402521	0.0173693
GO:0004029	aldehyde dehydrogenase (NAD+) activity	MF		0.0175118
GO:0071732	cellular response to nitric oxide	BP		0.0177734
GO:0006555	methionine metabolic process	BP		0.0178799				0.0344233
GO:0044209	AMP salvage	BP		0.0182964		0.0425353	0.0472626	0.0038157
GO:0060862	negative regulation of floral organ abscission	BP		0.0183516
GO:0050734	hydroxycinnamoyltransferase activity	MF	0.0384462	0.0184999		0.0427997	0.0241201
GO:0030245	cellulose catabolic process	BP		0.0186056				0.00107899
GO:0047036	codeinone reductase (NADPH) activity	MF		0.0186056
GO:0047939	L-glucuronate reductase activity	MF		0.0186056
GO:0050388	uronate dehydrogenase activity	MF		0.0186056
GO:0052634	C-19 gibberellin 2-beta-dioxygenase activity	MF		0.0187936			0.0423997	0.0101168
GO:0015121	phosphoenolpyruvate:phosphate antiporter activity	MF	0.0384462	0.0188863
GO:0071495	cellular response to endogenous stimulus	BP		0.0190765
GO:0004791	thioredoxin-disulfide reductase activity	MF		0.0191277			0.0423997
GO:0010597	green leaf volatile biosynthetic process	BP	0.0384462	0.0196668
GO:0006556	S-adenosylmethionine biosynthetic process	BP		0.0197364
GO:0051754	meiotic sister chromatid cohesion, centromeric	BP		0.0197584
GO:0010091	trichome branching	BP		0.0199158
GO:0071423	malate transmembrane transport	BP		0.0199522
GO:0034389	lipid droplet organization	BP		0.0200798			0.0421472
GO:0001653	peptide receptor activity	MF	0.0298722	0.0205027
GO:0000906	6,7-dimethyl-8-ribityllumazine synthase activity	MF		0.0207758
GO:0001558	regulation of cell growth	BP		0.0209684
GO:0071457	cellular response to ozone	BP		0.0209999
GO:0070191	methionine-R-sulfoxide reductase activity	MF		0.0210927
GO:0048838	release of seed from dormancy	BP		0.0210927
GO:0042631	cellular response to water deprivation	BP	0.00418659	0.0210982
GO:0009863	salicylic acid mediated signaling pathway	BP	1.47396e-05	0.0210982
GO:0035436	triose phosphate transmembrane transport	BP		0.0213082				0.0367244
GO:0080164	regulation of nitric oxide metabolic process	BP		0.0215419			0.0356657
GO:0030527	structural constituent of chromatin	MF		0.0216402
GO:0010344	seed oilbody biogenesis	BP		0.0219233
GO:0050482	arachidonic acid secretion	BP		0.0219233				0.0211243
GO:0047890	flavanone 4-reductase activity	MF		0.0219543
GO:0010242	oxygen evolving activity	MF		0.0221451		0.0207817
GO:0009644	response to high light intensity	BP		0.0222765
GO:0030133	transport vesicle	CC	0.0332542	0.0222765
GO:0048448	stamen morphogenesis	BP		0.0222765		0.0207817
GO:0006559	L-phenylalanine catabolic process	BP	0.00103732	0.0223227
GO:0030744	luteolin O-methyltransferase activity	MF		0.0223227				0.0442099
GO:0030755	quercetin 3-O-methyltransferase activity	MF		0.0223227				0.0442099
GO:0003960	NADPH:quinone reductase activity	MF		0.0224982
GO:0003999	adenine phosphoribosyltransferase activity	MF		0.0225184				0.00114648
GO:1904667	negative regulation of ubiquitin protein ligase activity	BP		0.0225408
GO:0010154	fruit development	BP		0.0228787
GO:0052837	thiazole biosynthetic process	BP		0.0229048
GO:0009643	photosynthetic acclimation	BP		0.0229222			0.0447911
GO:0047150	betaine-homocysteine S-methyltransferase activity	MF		0.0231905
GO:0045552	dihydrokaempferol 4-reductase activity	MF		0.0232128
GO:1903647	negative regulation of chlorophyll catabolic process	BP		0.0236824
GO:0016854	racemase and epimerase activity	MF		0.0240018
GO:0043495	protein-membrane adaptor activity	MF	0.0332542	0.0240018
GO:0052747	sinapyl alcohol dehydrogenase activity	MF		0.0244013
GO:0004657	proline dehydrogenase activity	MF		0.0247453
GO:0033772	flavonoid 3',5'-hydroxylase activity	MF		0.0247946
GO:0010241	ent-kaurene oxidation to kaurenoic acid	BP		0.0247946
GO:0051701	interaction with host	BP		0.0247946				0.0487957
GO:0010133	proline catabolic process to glutamate	BP		0.0248836
GO:0015114	phosphate ion transmembrane transporter activity	MF		0.0250001				0.0342898
GO:0004353	glutamate dehydrogenase [NAD(P)+] activity	MF		0.0250001
GO:0033095	aleurone grain	CC		0.0250104			0.0475803
GO:0015690	aluminum cation transport	BP		0.0250285
GO:0009735	response to cytokinin	BP		0.0251049				0.000369273
GO:0004337	geranyltranstransferase activity	MF		0.0253069				0.0281729
GO:0045337	farnesyl diphosphate biosynthetic process	BP		0.0253069				0.0281729
GO:0046620	regulation of organ growth	BP		0.0253445
GO:0010327	acetyl CoA:(Z)-3-hexen-1-ol acetyltransferase activity	MF		0.0254797
GO:0009791	post-embryonic development	BP		0.0264029		0.0358325
GO:0042973	glucan endo-1,3-beta-D-glucosidase activity	MF		0.0264029				0.0203931
GO:0033743	peptide-methionine (R)-S-oxide reductase activity	MF		0.0264697
GO:0010215	cellulose microfibril organization	BP		0.0269131
GO:0034599	cellular response to oxidative stress	BP		0.0270829
GO:0051258	protein polymerization	BP		0.0272117
GO:0051553	flavone biosynthetic process	BP	0.000615227	0.0274714				0.00155822
GO:0051865	protein autoubiquitination	BP	0.0498295	0.0276919
GO:0006109	regulation of carbohydrate metabolic process	BP		0.0276947
GO:0048856	anatomical structure development	BP		0.0276953				0.0153912
GO:0047461	(+)-delta-cadinene synthase activity	MF	0.0134721	0.0281689
GO:0016328	lateral plasma membrane	CC		0.0281689
GO:0006108	malate metabolic process	BP		0.0281689		0.0485473
GO:0015994	chlorophyll metabolic process	BP		0.0281689
GO:0034220	ion transmembrane transport	BP		0.0282164
GO:0045793	positive regulation of cell size	BP		0.0282467			0.0119814
GO:0048451	petal formation	BP		0.0282467				0.0429826
GO:0009108	coenzyme biosynthetic process	BP		0.0287569
GO:0051225	spindle assembly	BP		0.0287569
GO:0016656	monodehydroascorbate reductase (NADH) activity	MF	0.00731188	0.0289395				0.0103505
GO:0019825	oxygen binding	MF	0.000431293	0.0290816		0.0499095		0.00770941
GO:0008810	cellulase activity	MF		0.0295967				0.000520323
GO:0016298	lipase activity	MF		0.0299589			0.0494
GO:0044262	cellular carbohydrate metabolic process	BP		0.0300316				0.000358463
GO:0045087	innate immune response	BP	0.00839298	0.0300316			0.0423997	0.011476
GO:0000747	conjugation with cellular fusion	BP	0.000107966	0.0301794
GO:0019722	calcium-mediated signaling	BP		0.0303236
GO:0009767	photosynthetic electron transport chain	BP	0.0204194	0.0308051
GO:0002084	protein depalmitoylation	BP		0.0308737
GO:0004383	guanylate cyclase activity	MF		0.0308737				0.038906
GO:0006182	cGMP biosynthetic process	BP		0.0308737				0.038906
GO:0009407	toxin catabolic process	BP	9.29456e-06	0.0309122		0.0363904		0.00437081
GO:0000170	sphingosine hydroxylase activity	MF	0.000941696	0.0309122
GO:0006633	fatty acid biosynthetic process	BP		0.0309637				0.00268575
GO:0015696	ammonium transport	BP	0.023577	0.0309859
GO:0045551	cinnamyl-alcohol dehydrogenase activity	MF		0.0311861
GO:0008574	ATP-dependent microtubule motor activity, plus-end-directed	MF		0.031232
GO:0043085	positive regulation of catalytic activity	BP		0.031232
GO:0047254	2,4-dihydroxy-7-methoxy-2H-1,4-benzoxazin-3(4H)-one 2-D-glucosyltransferase activity	MF		0.031232
GO:0047807	cytokinin 7-beta-glucosyltransferase activity	MF		0.031232
GO:0080062	cytokinin 9-beta-glucosyltransferase activity	MF		0.031232
GO:0070925	organelle assembly	BP		0.031881
GO:0009517	PSII associated light-harvesting complex II	CC		0.0322294
GO:0005819	spindle	CC		0.0322294
GO:0046164	alcohol catabolic process	BP		0.0323063				0.00182868
GO:0006817	phosphate ion transport	BP		0.0326345
GO:0009965	leaf morphogenesis	BP		0.0330239				0.00111092
GO:0009636	response to toxic substance	BP	0.000536096	0.0334432			0.0269819	4.94551e-05
GO:0009814	defense response, incompatible interaction	BP	0.00991982	0.0334432
GO:0005955	calcineurin complex	CC		0.0336369
GO:0015035	protein disulfide oxidoreductase activity	MF		0.0337914		0.0253456	0.0459183
GO:0051783	regulation of nuclear division	BP		0.0340395
GO:0071454	cellular response to anoxia	BP		0.0347089
GO:0009617	response to bacterium	BP	0.00326749	0.0347089				0.0113895
GO:0071577	zinc ion transmembrane transport	BP		0.0348778
GO:0032879	regulation of localization	BP		0.0348778
GO:0042157	lipoprotein metabolic process	BP		0.0349629
GO:0010017	red or far-red light signaling pathway	BP		0.0350394			0.0494
GO:0030968	endoplasmic reticulum unfolded protein response	BP	1.08306e-11	0.0351069
GO:0051188	cofactor biosynthetic process	BP		0.035298
GO:0032556	pyrimidine deoxyribonucleotide binding	MF		0.0354869
GO:0009496	plastoquinol--plastocyanin reductase activity	MF		0.0358544			0.0423997
GO:0005458	GDP-mannose transmembrane transporter activity	MF		0.0358967
GO:0009886	post-embryonic animal morphogenesis	BP		0.0358967				1.8299e-13
GO:0050691	regulation of defense response to virus by host	BP	2.52692e-06	0.0358967
GO:0046434	organophosphate catabolic process	BP		0.0359447
GO:0009705	plant-type vacuole membrane	CC	0.0269787	0.0359447
GO:0009536	plastid	CC		0.0363043				9.56771e-05
GO:0005385	zinc ion transmembrane transporter activity	MF		0.0363259
GO:0009685	gibberellin metabolic process	BP	0.000107966	0.0363912				0.0269133
GO:0004067	asparaginase activity	MF		0.0363912
GO:0008889	glycerophosphodiester phosphodiesterase activity	MF		0.0363912				0.0449868
GO:0030154	cell differentiation	BP		0.0363912				0.0229088
GO:0010077	maintenance of inflorescence meristem identity	BP		0.0364838
GO:0018874	benzoate metabolic process	BP	0.00932949	0.0368877
GO:0052639	salicylic acid glucosyltransferase (ester-forming) activity	MF	0.00932949	0.0368877
GO:0052640	salicylic acid glucosyltransferase (glucoside-forming) activity	MF	0.00932949	0.0368877
GO:0052641	benzoic acid glucosyltransferase activity	MF	0.00932949	0.0368877
GO:0080046	quercetin 4'-O-glucosyltransferase activity	MF		0.0371468			0.0168286
GO:0002020	protease binding	MF		0.0378375
GO:0033984	indole-3-glycerol-phosphate lyase activity	MF		0.0378375				0.0296307
GO:0009887	animal organ morphogenesis	BP		0.0378375				0.00191093
GO:0009786	regulation of asymmetric cell division	BP	0.000941696	0.0378375				0.0473013
GO:0043086	negative regulation of catalytic activity	BP		0.0378375				0.0176045
GO:0004048	anthranilate phosphoribosyltransferase activity	MF	0.0255082	0.0378375
GO:0044247	cellular polysaccharide catabolic process	BP		0.0378375			0.0444207
GO:0017111	nucleoside-triphosphatase activity	MF	0.0162958	0.0379524
GO:0006695	cholesterol biosynthetic process	BP		0.0379605
GO:0000305	response to oxygen radical	BP	0.00233741	0.0384079		0.0287973
GO:0009641	shade avoidance	BP		0.0388993
GO:1901657	glycosyl compound metabolic process	BP		0.0391543
GO:0006694	steroid biosynthetic process	BP		0.0391543
GO:0009832	plant-type cell wall biogenesis	BP		0.0391563				4.39218e-09
GO:0047622	adenosine nucleosidase activity	MF		0.0392275
GO:0047668	amygdalin beta-glucosidase activity	MF		0.0397922
GO:0070402	NADPH binding	MF		0.0402314
GO:0071484	cellular response to light intensity	BP		0.040334
GO:0072593	reactive oxygen species metabolic process	BP		0.0406552
GO:0004748	ribonucleoside-diphosphate reductase activity, thioredoxin disulfide as acceptor	MF		0.0408223
GO:0009186	deoxyribonucleoside diphosphate metabolic process	BP		0.0409058
GO:0099080	supramolecular complex	CC		0.0410128
GO:0018119	peptidyl-cysteine S-nitrosylation	BP		0.0410511
GO:0004478	methionine adenosyltransferase activity	MF		0.0410511
GO:0043269	regulation of ion transport	BP	0.0212043	0.041237
GO:0043562	cellular response to nitrogen levels	BP	0.00500212	0.041237
GO:0004364	glutathione transferase activity	MF	0.00764586	0.0421197
GO:0000788	nuclear nucleosome	CC		0.0425992				0.00729104
GO:2000117	negative regulation of cysteine-type endopeptidase activity	BP		0.0428844		0.0312594	0.0252425
GO:0019323	pentose catabolic process	BP		0.0428844
GO:0010262	somatic embryogenesis	BP		0.0428844
GO:0005126	cytokine receptor binding	MF		0.0428844
GO:0004375	glycine dehydrogenase (decarboxylating) activity	MF		0.0431165
GO:0043168	anion binding	MF		0.0431281
GO:0019438	aromatic compound biosynthetic process	BP		0.0438679
GO:0016210	naringenin-chalcone synthase activity	MF		0.0441941
GO:0050366	tyramine N-feruloyltransferase activity	MF		0.0441941
GO:0004161	dimethylallyltranstransferase activity	MF		0.0448581
GO:0008801	beta-phosphoglucomutase activity	MF		0.0448697
GO:0030048	actin filament-based movement	BP		0.0452917
GO:0047568	3-oxo-5-beta-steroid 4-dehydrogenase activity	MF		0.0454699
GO:0047787	delta4-3-oxosteroid 5beta-reductase activity	MF		0.0454699
GO:0045486	naringenin 3-dioxygenase activity	MF		0.0454699				0.0339809
GO:0052689	carboxylic ester hydrolase activity	MF		0.0454699			0.0375946	0.00399664
GO:0031210	phosphatidylcholine binding	MF		0.0454704
GO:0051607	defense response to virus	BP		0.0454704
GO:0010350	cellular response to magnesium starvation	BP		0.0457812		0.0358325
GO:0071286	cellular response to magnesium ion	BP		0.0457812		0.0358325
GO:0050350	trihydroxystilbene synthase activity	MF		0.046033
GO:0050790	regulation of catalytic activity	BP		0.0460845
GO:0036094	small molecule binding	MF		0.0461546
GO:0008762	UDP-N-acetylmuramate dehydrogenase activity	MF	0.00415052	0.0464985
GO:0004047	aminomethyltransferase activity	MF		0.0467057
GO:0016410	N-acyltransferase activity	MF	0.044942	0.0467092
GO:0003989	acetyl-CoA carboxylase activity	MF		0.0467163
GO:0033799	myricetin 3'-O-methyltransferase activity	MF		0.0469549
GO:0034756	regulation of iron ion transport	BP		0.0470546
GO:0050486	intramolecular transferase activity, transferring hydroxy groups	MF		0.0476154
GO:0005544	calcium-dependent phospholipid binding	MF		0.0476154		0.0358325
GO:0055062	phosphate ion homeostasis	BP	0.000118142	0.0476154				0.0301488
GO:0006168	adenine salvage	BP		0.0476154				0.00940931
GO:0004318	enoyl-[acyl-carrier-protein] reductase (NADH) activity	MF		0.0476154
GO:0016631	enoyl-[acyl-carrier-protein] reductase activity	MF		0.0476154
GO:0010941	regulation of cell death	BP		0.0476779		0.00727818	0.0423997
GO:0090332	stomatal closure	BP		0.0481432
GO:0089722	phosphoenolpyruvate transmembrane transport	BP		0.0481432
GO:0031969	chloroplast membrane	CC		0.0482068
GO:0009734	auxin-activated signaling pathway	BP		0.0482068				1.9392e-12
GO:0017015	regulation of transforming growth factor beta receptor signaling pathway	BP		0.0482334
GO:0043668	exine	CC		0.0484744				0.0254078
GO:0003682	chromatin binding	MF		0.0485421
GO:0046653	tetrahydrofolate metabolic process	BP		0.0485421
GO:0009740	gibberellic acid mediated signaling pathway	BP		0.0486111				3.28955e-08
GO:0010421	hydrogen peroxide-mediated programmed cell death	BP		0.0488433
GO:0045485	omega-6 fatty acid desaturase activity	MF	0.0322955	0.0489136		0.0358325
GO:0010052	guard cell differentiation	BP		0.048968				0.0128753
GO:0007043	cell-cell junction assembly	BP		0.0491668
GO:0016711	flavonoid 3'-monooxygenase activity	MF		0.0491668				0.0177444
GO:0044275	cellular carbohydrate catabolic process	BP	0.0281906	0.0494503				0.00995392
GO:1990570	GDP-mannose transmembrane transport	BP		0.0496741
GO:0004834	tryptophan synthase activity	MF				0.00136915	0.0399186
GO:0048544	recognition of pollen	BP	7.84185e-09			0.00517054	0.0261665
GO:0000162	tryptophan biosynthetic process	BP				0.00727818
GO:0005884	actin filament	CC				0.00727818
GO:0042078	germ-line stem cell division	BP				0.00727818
GO:0008083	growth factor activity	MF				0.00735011	0.0147423	0.0251968
GO:0042445	hormone metabolic process	BP				0.00840326	0.00449334
GO:0006030	chitin metabolic process	BP				0.0109815	0.0170935
GO:0009547	plastid ribosome	CC				0.012061	0.0174552
GO:0070921	regulation of production of siRNA involved in chromatin silencing by small RNA	BP				0.013334	0.0187229
GO:0016630	protochlorophyllide reductase activity	MF				0.013334
GO:0046912	transferase activity, transferring acyl groups, acyl groups converted into alkyl on transfer	MF				0.0147201	0.0444207	0.0384115
GO:0006807	nitrogen compound metabolic process	BP				0.0204634
GO:0008506	sucrose:proton symporter activity	MF	0.0255082			0.0205826		0.0378201
GO:0030042	actin filament depolymerization	BP				0.0205826
GO:1901073	glucosamine-containing compound biosynthetic process	BP				0.0207817	0.0297372
GO:0047893	flavonol 3-O-glucosyltransferase activity	MF				0.0207817	0.0290111
GO:0007265	Ras protein signal transduction	BP				0.0207817		0.010427
GO:0005344	oxygen carrier activity	MF				0.0207817		0.0397469
GO:0000916	actomyosin contractile ring contraction	BP				0.0207817
GO:0007298	border follicle cell migration	BP				0.0207817
GO:0007317	regulation of pole plasm oskar mRNA localization	BP				0.0207817
GO:0007349	cellularization	BP				0.0207817
GO:0007394	dorsal closure, elongation of leading edge cells	BP				0.0207817
GO:0008103	oocyte microtubule cytoskeleton polarization	BP				0.0207817
GO:0016360	sensory organ precursor cell fate determination	BP				0.0207817
GO:0019730	antimicrobial humoral response	BP				0.0207817
GO:0030718	germ-line stem cell population maintenance	BP				0.0207817
GO:0030723	ovarian fusome organization	BP				0.0207817
GO:0034334	adherens junction maintenance	BP				0.0207817
GO:0043195	terminal bouton	CC				0.0207817
GO:0045169	fusome	CC				0.0207817
GO:0046664	dorsal closure, amnioserosa morphology change	BP				0.0207817
GO:0048136	male germ-line cyst formation	BP				0.0207817
GO:0048137	spermatocyte division	BP				0.0207817
GO:0048210	Golgi vesicle fusion to target membrane	BP				0.0207817
GO:0050807	regulation of synapse organization	BP				0.0207817
GO:0070732	spindle envelope	CC				0.0207817
GO:0061635	regulation of protein complex stability	BP				0.0207817
GO:0008188	neuropeptide receptor activity	MF				0.0207817
GO:0008356	asymmetric cell division	BP				0.0207817		0.000166244
GO:0045493	xylan catabolic process	BP	0.00421839			0.0207817	0.0168286	0.0124836
GO:2000889	cellodextrin metabolic process	BP	0.00421839			0.0207817	0.0168286	0.0124836
GO:0050308	sugar-phosphatase activity	MF				0.0207817
GO:0080168	abscisic acid transport	BP				0.0207817		0.011476
GO:1901678	iron coordination entity transport	BP				0.0207817
GO:0005315	inorganic phosphate transmembrane transporter activity	MF				0.0212814
GO:0097306	cellular response to alcohol	BP				0.0218101
GO:0043879	glycolate transmembrane transporter activity	MF				0.0218101
GO:0097339	glycolate transmembrane transport	BP				0.0218101
GO:1901974	glycerate transmembrane transporter activity	MF				0.0218101
GO:1901975	glycerate transmembrane transport	BP				0.0218101
GO:0018489	vanillate monooxygenase activity	MF				0.0218101
GO:0007065	male meiosis sister chromatid cohesion	BP				0.0218101
GO:0035252	UDP-xylosyltransferase activity	MF				0.0222776	0.0494	0.0188874
GO:0030570	pectate lyase activity	MF				0.0229005
GO:0034059	response to anoxia	BP	0.00932949			0.0232495
GO:0016101	diterpenoid metabolic process	BP				0.0252297	0.0119814	0.0197775
GO:0035865	cellular response to potassium ion	BP				0.0253584
GO:0009571	proplastid stroma	CC				0.025407
GO:0004590	orotidine-5'-phosphate decarboxylase activity	MF				0.0262661
GO:0015977	carbon fixation	BP				0.0267211
GO:0050829	defense response to Gram-negative bacterium	BP				0.0268482		0.0407541
GO:0042923	neuropeptide binding	MF				0.0294927
GO:0016811	hydrolase activity, acting on carbon-nitrogen (but not peptide) bonds, in linear amides	MF				0.0294927
GO:0016887	ATPase activity	MF				0.0294927
GO:0043201	response to leucine	BP				0.0294927
GO:0080052	response to histidine	BP				0.0294927
GO:0080053	response to phenylalanine	BP				0.0294927
GO:0008964	phosphoenolpyruvate carboxylase activity	MF				0.0298497
GO:0009061	anaerobic respiration	BP				0.0312594	0.0297372	0.0249047
GO:0016301	kinase activity	MF				0.0312594	0.0428315
GO:0005337	nucleoside transmembrane transporter activity	MF				0.0312594		0.0387824
GO:0043549	regulation of kinase activity	BP				0.0312594		0.0346491
GO:0006107	oxaloacetate metabolic process	BP				0.0314825		0.0258052
GO:0002700	regulation of production of molecular mediator of immune response	BP				0.0320725	0.0423997
GO:0055086	nucleobase-containing small molecule metabolic process	BP				0.0323392
GO:0098754	detoxification	BP				0.0326409	0.0116111
GO:0016769	transferase activity, transferring nitrogenous groups	MF				0.0333022
GO:0009346	citrate lyase complex	CC				0.0345143	0.0423997	0.00171017
GO:0010277	chlorophyllide a oxygenase [overall] activity	MF				0.0345143
GO:0004588	orotate phosphoribosyltransferase activity	MF				0.0358325
GO:0008235	metalloexopeptidase activity	MF				0.0358325		0.00965961
GO:0030096	plasma membrane-derived thylakoid photosystem II	CC				0.0358325	0.0423997
GO:0071219	cellular response to molecule of bacterial origin	BP				0.0358325
GO:0042626	ATPase-coupled transmembrane transporter activity	MF				0.0358325
GO:0042351	'de novo' GDP-L-fucose biosynthetic process	BP				0.0358325
GO:0048169	regulation of long-term neuronal synaptic plasticity	BP				0.0358325
GO:0051223	regulation of protein transport	BP				0.0358325
GO:0004888	transmembrane signaling receptor activity	MF	0.0131958			0.0358325
GO:0031532	actin cytoskeleton reorganization	BP				0.0358325
GO:0006769	nicotinamide metabolic process	BP				0.0359637
GO:0055074	calcium ion homeostasis	BP				0.0359637		0.0327319
GO:0070840	dynein complex binding	MF				0.0359637
GO:0022890	inorganic cation transmembrane transporter activity	MF	0.00421839			0.0359658
GO:0046208	spermine catabolic process	BP				0.0359658
GO:0046592	polyamine oxidase activity	MF				0.0359658
GO:0052894	norspermine:oxygen oxidoreductase activity	MF				0.0359658
GO:0052895	N1-acetylspermine:oxygen oxidoreductase (N1-acetylspermidine-forming) activity	MF				0.0359658
GO:0052901	spermine:oxygen oxidoreductase (spermidine-forming) activity	MF				0.0359658
GO:0046863	ribulose-1,5-bisphosphate carboxylase/oxygenase activator activity	MF				0.0360313
GO:0071614	linoleic acid epoxygenase activity	MF				0.0360313	0.0423997
GO:0004619	phosphoglycerate mutase activity	MF				0.0363062	0.0444207
GO:0045298	tubulin complex	CC				0.0363904
GO:0007066	female meiosis sister chromatid cohesion	BP				0.0363904
GO:0004140	dephospho-CoA kinase activity	MF				0.0363904	0.00619388
GO:0045088	regulation of innate immune response	BP				0.0386667
GO:0009888	tissue development	BP				0.0387433
GO:0009901	anther dehiscence	BP	0.0477743			0.0398557
GO:0060776	simple leaf morphogenesis	BP				0.0398937		0.0135787
GO:0019219	regulation of nucleobase-containing compound metabolic process	BP				0.0409314
GO:0006073	cellular glucan metabolic process	BP				0.0409314	0.0190497
GO:0009942	longitudinal axis specification	BP				0.042189
GO:0048367	shoot system development	BP				0.0441629		0.00104566
GO:0009759	indole glucosinolate biosynthetic process	BP	0.00517761			0.0444225
GO:0016851	magnesium chelatase activity	MF				0.0447922
GO:0030504	inorganic diphosphate transmembrane transporter activity	MF				0.0450034		0.023326
GO:0030505	inorganic diphosphate transport	BP				0.0450034		0.023326
GO:0031219	levanase activity	MF	0.00517761			0.0458668	0.0481327
GO:0051670	inulinase activity	MF	0.00517761			0.0458668	0.0481327
GO:0071836	nectar secretion	BP	0.00517761			0.0458668	0.0481327
GO:0061630	ubiquitin protein ligase activity	MF				0.0458898
GO:0031347	regulation of defense response	BP	0.000696527			0.0461767
GO:0008378	galactosyltransferase activity	MF	0.00191345			0.0466927		0.0242772
GO:0080025	phosphatidylinositol-3,5-bisphosphate binding	MF				0.0468227	0.0494
GO:0007154	cell communication	BP				0.0471011
GO:0070988	demethylation	BP				0.0479944
GO:0008936	nicotinamidase activity	MF				0.0490008
GO:0051092	positive regulation of NF-kappaB transcription factor activity	BP				0.0499095
GO:0045549	9-cis-epoxycarotenoid dioxygenase activity	MF					0.00449334
GO:0065007	biological regulation	BP					0.00525219
GO:0015714	phosphoenolpyruvate transport	BP					0.0119814	0.0390793
GO:0043280	positive regulation of cysteine-type endopeptidase activity involved in apoptotic process	BP					0.0119814
GO:0000408	EKC/KEOPS complex	CC					0.0168286
GO:0080147	root hair cell development	BP					0.0170935
GO:0002949	tRNA threonylcarbamoyladenosine modification	BP					0.0179911
GO:0003735	structural constituent of ribosome	MF					0.0259338
GO:0009234	menaquinone biosynthetic process	BP					0.0261665
GO:0045158	electron transporter, transferring electrons within cytochrome b6/f complex of photosystem II activity	MF	0.0192467				0.0261665
GO:0018401	peptidyl-proline hydroxylation to 4-hydroxy-L-proline	BP					0.0310584	0.00687471
GO:0048496	maintenance of animal organ identity	BP					0.0319042
GO:1900039	positive regulation of cellular response to hypoxia	BP					0.0321006
GO:0046870	cadmium ion binding	MF					0.0323891
GO:0031595	nuclear proteasome complex	CC					0.0325645
GO:0009719	response to endogenous stimulus	BP					0.0325645
GO:0005244	voltage-gated ion channel activity	MF					0.0325853
GO:0090451	cotyledon boundary formation	BP					0.0327008	0.0442099
GO:0009011	starch synthase activity	MF					0.032743
GO:0004373	glycogen (starch) synthase activity	MF					0.0367239
GO:0004781	sulfate adenylyltransferase (ATP) activity	MF					0.0375298
GO:0015276	ligand-gated ion channel activity	MF					0.0375946
GO:0010264	myo-inositol hexakisphosphate biosynthetic process	BP					0.0375946
GO:0006152	purine nucleoside catabolic process	BP					0.0375946	0.0163808
GO:0047800	cysteamine dioxygenase activity	MF					0.0375946	0.0448207
GO:0006023	aminoglycan biosynthetic process	BP					0.0375946
GO:0044249	cellular biosynthetic process	BP					0.0398954
GO:0000103	sulfate assimilation	BP					0.0398954
GO:0004792	thiosulfate sulfurtransferase activity	MF					0.0398954
GO:0034045	phagophore assembly site membrane	CC					0.0398954
GO:0071917	triose-phosphate transmembrane transporter activity	MF					0.0398954
GO:0009116	nucleoside metabolic process	BP					0.0398954
GO:0045454	cell redox homeostasis	BP					0.0398954
GO:0009772	photosynthetic electron transport in photosystem II	BP	0.0118832				0.0399186
GO:0033840	NDP-glucose-starch glucosyltransferase activity	MF					0.0399186
GO:0016773	phosphotransferase activity, alcohol group as acceptor	MF					0.0404884
GO:0019898	extrinsic component of membrane	CC					0.0408559
GO:0031597	cytosolic proteasome complex	CC					0.0421472
GO:0015066	alpha-amylase inhibitor activity	MF					0.0423997
GO:0008064	regulation of actin polymerization or depolymerization	BP					0.0423997
GO:0006662	glycerol ether metabolic process	BP					0.0423997
GO:0004620	phospholipase activity	MF					0.0423997
GO:0034337	RNA folding	BP					0.0423997
GO:0006106	fumarate metabolic process	BP					0.0423997	0.0298107
GO:0017040	N-acylsphingosine amidohydrolase activity	MF					0.0423997
GO:0008444	CDP-diacylglycerol-glycerol-3-phosphate 3-phosphatidyltransferase activity	MF					0.0423997
GO:0034067	protein localization to Golgi apparatus	BP					0.0423997
GO:1902479	positive regulation of defense response to bacterium, incompatible interaction	BP					0.0423997
GO:0000930	gamma-tubulin complex	CC					0.0423997	0.0221333
GO:1901002	positive regulation of response to salt stress	BP					0.0423997
GO:0009712	catechol-containing compound metabolic process	BP					0.0423997
GO:0080090	regulation of primary metabolic process	BP					0.0423997
GO:0080163	regulation of protein serine/threonine phosphatase activity	BP	0.0372145				0.0423997
GO:0047216	inositol 3-alpha-galactosyltransferase activity	MF					0.0423997
GO:1990316	Atg1/ULK1 kinase complex	CC					0.0423997
GO:0042371	vitamin K biosynthetic process	BP					0.0423997
GO:0004022	alcohol dehydrogenase (NAD+) activity	MF					0.0423997
GO:0010319	stromule	CC					0.0423997
GO:0042937	tripeptide transmembrane transporter activity	MF					0.0423997
GO:0042938	dipeptide transport	BP					0.0423997
GO:0042939	tripeptide transport	BP					0.0423997
GO:0005840	ribosome	CC					0.0423997
GO:0002164	larval development	BP					0.0423997
GO:1901038	cyanidin 3-O-glucoside metabolic process	BP					0.0423997
GO:0047268	galactinol-raffinose galactosyltransferase activity	MF					0.0423997
GO:0047274	galactinol-sucrose galactosyltransferase activity	MF					0.0423997
GO:0003914	DNA (6-4) photolyase activity	MF					0.0423997	0.0176045
GO:0003834	beta-carotene 15,15'-monooxygenase activity	MF					0.0423997
GO:0042617	paclitaxel biosynthetic process	BP					0.0423997
GO:0033948	fructan beta-(2,1)-fructosidase activity	MF					0.0423997
GO:0004602	glutathione peroxidase activity	MF					0.0423997
GO:0033949	fructan beta-(2,6)-fructosidase activity	MF					0.0423997
GO:0051649	establishment of localization in cell	BP					0.0423997
GO:0044806	G-quadruplex DNA unwinding	BP					0.0423997
GO:0052834	inositol monophosphate phosphatase activity	MF					0.0423997
GO:0009568	amyloplast starch grain	CC					0.0423997
GO:0010280	UDP-L-rhamnose synthase activity	MF					0.0423997
GO:0050377	UDP-glucose 4,6-dehydratase activity	MF					0.0423997
GO:0080002	UDP-glucose:4-aminobenzoate acylglucosyltransferase activity	MF	0.00108147				0.0428315
GO:0000977	RNA polymerase II transcription regulatory region sequence-specific DNA binding	MF					0.0432916
GO:0016407	acetyltransferase activity	MF					0.0432916
GO:0009408	response to heat	BP					0.0432916
GO:0008047	enzyme activator activity	MF					0.0444207
GO:0006323	DNA packaging	BP					0.0444207
GO:0004185	serine-type carboxypeptidase activity	MF					0.0444207	3.83612e-05
GO:0044036	cell wall macromolecule metabolic process	BP					0.0459183	7.25603e-10
GO:0016688	L-ascorbate peroxidase activity	MF					0.0459183
GO:2001070	starch binding	MF					0.0459183
GO:0055088	lipid homeostasis	BP					0.0459183
GO:0061024	membrane organization	BP					0.0469147
GO:0008540	proteasome regulatory particle, base subcomplex	CC					0.0470227
GO:0005542	folic acid binding	MF					0.0472626
GO:0004860	protein kinase inhibitor activity	MF	0.000602508				0.0472626
GO:0008479	queuine tRNA-ribosyltransferase activity	MF					0.0472626
GO:0051211	anisotropic cell growth	BP					0.0472626
GO:0009123	nucleoside monophosphate metabolic process	BP					0.0472626
GO:0009827	plant-type cell wall modification	BP					0.0472626
GO:0007143	female meiotic nuclear division	BP					0.0475803
GO:0048497	maintenance of floral organ identity	BP					0.0475803
GO:0003909	DNA ligase activity	MF					0.0475803
GO:0009813	flavonoid biosynthetic process	BP					0.0481327
GO:0010375	stomatal complex patterning	BP					0.0481327	0.0198605
GO:0071492	cellular response to UV-A	BP					0.0487093
GO:0004641	phosphoribosylformylglycinamidine cyclo-ligase activity	MF					0.0490099
GO:0042330	taxis	BP					0.0490099
GO:0032940	secretion by cell	BP					0.0490099	0.0235252
GO:0007266	Rho protein signal transduction	BP					0.0490099
GO:0050660	flavin adenine dinucleotide binding	MF	0.0171393				0.0490099
GO:0009688	abscisic acid biosynthetic process	BP					0.0494
GO:0010143	cutin biosynthetic process	BP					0.0494	0.000329102
GO:0019104	DNA N-glycosylase activity	MF					0.0494677
GO:0010089	xylem development	BP						6.11694e-11
GO:0009944	polarity specification of adaxial/abaxial axis	BP						2.76071e-08
GO:0010329	auxin efflux transmembrane transporter activity	MF						1.27403e-06
GO:0010103	stomatal complex morphogenesis	BP						4.74422e-06
GO:0048439	flower morphogenesis	BP						1.09561e-05
GO:0008544	epidermis development	BP						2.63993e-05
GO:0048645	animal organ formation	BP						4.74066e-05
GO:0010088	phloem development	BP						6.11036e-05
GO:0010025	wax biosynthetic process	BP						6.71455e-05
GO:0009647	skotomorphogenesis	BP						7.82373e-05
GO:0045962	positive regulation of development, heterochronic	BP						8.83512e-05
GO:0009855	determination of bilateral symmetry	BP						9.418e-05
GO:0009736	cytokinin-activated signaling pathway	BP						0.000101584
GO:0009969	xyloglucan biosynthetic process	BP						0.000104811
GO:0010014	meristem initiation	BP						0.000116065
GO:0010015	root morphogenesis	BP						0.000159417
GO:0010315	auxin efflux	BP						0.000163305
GO:0010338	leaf formation	BP						0.000250083
GO:0005774	vacuolar membrane	CC						0.000268331
GO:0016760	cellulose synthase (UDP-forming) activity	MF						0.000302156
GO:0048443	stamen development	BP						0.000333811
GO:0007020	microtubule nucleation	BP						0.000341602
GO:0051322	anaphase	BP						0.000342864
GO:0030243	cellulose metabolic process	BP						0.000391382
GO:0009958	positive gravitropism	BP						0.000392174
GO:0004714	transmembrane receptor protein tyrosine kinase activity	MF						0.000443453
GO:0042555	MCM complex	CC						0.000522714
GO:0048359	mucilage metabolic process involved in seed coat development	BP						0.000543974
GO:0060089	molecular transducer activity	MF						0.000554451
GO:0010540	basipetal auxin transport	BP						0.000669213
GO:0048829	root cap development	BP	0.0419547					0.000676635
GO:0033807	icosanoyl-CoA synthase activity	MF	0.0298722					0.00069412
GO:0010252	auxin homeostasis	BP						0.000738881
GO:0010588	cotyledon vascular tissue pattern formation	BP						0.00092
GO:0010166	wax metabolic process	BP						0.00104566
GO:0030173	integral component of Golgi membrane	CC						0.00106581
GO:0004338	glucan exo-1,3-beta-glucosidase activity	MF						0.00109382
GO:0009922	fatty acid elongase activity	MF						0.00122586
GO:0003680	AT DNA binding	MF						0.00122586
GO:0010358	leaf shaping	BP						0.0012597
GO:0004622	lysophospholipase activity	MF	0.0419547					0.00165137
GO:0022622	root system development	BP						0.00176521
GO:0051753	mannan synthase activity	MF						0.00182868
GO:0010067	procambium histogenesis	BP						0.00195331
GO:0015171	amino acid transmembrane transporter activity	MF						0.0019956
GO:0048229	gametophyte development	BP						0.00202789
GO:0009925	basal plasma membrane	CC						0.00235006
GO:2000603	regulation of secondary growth	BP						0.00236523
GO:0006099	tricarboxylic acid cycle	BP						0.00242139
GO:0010051	xylem and phloem pattern formation	BP						0.00252835
GO:0031418	L-ascorbic acid binding	MF						0.00268575
GO:0010359	regulation of anion channel activity	BP						0.00273273
GO:0010043	response to zinc ion	BP						0.00273273
GO:0010233	phloem transport	BP						0.00273273
GO:0000186	activation of MAPKK activity	BP						0.00295963
GO:0008324	cation transmembrane transporter activity	MF						0.00319154
GO:0046483	heterocycle metabolic process	BP						0.00320483
GO:0048563	post-embryonic animal organ morphogenesis	BP						0.00320483
GO:0052716	hydroquinone:oxygen oxidoreductase activity	MF	0.0020237					0.00321641
GO:0006268	DNA unwinding involved in DNA replication	BP						0.00368423
GO:0006351	transcription, DNA-templated	BP						0.0037282
GO:0000347	THO complex	CC						0.00399664
GO:0004801	sedoheptulose-7-phosphate:D-glyceraldehyde-3-phosphate glyceronetransferase activity	MF						0.00404525
GO:0033617	mitochondrial cytochrome c oxidase assembly	BP						0.00406787
GO:0006085	acetyl-CoA biosynthetic process	BP						0.00419224
GO:0015630	microtubule cytoskeleton	CC						0.0042194
GO:0009627	systemic acquired resistance	BP	0.00736514					0.00431726
GO:0004069	L-aspartate:2-oxoglutarate aminotransferase activity	MF						0.00432923
GO:0004709	MAP kinase kinase kinase activity	MF						0.00436724
GO:0047334	diphosphate-fructose-6-phosphate 1-phosphotransferase activity	MF						0.0046109
GO:1900376	regulation of secondary metabolite biosynthetic process	BP	0.0416041					0.0046109
GO:0006189	'de novo' IMP biosynthetic process	BP						0.00475015
GO:0046983	protein dimerization activity	MF						0.00487952
GO:0052544	defense response by callose deposition in cell wall	BP	0.0419547					0.00500744
GO:0006270	DNA replication initiation	BP						0.00504171
GO:0047499	calcium-independent phospholipase A2 activity	MF	0.0255082					0.00504171
GO:0048437	floral organ development	BP						0.00549338
GO:0046622	positive regulation of organ growth	BP						0.00583816
GO:0040009	regulation of growth rate	BP						0.00598437
GO:0050121	N-acylglucosamine 2-epimerase activity	MF						0.00627432
GO:0003878	ATP citrate synthase activity	MF						0.00657818
GO:0009986	cell surface	CC						0.00665576
GO:0009921	auxin efflux carrier complex	CC						0.00675154
GO:2000123	positive regulation of stomatal complex development	BP						0.00679415
GO:0015629	actin cytoskeleton	CC						0.00687471
GO:0019853	L-ascorbic acid biosynthetic process	BP						0.0069637
GO:0006348	chromatin silencing at telomere	BP						0.00709012
GO:0034227	tRNA thio-modification	BP						0.00720453
GO:0007626	locomotory behavior	BP						0.00729104
GO:0004088	carbamoyl-phosphate synthase (glutamine-hydrolyzing) activity	MF						0.00754325
GO:0010102	lateral root morphogenesis	BP						0.00760535
GO:0016874	ligase activity	MF						0.00760535
GO:0080018	anthocyanin 5-O-glucosyltransferase activity	MF	0.0419547					0.00827763
GO:0043565	sequence-specific DNA binding	MF	1.03201e-05					0.00837731
GO:0010229	inflorescence development	BP						0.00856863
GO:0031540	regulation of anthocyanin biosynthetic process	BP						0.00870749
GO:0010279	indole-3-acetic acid amido synthetase activity	MF						0.00916702
GO:0080001	mucilage extrusion from seed coat	BP						0.00929076
GO:0019953	sexual reproduction	BP						0.00968227
GO:0048438	floral whorl development	BP						0.0101551
GO:0042759	long-chain fatty acid biosynthetic process	BP						0.0101551
GO:0046741	transport of virus in host, tissue to tissue	BP						0.0101759
GO:0005768	endosome	CC						0.0103044
GO:0003006	developmental process involved in reproduction	BP						0.010427
GO:0010305	leaf vascular tissue pattern formation	BP						0.0105657
GO:0015671	oxygen transport	BP						0.0106069
GO:0004650	polygalacturonase activity	MF						0.0106441
GO:0047259	glucomannan 4-beta-mannosyltransferase activity	MF						0.010656
GO:0010099	regulation of photomorphogenesis	BP						0.0108405
GO:0010162	seed dormancy process	BP						0.0109154
GO:0006949	syncytium formation	BP						0.0109658
GO:0030162	regulation of proteolysis	BP						0.0111764
GO:0048317	seed morphogenesis	BP						0.011342
GO:0010480	microsporocyte differentiation	BP						0.0116753
GO:0008447	L-ascorbate oxidase activity	MF	0.0061307					0.0116753
GO:0033843	xyloglucan 6-xylosyltransferase activity	MF						0.0124781
GO:0016707	gibberellin 3-beta-dioxygenase activity	MF						0.012794
GO:0048441	petal development	BP						0.0138853
GO:0048759	xylem vessel member cell differentiation	BP						0.0139766
GO:0030060	L-malate dehydrogenase activity	MF						0.0139789
GO:0071944	cell periphery	CC						0.0143533
GO:0046356	acetyl-CoA catabolic process	BP						0.01439
GO:0010160	formation of animal organ boundary	BP						0.0146779
GO:0016761	cellulose synthase (GDP-forming) activity	MF						0.0152136
GO:0034060	cyanelle stroma	CC						0.0155458
GO:0045487	gibberellin catabolic process	BP						0.0155471
GO:0010311	lateral root formation	BP						0.0156174
GO:0043295	glutathione binding	MF						0.0156826
GO:0030317	flagellated sperm motility	BP						0.0160425
GO:0051603	proteolysis involved in cellular protein catabolic process	BP						0.0170441
GO:0048364	root development	BP						0.0174809
GO:0080054	low-affinity nitrate transmembrane transporter activity	MF						0.0176045
GO:0010434	bract formation	BP						0.0176055
GO:0009432	SOS response	BP						0.0176702
GO:0004128	cytochrome-b5 reductase activity, acting on NAD(P)H	MF						0.0177444
GO:0010328	auxin influx transmembrane transporter activity	MF						0.0178112
GO:0060919	auxin influx	BP						0.0178112
GO:0070825	micropyle	CC						0.0180921
GO:0034635	glutathione transport	BP						0.0181189
GO:0004844	uracil DNA N-glycosylase activity	MF						0.0182353
GO:0050378	UDP-glucuronate 4-epimerase activity	MF						0.018237
GO:0004126	cytidine deaminase activity	MF						0.0182592
GO:0009972	cytidine deamination	BP						0.0182592
GO:0005991	trehalose metabolic process	BP						0.0186463
GO:0006101	citrate metabolic process	BP						0.0187464
GO:0010168	ER body	CC						0.0187464
GO:0031520	plasma membrane of cell tip	CC						0.0187464
GO:0043812	phosphatidylinositol-4-phosphate phosphatase activity	MF						0.0187464
GO:0000799	nuclear condensin complex	CC						0.0187464
GO:0010400	rhamnogalacturonan I side chain metabolic process	BP						0.0187464
GO:0009727	detection of ethylene stimulus	BP	0.000279552					0.0191483
GO:0015089	high-affinity copper ion transmembrane transporter activity	MF						0.0198354
GO:0005794	Golgi apparatus	CC						0.0206183
GO:0043232	intracellular non-membrane-bounded organelle	CC						0.0210968
GO:0006536	glutamate metabolic process	BP						0.0213314
GO:0047215	indole-3-acetate beta-glucosyltransferase activity	MF	0.0196347					0.0216502
GO:0031539	positive regulation of anthocyanin metabolic process	BP						0.0223936
GO:0005381	iron ion transmembrane transporter activity	MF						0.023326
GO:0009877	nodulation	BP						0.0241535
GO:0006569	tryptophan catabolic process	BP						0.0242886
GO:0009610	response to symbiotic fungus	BP						0.0244854
GO:0009897	external side of plasma membrane	CC						0.0249153
GO:0006188	IMP biosynthetic process	BP						0.0251968
GO:0048826	cotyledon morphogenesis	BP						0.0251968
GO:0031205	endoplasmic reticulum Sec complex	CC						0.0253154
GO:1900037	regulation of cellular response to hypoxia	BP	0.0255082					0.0254078
GO:0009960	endosperm development	BP						0.0254078
GO:0004124	cysteine synthase activity	MF						0.0257143
GO:0010248	establishment or maintenance of transmembrane electrochemical gradient	BP						0.0258516
GO:0090266	regulation of mitotic cell cycle spindle assembly checkpoint	BP						0.0263394
GO:0007166	cell surface receptor signaling pathway	BP						0.0266563
GO:0004656	procollagen-proline 4-dioxygenase activity	MF						0.0272062
GO:0045157	electron transporter, transferring electrons within the noncyclic electron transport pathway of photosynthesis activity	MF						0.0272062
GO:0042761	very long-chain fatty acid biosynthetic process	BP						0.0272062
GO:0051513	regulation of monopolar cell growth	BP						0.0280706
GO:0004416	hydroxyacylglutathione hydrolase activity	MF						0.0283777
GO:0008892	guanine deaminase activity	MF						0.0296228
GO:0048366	leaf development	BP						0.0296307
GO:0042440	pigment metabolic process	BP						0.0296307
GO:0003979	UDP-glucose 6-dehydrogenase activity	MF						0.0301488
GO:0004177	aminopeptidase activity	MF						0.0301557
GO:0071669	plant-type cell wall organization or biogenesis	BP						0.0307061
GO:0031957	very long-chain fatty acid-CoA ligase activity	MF						0.0307061
GO:0048765	root hair cell differentiation	BP						0.0307799
GO:0005764	lysosome	CC						0.0310255
GO:0019481	L-alanine catabolic process, by transamination	BP						0.0311574
GO:0008967	phosphoglycolate phosphatase activity	MF						0.031338
GO:0009166	nucleotide catabolic process	BP						0.0314268
GO:0009956	radial pattern formation	BP						0.0319945
GO:0004034	aldose 1-epimerase activity	MF						0.0321728
GO:0009308	amine metabolic process	BP						0.0321728
GO:0006732	coenzyme metabolic process	BP						0.0321728
GO:0004382	guanosine-diphosphatase activity	MF						0.0327714
GO:0045134	uridine-diphosphatase activity	MF						0.0327714
GO:0052793	pectin acetylesterase activity	MF						0.0329838
GO:0042353	fucose biosynthetic process	BP						0.0331861
GO:0010192	mucilage biosynthetic process	BP						0.0333582
GO:0005658	alpha DNA polymerase:primase complex	CC						0.033426
GO:0031062	positive regulation of histone methylation	BP						0.0338062
GO:0045927	positive regulation of growth	BP						0.0338197
GO:0010432	bract development	BP						0.0338197
GO:0016818	hydrolase activity, acting on acid anhydrides, in phosphorus-containing anhydrides	MF						0.0338197
GO:0045254	pyruvate dehydrogenase complex	CC						0.0338197
GO:0004775	succinate-CoA ligase (ADP-forming) activity	MF						0.0338197
GO:0019321	pentose metabolic process	BP						0.0339809
GO:0004623	phospholipase A2 activity	MF						0.0341376
GO:0022900	electron transport chain	BP						0.0344233
GO:2000122	negative regulation of stomatal complex development	BP						0.0344233
GO:0033115	cyanelle thylakoid membrane	CC						0.0348432
GO:0018106	peptidyl-histidine phosphorylation	BP						0.0349913
GO:0046621	negative regulation of organ growth	BP						0.035897
GO:0031177	phosphopantetheine binding	MF						0.03603
GO:0045330	aspartyl esterase activity	MF						0.036443
GO:0009299	mRNA transcription	BP						0.0365268
GO:0015809	arginine transport	BP						0.0365268
GO:1900457	regulation of brassinosteroid mediated signaling pathway	BP						0.036596
GO:0010485	H4 histone acetyltransferase activity	MF						0.0378297
GO:0005945	6-phosphofructokinase complex	CC						0.0378297
GO:0000719	photoreactive repair	BP						0.0380626
GO:0010158	abaxial cell fate specification	BP						0.0380626
GO:0010037	response to carbon dioxide	BP	0.0134721					0.0380643
GO:0000139	Golgi membrane	CC						0.0381636
GO:0034976	response to endoplasmic reticulum stress	BP						0.0381636
GO:0003868	4-hydroxyphenylpyruvate dioxygenase activity	MF						0.0384115
GO:0001736	establishment of planar polarity	BP						0.038906
GO:0016746	transferase activity, transferring acyl groups	MF						0.0390796
GO:0006417	regulation of translation	BP						0.0392021
GO:0050278	sedoheptulose-bisphosphatase activity	MF						0.0397469
GO:0046855	inositol phosphate dephosphorylation	BP						0.0399623
GO:0006002	fructose 6-phosphate metabolic process	BP						0.0402329
GO:0045176	apical protein localization	BP						0.0404139
GO:0042547	cell wall modification involved in multidimensional cell growth	BP						0.0404139
GO:1904823	purine nucleobase transmembrane transport	BP						0.0407181
GO:0080132	fatty acid alpha-hydroxylase activity	MF						0.0407441
GO:0046520	sphingoid biosynthetic process	BP	0.014979					0.0412199
GO:0050269	coniferyl-aldehyde dehydrogenase activity	MF						0.041798
GO:0033881	bile-acid-CoA hydrolase activity	MF	0.0134721					0.0424693
GO:0050306	sucrose 1F-fructosyltransferase activity	MF	0.0134721					0.0424693
GO:0033612	receptor serine/threonine kinase binding	MF						0.0424693
GO:0000014	single-stranded DNA endodeoxyribonuclease activity	MF						0.042698
GO:0004503	monophenol monooxygenase activity	MF						0.0428255
GO:0008798	beta-aspartyl-peptidase activity	MF						0.0428415
GO:0033345	asparagine catabolic process via L-aspartate	BP						0.0428415
GO:0080151	positive regulation of salicylic acid mediated signaling pathway	BP						0.0429472
GO:0009703	nitrate reductase (NADH) activity	MF	0.0140448					0.0429826
GO:0010366	negative regulation of ethylene biosynthetic process	BP						0.0429826
GO:0035999	tetrahydrofolate interconversion	BP						0.0429826
GO:0051787	misfolded protein binding	MF						0.0429826
GO:0031357	integral component of chloroplast inner membrane	CC						0.0429826
GO:0008281	sulfonylurea receptor activity	MF						0.0429826
GO:0009311	oligosaccharide metabolic process	BP						0.0429826
GO:0009852	auxin catabolic process	BP						0.0429826
GO:0009828	plant-type cell wall loosening	BP						0.0429938
GO:0043626	PCNA complex	CC						0.0430335
GO:0009263	deoxyribonucleotide biosynthetic process	BP						0.0431335
GO:0000035	acyl binding	MF						0.0431335
GO:0019244	lactate biosynthetic process from pyruvate	BP						0.0431821
GO:1901348	positive regulation of secondary cell wall biogenesis	BP						0.0435544
GO:0046835	carbohydrate phosphorylation	BP						0.0439863
GO:0016556	mRNA modification	BP						0.0440363
GO:0055082	cellular chemical homeostasis	BP						0.0442099
GO:0008782	adenosylhomocysteine nucleosidase activity	MF						0.0442099
GO:0008930	methylthioadenosine nucleosidase activity	MF						0.0442099
GO:0048504	regulation of timing of animal organ formation	BP						0.0444986
GO:0048032	galacturonate binding	MF						0.0447615
GO:0031351	integral component of plastid membrane	CC						0.0447615
GO:0016717	oxidoreductase activity, acting on paired donors, with oxidation of a pair of donors resulting in the reduction of molecular oxygen to two molecules of water	MF	0.0196347					0.0449008
GO:0030089	phycobilisome	CC						0.0449922
GO:0043087	regulation of GTPase activity	BP						0.0451417
GO:0034628	'de novo' NAD biosynthetic process from aspartate	BP						0.0459553
GO:0010254	nectary development	BP						0.0467871
GO:0008107	galactoside 2-alpha-L-fucosyltransferase activity	MF	0.0269787					0.0474595
GO:0005788	endoplasmic reticulum lumen	CC						0.0474595
GO:0033771	licodione synthase activity	MF						0.0474595
GO:0002229	defense response to oomycetes	BP	0.0402521					0.0476388
GO:0010256	endomembrane system organization	BP						0.0478934
GO:0071398	cellular response to fatty acid	BP						0.0478934
GO:0070483	detection of hypoxia	BP						0.0478934
GO:0090709	regulation of timing of plant organ formation	BP						0.0482718
GO:0009851	auxin biosynthetic process	BP						0.0482762
GO:0040017	positive regulation of locomotion	BP						0.0483827
GO:0010012	steroid 22-alpha hydroxylase activity	MF						0.0489886
GO:2000112	regulation of cellular macromolecule biosynthetic process	BP						0.0491753
GO:0032580	Golgi cisterna membrane	CC						0.0491965
GO:0072348	sulfur compound transport	BP						0.0491965
GO:0034551	mitochondrial respiratory chain complex III assembly	BP						0.0492831
GO:0051938	L-glutamate import	BP						0.0493214
GO:0006835	dicarboxylic acid transport	BP						0.0493602
GO:0052662	zeaxanthin epoxidase activity	MF						0.0493844
GO:0052663	antheraxanthin epoxidase activity	MF						0.0493844
GO:0032886	regulation of microtubule-based process	BP						0.0494061
GO:1902475	L-alpha-amino acid transmembrane transport	BP						0.0495378
GO:0047918	GDP-mannose 3,5-epimerase activity	MF						0.0497139
GO:0006984	ER-nucleus signaling pathway	BP	1.03635e-08
GO:1903507	negative regulation of nucleic acid-templated transcription	BP	1.19737e-08
GO:2000022	regulation of jasmonic acid mediated signaling pathway	BP	9.00798e-08
GO:0003714	transcription corepressor activity	MF	1.95045e-07
GO:0004058	aromatic-L-amino-acid decarboxylase activity	MF	1.822e-05
GO:0004837	tyrosine decarboxylase activity	MF	1.822e-05
GO:0045156	electron transporter, transferring electrons within the cyclic electron transport pathway of photosynthesis activity	MF	4.07906e-05
GO:0052542	defense response by callose deposition	BP	5.74853e-05
GO:0010337	regulation of salicylic acid metabolic process	BP	9.71828e-05
GO:0061025	membrane fusion	BP	0.000388617
GO:0006091	generation of precursor metabolites and energy	BP	0.000471543
GO:0004575	sucrose alpha-glucosidase activity	MF	0.000575359
GO:0050589	leucocyanidin oxygenase activity	MF	0.000615227
GO:0006354	DNA-templated transcription, elongation	BP	0.000638826
GO:0004558	alpha-1,4-glucosidase activity	MF	0.00124678
GO:0042284	sphingolipid delta-4 desaturase activity	MF	0.00136318
GO:0015698	inorganic anion transport	BP	0.00147602
GO:0019752	carboxylic acid metabolic process	BP	0.00191345
GO:0048235	pollen sperm cell differentiation	BP	0.0028068
GO:0000287	magnesium ion binding	MF	0.00287063
GO:0000428	DNA-directed RNA polymerase complex	CC	0.00339017
GO:0009899	ent-kaurene synthase activity	MF	0.0037422
GO:0010112	regulation of systemic acquired resistance	BP	0.00416299
GO:0015672	monovalent inorganic cation transport	BP	0.00500212
GO:0000254	C-4 methylsterol oxidase activity	MF	0.00506744
GO:0015695	organic cation transport	BP	0.00506744
GO:0015101	organic cation transmembrane transporter activity	MF	0.00517761
GO:0005524	ATP binding	MF	0.00764586
GO:0008631	intrinsic apoptotic signaling pathway in response to oxidative stress	BP	0.00801382
GO:0016166	phytoene dehydrogenase activity	MF	0.00801382
GO:0050463	nitrate reductase [NAD(P)H] activity	MF	0.00801382
GO:0000151	ubiquitin ligase complex	CC	0.00913355
GO:0016720	delta12-fatty acid dehydrogenase activity	MF	0.00932949
GO:0046688	response to copper ion	BP	0.00932949
GO:0015802	basic amino acid transport	BP	0.0106734
GO:0052638	indole-3-butyrate beta-glucosyltransferase activity	MF	0.0118832
GO:0006006	glucose metabolic process	BP	0.0134721
GO:0002215	defense response to nematode	BP	0.0134721
GO:0008127	quercetin 2,3-dioxygenase activity	MF	0.0134721
GO:0010179	IAA-Ala conjugate hydrolase activity	MF	0.0134721
GO:0016710	trans-cinnamate 4-monooxygenase activity	MF	0.0134721
GO:0030224	monocyte differentiation	BP	0.0134721
GO:0040008	regulation of growth	BP	0.0140448
GO:0005249	voltage-gated potassium channel activity	MF	0.0140448
GO:0008514	organic anion transmembrane transporter activity	MF	0.0140448
GO:0032585	multivesicular body membrane	CC	0.0140448
GO:0071475	cellular hyperosmotic salinity response	BP	0.0140448
GO:0004089	carbonate dehydratase activity	MF	0.0147112
GO:0016706	2-oxoglutarate-dependent dioxygenase activity	MF	0.014979
GO:0009938	negative regulation of gibberellic acid mediated signaling pathway	BP	0.0167913
GO:0008509	anion transmembrane transporter activity	MF	0.0170155
GO:0080148	negative regulation of response to water deprivation	BP	0.0170155
GO:0006749	glutathione metabolic process	BP	0.0178248
GO:0043161	proteasome-mediated ubiquitin-dependent protein catabolic process	BP	0.0181866
GO:0047714	galactolipase activity	MF	0.0189563
GO:0019897	extrinsic component of plasma membrane	CC	0.0192467
GO:0034440	lipid oxidation	BP	0.0192467
GO:0015749	monosaccharide transmembrane transport	BP	0.0196347
GO:0009970	cellular response to sulfate starvation	BP	0.0204194
GO:0051339	regulation of lyase activity	BP	0.0232249
GO:0005987	sucrose catabolic process	BP	0.0232585
GO:0003885	D-arabinono-1,4-lactone oxidase activity	MF	0.0255082
GO:0004563	beta-N-acetylhexosaminidase activity	MF	0.0255082
GO:0004638	phosphoribosylaminoimidazole carboxylase activity	MF	0.0255082
GO:0017059	serine C-palmitoyltransferase complex	CC	0.0255082
GO:0051669	fructan beta-fructosidase activity	MF	0.0255082
GO:0071203	WASH complex	CC	0.0255082
GO:0046777	protein autophosphorylation	BP	0.0260021
GO:0008395	steroid hydroxylase activity	MF	0.0260021
GO:0055069	zinc ion homeostasis	BP	0.0260021
GO:0072488	ammonium transmembrane transport	BP	0.0260021
GO:0090447	glycerol-3-phosphate 2-O-acyltransferase activity	MF	0.0260021
GO:0046482	para-aminobenzoic acid metabolic process	BP	0.0269787
GO:0008308	voltage-gated anion channel activity	MF	0.0269787
GO:0031090	organelle membrane	CC	0.0298722
GO:0006983	ER overload response	BP	0.0322955
GO:0009715	chalcone biosynthetic process	BP	0.0322955
GO:0032993	protein-DNA complex	CC	0.0322955
GO:0045263	proton-transporting ATP synthase complex, coupling factor F(o)	CC	0.0322955
GO:1900117	regulation of execution phase of apoptosis	BP	0.0322955
GO:0080024	indolebutyric acid metabolic process	BP	0.0332542
GO:0006887	exocytosis	BP	0.0345137
GO:0042777	plasma membrane ATP synthesis coupled proton transport	BP	0.0372145
GO:0045332	phospholipid translocation	BP	0.0372145
GO:0071216	cellular response to biotic stimulus	BP	0.0372145
GO:0071456	cellular response to hypoxia	BP	0.0372145
GO:0000302	response to reactive oxygen species	BP	0.0375427
GO:0030139	endocytic vesicle	CC	0.0375427
GO:0035556	intracellular signal transduction	BP	0.0384462
GO:0004607	phosphatidylcholine-sterol O-acyltransferase activity	MF	0.0384462
GO:0009528	plastid inner membrane	CC	0.0384462
GO:0009823	cytokinin catabolic process	BP	0.0384462
GO:0030312	external encapsulating structure	CC	0.0384462
GO:0033499	galactose catabolic process via UDP-galactose	BP	0.0384462
GO:0048446	petal morphogenesis	BP	0.0384462
GO:0080086	stamen filament development	BP	0.0384462
GO:0003841	1-acylglycerol-3-phosphate O-acyltransferase activity	MF	0.0402521
GO:0016929	SUMO-specific protease activity	MF	0.0402521
GO:0043169	cation binding	MF	0.0402521
GO:0046933	proton-transporting ATP synthase activity, rotational mechanism	MF	0.0402521
GO:0036065	fucosylation	BP	0.0402521
GO:0000249	C-22 sterol desaturase activity	MF	0.0402521
GO:0003976	UDP-N-acetylglucosamine-lysosomal-enzyme N-acetylglucosaminephosphotransferase activity	MF	0.0402521
GO:0004767	sphingomyelin phosphodiesterase activity	MF	0.0402521
GO:0008752	FMN reductase activity	MF	0.0402521
GO:0010055	atrichoblast differentiation	BP	0.0402521
GO:0010654	apical cell fate commitment	BP	0.0402521
GO:0016759	cellulose synthase activity	MF	0.0402521
GO:0016782	transferase activity, transferring sulfur-containing groups	MF	0.0402521
GO:0017153	sodium:dicarboxylate symporter activity	MF	0.0402521
GO:0019236	response to pheromone	BP	0.0402521
GO:0019500	cyanide catabolic process	BP	0.0402521
GO:0031407	oxylipin metabolic process	BP	0.0402521
GO:0042343	indole glucosinolate metabolic process	BP	0.0402521
GO:0043813	phosphatidylinositol-3,5-bisphosphate 5-phosphatase activity	MF	0.0402521
GO:0050017	L-3-cyanoalanine synthase activity	MF	0.0402521
GO:0050630	(iso)eugenol O-methyltransferase activity	MF	0.0402521
GO:0052386	cell wall thickening	BP	0.0402521
GO:0052576	carbohydrate storage	BP	0.0402521
GO:0052615	ent-kaurene oxidase activity	MF	0.0402521
GO:0052694	jasmonoyl-isoleucine-12-hydroxylase activity	MF	0.0402521
GO:0080021	response to benzoic acid	BP	0.0402521
GO:0080150	S-adenosyl-L-methionine:benzoic acid carboxyl methyl transferase activity	MF	0.0402521
GO:0080169	cellular response to boron-containing substance deprivation	BP	0.0402521
GO:0090153	regulation of sphingolipid biosynthetic process	BP	0.0402521
GO:0090693	plant organ senescence	BP	0.0402521
GO:1904222	positive regulation of serine C-palmitoyltransferase activity	BP	0.0402521
GO:1905034	regulation of antifungal innate immune response	BP	0.0402521
GO:0004366	glycerol-3-phosphate O-acyltransferase activity	MF	0.0416041
GO:0015145	monosaccharide transmembrane transporter activity	MF	0.0416041
GO:0048863	stem cell differentiation	BP	0.0416041
GO:0002768	immune response-regulating cell surface receptor signaling pathway	BP	0.0419547
GO:0009629	response to gravity	BP	0.0419547
GO:0009674	potassium:sodium symporter activity	MF	0.0419547
GO:0043546	molybdopterin cofactor binding	MF	0.0419547
GO:0044242	cellular lipid catabolic process	BP	0.0419547
GO:0048871	multicellular organismal homeostasis	BP	0.0419547
GO:0034613	cellular protein localization	BP	0.0477743
GO:0004129	cytochrome-c oxidase activity	MF	0.0478711
GO:0004471	malate dehydrogenase (decarboxylating) (NAD+) activity	MF	0.0478711
GO:0015020	glucuronosyltransferase activity	MF	0.0478711
GO:0048354	mucilage biosynthetic process involved in seed coat development	BP	0.0478711
GO:0000312	plastid small ribosomal subunit	CC	0.0478711
GO:0004016	adenylate cyclase activity	MF	0.0478711
GO:0005496	steroid binding	MF	0.0478711
GO:0006090	pyruvate metabolic process	BP	0.0478711
GO:0016207	4-coumarate-CoA ligase activity	MF	0.0478711
GO:0016984	ribulose-bisphosphate carboxylase activity	MF	0.0478711
GO:0080027	response to herbivore	BP	0.0478711
GO:0016881	acid-amino acid ligase activity	MF	0.0489803

## Sheet: pairwise GO upregulated
Supplemental table 4. Enrichment results of differentially expressed genes showing adjusted p-values.
category	term	ontology	M_8_I_vs_M_8_U	M_3_I_vs_M_3_U	M_7_I_vs_M_7_U	T_8_I_vs_T_8_U	T_3_I_vs_T_3_U	T_7_I_vs_T_7_U	V_8_I_vs_V_8_U	V_3_I_vs_V_3_U	V_7_I_vs_V_7_U
GO:0050832	defense response to fungus	BP	0.0311345	1.17467e-21	3.06091e-21	0.0049288	9.5513e-17	1.72353e-20		2.03151e-10	1.21168e-21
GO:0009963	positive regulation of flavonoid biosynthetic process	BP		1.83499e-09	4.04841e-09		8.20084e-08	2.06896e-12		1.19244e-07	6.00662e-07
GO:0009595	detection of biotic stimulus	BP		1.76805e-05	1.91509e-07	0.0232304	4.00933e-05	0.00118609		0.0164175	3.72748e-08
GO:0002831	regulation of response to biotic stimulus	BP		0.000386521	1.18598e-05	0.0152806	0.00131268	0.0113731			0.000162474
GO:0033759	flavone synthase activity	MF		0.00227167	0.0011396		0.0189658	0.0339009			0.000541618
GO:0051555	flavonol biosynthetic process	BP		0.0123293	0.000422946	0.029613		0.00419547
GO:0051553	flavone biosynthetic process	BP		0.0249478	0.00632611						0.0052422
GO:0009610	response to symbiotic fungus	BP			0.000389293			0.0176309
GO:0009611	response to wounding	BP		1.64514e-54	6.55595e-49	0.00201662	4.01578e-37	4.39403e-32		1.19816e-36	3.63373e-51
GO:0010200	response to chitin	BP		2.21251e-48	2.86967e-59	2.59999e-10	2.41419e-44	3.33425e-62		3.97565e-26	3.10554e-54
GO:0009743	response to carbohydrate	BP		4.50831e-41	4.21421e-52	1.41838e-08	4.37623e-36	2.3436e-55	0.0263181	3.17924e-24	1.75424e-46
GO:0002679	respiratory burst involved in defense response	BP		7.52555e-35	3.89985e-37	0.00409427	8.13475e-32	6.47251e-38		1.0306e-22	1.33355e-36
GO:0051704	multi-organism process	BP	0.00289415	1.75207e-23	2.43742e-25	7.91427e-05	1.65255e-12	7.29661e-15		2.51558e-13	3.33918e-24
GO:0009414	response to water deprivation	BP		2.93842e-21	9.27675e-21		4.04475e-14	5.80532e-24		2.09108e-17	3.54395e-18
GO:0009695	jasmonic acid biosynthetic process	BP		9.90253e-21	1.37926e-17	0.0401409	4.98393e-13	2.01826e-12		2.23427e-13	2.59069e-16
GO:0009738	abscisic acid-activated signaling pathway	BP		6.99862e-20	1.46511e-24	0.000662724	1.92339e-16	1.31174e-28		3.0892e-16	2.36781e-23
GO:0009620	response to fungus	BP		1.8288e-19	1.48917e-17	0.000476137	2.18845e-12	7.16166e-17		2.65656e-13	2.01064e-18
GO:0009867	jasmonic acid mediated signaling pathway	BP		2.4258e-19	7.02422e-20	0.000400954	7.86511e-12	3.31691e-18		8.38403e-14	1.90172e-16
GO:0009612	response to mechanical stimulus	BP		1.49308e-16	5.01979e-13		2.16793e-21	2.68072e-17		1.16063e-12	2.5698e-18
GO:0010363	regulation of plant-type hypersensitive response	BP		1.85108e-16	2.26516e-22	8.81064e-06	3.4097e-16	1.04015e-23		9.32969e-11	9.20213e-19
GO:0009873	ethylene-activated signaling pathway	BP		5.92032e-16	8.51009e-19	0.0180707	3.10876e-15	1.13598e-22	0.0354231	1.11498e-12	1.46044e-14
GO:0009733	response to auxin	BP		9.83085e-16	1.12392e-12	0.0392405	2.32622e-12	1.12863e-16		1.4497e-11	9.53075e-14
GO:0043069	negative regulation of programmed cell death	BP		1.06554e-15	1.19867e-17	0.000698449	9.81743e-13	8.52536e-17		2.39821e-09	6.58887e-14
GO:0006612	protein targeting to membrane	BP		1.45836e-15	1.64662e-22	7.5325e-06	3.52848e-15	1.30259e-23		2.37012e-10	3.9276e-19
GO:0009723	response to ethylene	BP		2.91807e-15	1.51754e-16	0.0020052	1.8103e-08	3.54137e-12		6.26573e-10	3.1885e-13
GO:0042538	hyperosmotic salinity response	BP		1.27712e-14	2.48882e-17	0.00492859	2.51557e-10	1.00971e-22	0.0338226	3.14948e-09	4.34103e-12
GO:0009693	ethylene biosynthetic process	BP		1.88207e-14	1.45516e-18		7.86058e-13	1.42237e-15		6.76862e-13	1.92207e-21
GO:0005886	plasma membrane	CC		6.49457e-14	1.71434e-26	0.00321104	5.9439e-08	1.69192e-15		6.08798e-06	5.69706e-26
GO:1903507	negative regulation of nucleic acid-templated transcription	BP		4.56586e-13	5.08309e-08		5.8512e-08	3.34912e-05		1.90953e-07	7.15076e-12
GO:0009753	response to jasmonic acid	BP		7.27827e-13	2.09165e-10		1.57686e-08	5.15654e-16	0.0464436	1.47016e-06	2.36186e-12
GO:0009862	systemic acquired resistance, salicylic acid mediated signaling pathway	BP		1.11659e-12	6.06962e-15	0.000179411	3.90952e-11	2.76831e-15		3.8409e-09	5.13085e-11
GO:0005506	iron ion binding	MF		1.43016e-12	4.10905e-09		4.34777e-10	5.61906e-08		2.0793e-08	3.32339e-08
GO:0042742	defense response to bacterium	BP	0.0352852	5.2104e-12	5.12045e-12	8.22812e-05	5.12677e-08	1.49075e-09		8.46399e-07	3.62217e-10
GO:0000165	MAPK cascade	BP		5.85553e-12	1.61696e-09		1.2581e-10	0.000413407		1.06538e-08	5.22959e-10
GO:0030968	endoplasmic reticulum unfolded protein response	BP		1.33284e-11	2.30438e-16		3.74911e-11	1.14266e-13		3.90184e-07	2.11329e-14
GO:2000022	regulation of jasmonic acid mediated signaling pathway	BP		2.19447e-11	1.00433e-05	0.0265711	6.44265e-07	0.000196986		1.57753e-06	3.68687e-09
GO:0009409	response to cold	BP		3.42089e-11	6.80691e-16	0.0259944	1.02386e-11	1.05188e-19		9.12817e-08	1.10582e-10
GO:0031348	negative regulation of defense response	BP		4.09297e-11	4.32022e-13	0.0241782	1.92282e-10	4.50082e-12		6.4238e-07	1.43026e-13
GO:0009651	response to salt stress	BP		5.32052e-11	7.48676e-13		3.72421e-07	9.48191e-15		4.27159e-07	9.72533e-11
GO:0080167	response to karrikin	BP	0.0215491	1.15895e-10	1.39613e-16		7.04349e-10	2.09603e-14		2.143e-16	6.16682e-08
GO:0052542	defense response by callose deposition	BP		1.23036e-10	2.66562e-07	1.11208e-05	2.36486e-11	6.04036e-07		1.39914e-07	7.79437e-11
GO:0006984	ER-nucleus signaling pathway	BP		1.82702e-10	1.69237e-12		8.0025e-10	3.35078e-11		2.91649e-05	8.21912e-12
GO:0003714	transcription corepressor activity	MF		6.96353e-10	1.25358e-05		5.03616e-06	0.000386717		9.8128e-06	1.37873e-09
GO:0009805	coumarin biosynthetic process	BP		1.08418e-09	1.42912e-09		4.46896e-05	0.000663796		1.38269e-07	1.25112e-06
GO:0006575	cellular modified amino acid metabolic process	BP		6.7758e-09	0.000136694		5.05032e-06	0.000639379		1.58266e-05	3.96604e-05
GO:0043900	regulation of multi-organism process	BP		1.11247e-08	5.07965e-09	0.00140795	1.44943e-06	0.000984561		0.000102374	7.24479e-08
GO:0010117	photoprotection	BP		1.36668e-08	2.99774e-07		2.41644e-09	3.95122e-08		1.37039e-06	1.00716e-08
GO:0006979	response to oxidative stress	BP		1.48137e-08	1.60519e-13		4.08052e-10	7.57187e-16		3.99708e-07	5.19809e-11
GO:0046244	salicylic acid catabolic process	BP		2.34375e-08	5.03191e-09		4.23809e-09	4.96382e-05		1.09528e-09	2.55581e-07
GO:0042398	cellular modified amino acid biosynthetic process	BP		2.35339e-08	2.39612e-06		1.42665e-05	2.26062e-05		9.12791e-05	0.000251392
GO:1900378	positive regulation of secondary metabolite biosynthetic process	BP		2.83499e-08	3.56521e-08		3.91523e-07	4.08636e-12		7.92814e-07	4.11221e-05
GO:2000762	regulation of phenylpropanoid metabolic process	BP		3.2957e-08	2.63639e-09		5.87697e-07	2.32144e-14		1.09472e-05	8.09191e-05
GO:0042180	cellular ketone metabolic process	BP		3.70016e-08	1.41506e-09		1.09324e-05			0.00019859	0.000760368
GO:0035264	multicellular organism growth	BP		6.12924e-08	1.58151e-06		1.11167e-08	3.35615e-07		3.87253e-06	4.556e-08
GO:0010310	regulation of hydrogen peroxide metabolic process	BP		6.13925e-08	3.45635e-11	0.00181928	6.73533e-08	2.93955e-07		1.45804e-06	7.33842e-10
GO:0006598	polyamine catabolic process	BP		1.03897e-07	3.45327e-06		7.02165e-09	3.47449e-08		1.35556e-06	5.14144e-06
GO:0004674	protein serine/threonine kinase activity	MF		1.18357e-07	0.000159431		0.000184289			7.30285e-05	5.66296e-17
GO:0046777	protein autophosphorylation	BP		2.564e-07	0.00056846		0.00224347			0.00357448	2.38976e-05
GO:0009055	electron carrier activity	MF		5.27384e-07	9.98402e-08		2.20345e-05	2.20767e-16		0.000116	7.33987e-06
GO:0006354	DNA-templated transcription, elongation	BP		6.32662e-07	0.0383667		6.03182e-07	2.01727e-07		0.00062967	0.0104701
GO:0010167	response to nitrate	BP		6.66975e-07	9.40761e-09		9.77424e-05	9.02435e-08		2.02258e-06	2.26616e-06
GO:0020037	heme binding	MF	0.033486	7.97178e-07	5.68476e-09		9.26939e-05	6.45213e-10		2.5142e-06	6.32934e-08
GO:0009800	cinnamic acid biosynthetic process	BP		8.68909e-07	3.22407e-05		1.61995e-07	0.00274946		1.15205e-06	1.08065e-05
GO:0004058	aromatic-L-amino-acid decarboxylase activity	MF		9.61227e-07	0.000320344		0.000553476	0.0148772		1.03788e-07	7.27169e-06
GO:0004837	tyrosine decarboxylase activity	MF		9.61227e-07	0.000320344		0.000553476	0.0148772		1.03788e-07	7.27169e-06
GO:0004497	monooxygenase activity	MF		1.06084e-06	0.0161696		0.000732317	0.000106588		0.000491259	0.000681221
GO:0000287	magnesium ion binding	MF		1.15151e-06	0.0495775						0.0083838
GO:0006091	generation of precursor metabolites and energy	BP		1.57057e-06	0.00648934		1.13414e-05	0.0291062		4.0645e-06	1.2533e-05
GO:0009626	plant-type hypersensitive response	BP		1.7007e-06	1.91025e-07		1.22107e-05	0.000739112		0.00362004	2.29497e-06
GO:0050162	oxalate oxidase activity	MF		1.79964e-06	3.75184e-07		6.12972e-06	0.000511764	0.0258944		1.7234e-08
GO:0010337	regulation of salicylic acid metabolic process	BP		1.80062e-06	0.000462929		0.00130184	0.00116501		0.000612928	2.00983e-05
GO:0010583	response to cyclopentenone	BP		2.0735e-06	6.94638e-14	0.0056707	0.00234978	2.54175e-13		0.000114862	6.95636e-06
GO:0046274	lignin catabolic process	BP		2.15779e-06	0.000189747		3.36693e-06	0.00481437		7.79684e-07	4.93901e-06
GO:0043565	sequence-specific DNA binding	MF		2.18758e-06	1.98496e-05		6.78405e-05	3.63741e-05		0.00032575	0.00671116
GO:0009646	response to absence of light	BP		2.20352e-06	0.00117397		3.40739e-05	1.29932e-05		0.000103658	7.26916e-06
GO:0031408	oxylipin biosynthetic process	BP		4.15009e-06	0.00762368		9.90774e-05			0.000142783	0.00234769
GO:0006855	drug transmembrane transport	BP		5.88444e-06	0.000243773		0.020439			6.87981e-07	2.41431e-06
GO:0009697	salicylic acid biosynthetic process	BP		6.06347e-06	1.75464e-11	0.00297815	2.48213e-05	2.25167e-05		0.0498855	2.44244e-12
GO:0010224	response to UV-B	BP		6.26308e-06	3.17868e-07		3.54936e-06	9.69836e-10		0.000100116	4.15768e-06
GO:0045548	phenylalanine ammonia-lyase activity	MF		6.78258e-06	8.20083e-05		1.6161e-06	0.00524259		5.22387e-07	5.61541e-05
GO:0002237	response to molecule of bacterial origin	BP		6.96337e-06	0.000183648		2.50384e-07			0.000289126	5.93752e-05
GO:0050691	regulation of defense response to virus by host	BP		7.06306e-06	3.02901e-05	0.0305977	0.000165659	0.00322296		1.18405e-06	6.21951e-07
GO:0031090	organelle membrane	CC		7.23127e-06	3.79764e-14		0.00104225	3.75613e-07		0.000972235	1.90746e-06
GO:0009835	fruit ripening	BP		8.22834e-06	9.85115e-05		9.64963e-08	8.33823e-06		1.52245e-08	4.81424e-06
GO:0008559	xenobiotic-transporting ATPase activity	MF		9.01462e-06	0.0122128				0.0380837	0.000623439	0.00053635
GO:0008652	cellular amino acid biosynthetic process	BP		9.31534e-06	0.0227951		1.32149e-05	0.00570516		4.68347e-05	0.00456967
GO:0042908	xenobiotic transport	BP		1.15217e-05	0.0147293				0.0390817	0.000720613	0.000653859
GO:0015706	nitrate transport	BP		1.43032e-05	2.2356e-07		0.000151114	3.28398e-06		1.34727e-05	1.41835e-05
GO:0008061	chitin binding	MF		1.47344e-05	8.46171e-10		1.81594e-05	1.4591e-07		0.000350313	3.74915e-11
GO:0031012	extracellular matrix	CC		1.81212e-05	1.53502e-07		0.000263944	9.47107e-05	0.0468488		1.48681e-07
GO:0009737	response to abscisic acid	BP	0.0440075	1.96911e-05	1.12054e-05		0.00440213	1.79024e-16		0.00170487	1.72895e-07
GO:0061025	membrane fusion	BP		2.04191e-05	1.13196e-09	0.018741	2.63288e-06	1.5429e-10		0.00221451	1.14358e-05
GO:0009816	defense response to bacterium, incompatible interaction	BP		2.18907e-05	0.000905456		0.000356931	0.000473608		7.76896e-05	1.98469e-06
GO:0033609	oxalate metabolic process	BP		2.36499e-05	2.93375e-05		5.50829e-05	0.00993711	0.0375261		7.90087e-07
GO:0009819	drought recovery	BP		2.92374e-05	9.78232e-06		7.13042e-06	0.00121749		2.32528e-06	0.000226946
GO:0043648	dicarboxylic acid metabolic process	BP		4.26629e-05	0.000995137
GO:0009625	response to insect	BP		4.2807e-05	0.0140252		0.0238246	0.0256109		0.0110632	0.00324773
GO:0009744	response to sucrose	BP		4.38892e-05	2.29146e-06		0.00920968	3.48375e-06		0.0220151	0.00855931
GO:0009759	indole glucosinolate biosynthetic process	BP		4.62196e-05	0.00404853		1.72963e-05	0.0018044		7.98145e-06	0.00380032
GO:0004568	chitinase activity	MF		5.17913e-05	8.72523e-08		0.000970059	1.19716e-05		0.00356904	2.45491e-08
GO:0010359	regulation of anion channel activity	BP		5.34944e-05	0.0249477	0.00448245					0.0291512
GO:0009581	detection of external stimulus	BP		5.65331e-05	0.000638647		6.32029e-05	0.038448		0.00090297	6.69119e-07
GO:0055114	oxidation-reduction process	BP		6.00899e-05	1.62889e-06		0.0011988	8.81639e-09		0.00030555	2.90868e-06
GO:0003700	transcription factor activity, sequence-specific DNA binding	MF		6.2448e-05	9.46121e-05	0.00381223	0.00338906	8.32457e-08		0.000362864	0.00754619
GO:0009817	defense response to fungus, incompatible interaction	BP		7.18258e-05	1.23645e-05	0.0151843	0.0181478	7.66123e-05		0.00161769	3.81363e-07
GO:0006559	L-phenylalanine catabolic process	BP		7.9588e-05	5.68201e-05		1.9845e-05	0.0159247		3.50479e-07	7.22899e-05
GO:0016021	integral component of membrane	CC		9.25775e-05	0.000999716		0.00596277			0.00248276	5.50917e-08
GO:0033807	icosanoyl-CoA synthase activity	MF		0.000101261	0.000593297		0.000513842	0.00509673		0.00024402	0.0358013
GO:0009555	pollen development	BP		0.000104757	9.28005e-05		1.77727e-07		0.0463007	0.000118432	0.00170628
GO:0010106	cellular response to iron ion starvation	BP		0.000116362	0.00937321		0.0101057	0.0413319		0.0113339	0.0235414
GO:0031328	positive regulation of cellular biosynthetic process	BP		0.000128293	3.49122e-06		0.000300458	1.2443e-07		0.000149795	0.00150153
GO:0003854	3-beta-hydroxy-delta5-steroid dehydrogenase activity	MF		0.000153765	0.000238045					0.0157415	0.0344433
GO:0046539	histamine N-methyltransferase activity	MF		0.000154343	0.00378782		8.8091e-05
GO:0048544	recognition of pollen	BP		0.000161154	0.000108641					7.2431e-05	6.36707e-06
GO:0005576	extracellular region	CC		0.000191683	2.87423e-06	0.0345178	0.0024271	1.97341e-05		0.00128734	1.17486e-08
GO:0045156	electron transporter, transferring electrons within the cyclic electron transport pathway of photosynthesis activity	MF		0.000193806			0.00154773
GO:0019825	oxygen binding	MF		0.000201157	0.00150557		0.0383241	0.0054373		0.00381629	0.00915398
GO:0005773	vacuole	CC		0.000221156	1.84945e-05	0.0429991	0.00485991	1.40156e-07		0.00810998	1.85342e-09
GO:0016165	linoleate 13S-lipoxygenase activity	MF		0.000221858	0.0264743		0.0104415	0.0325298		0.00598376	0.00754883
GO:0080148	negative regulation of response to water deprivation	BP		0.000244119	8.23642e-08		0.00189111			4.40481e-05	0.00102823
GO:0002213	defense response to insect	BP		0.000251629	0.00594393		0.0344785			0.000268467	0.00166327
GO:0044275	cellular carbohydrate catabolic process	BP		0.000253221	0.00140705				0.0422506	0.0486246	0.00193204
GO:0009809	lignin biosynthetic process	BP		0.000345459	0.000324836			0.000451899		0.0016612	0.0179288
GO:0044106	cellular amine metabolic process	BP		0.000351533	0.00128333		0.000906597			0.000283268
GO:0000038	very long-chain fatty acid metabolic process	BP		0.000369545	0.000676363		0.000334807	0.000153109		0.000550236	0.0466363
GO:0009685	gibberellin metabolic process	BP		0.000371153	0.00084822	0.0310959	0.000175812	0.000196853		1.28189e-06	3.98674e-05
GO:0044283	small molecule biosynthetic process	BP		0.000379542	0.0012811			0.0201096		0.000902736	0.026714
GO:0005509	calcium ion binding	MF		0.000402662	2.952e-05		0.00980487	2.23035e-05			0.000564318
GO:0031347	regulation of defense response	BP		0.000480941	0.00437467		0.0151652	0.000213687		0.000281617	0.000102025
GO:0048767	root hair elongation	BP		0.000490907			0.0171713
GO:0055062	phosphate ion homeostasis	BP		0.000503947	0.00695777		0.000200275	0.00135584		9.28409e-05	1.44711e-05
GO:0080043	quercetin 3-O-glucosyltransferase activity	MF		0.00053156	0.000206017		0.00459041	1.2571e-08		1.61309e-06	0.00452799
GO:0016045	detection of bacterium	BP		0.000551456	0.0104849	0.0297312	0.000893326			0.00232634	0.000786138
GO:0009699	phenylpropanoid biosynthetic process	BP		0.000612	1.2742e-06	0.0250578	0.000545377	3.95575e-06		0.00111379	0.000133255
GO:0047077	Photinus-luciferin 4-monooxygenase (ATP-hydrolyzing) activity	MF		0.000623846			0.0418156
GO:0005516	calmodulin binding	MF		0.00067007	2.00667e-05		0.00473804	0.000114491		0.00514022	2.27034e-07
GO:0047769	arogenate dehydratase activity	MF		0.000682336	0.0191189
GO:0004683	calmodulin-dependent protein kinase activity	MF		0.000689268	0.000378598						0.00432774
GO:0010119	regulation of stomatal movement	BP		0.000693248		0.0109868
GO:0009718	anthocyanin-containing compound biosynthetic process	BP		0.000711918	0.000423788		0.000100292	2.4156e-06		1.8953e-05	0.00133672
GO:0006032	chitin catabolic process	BP		0.000780801	2.74578e-06		0.000206205	0.000733089		0.0332493	6.45255e-06
GO:0016138	glycoside biosynthetic process	BP		0.000885273	0.00167598		0.00856465	0.00791769		4.64884e-05	0.00106654
GO:0030247	polysaccharide binding	MF		0.000993828	4.90221e-06		0.000263498	0.0337807		0.00519943	2.10706e-06
GO:0009751	response to salicylic acid	BP		0.00100232	3.80804e-05		0.0265757	7.74016e-08		0.0180723	0.00574108
GO:0048235	pollen sperm cell differentiation	BP		0.00101124	0.0265928		0.00150476			0.0190252	0.000431387
GO:0046429	4-hydroxy-3-methylbut-2-en-1-yl diphosphate synthase activity	MF		0.0010174	0.00981013		0.000617958	0.0202949			0.00205352
GO:0043619	regulation of transcription from RNA polymerase II promoter in response to oxidative stress	BP		0.00102147	0.01006	0.0119425	0.0492864	0.0207987		0.0405765
GO:2000068	regulation of defense response to insect	BP		0.00102147	0.01006	0.0119425	0.0492864	0.0207987		0.0405765
GO:0016206	catechol O-methyltransferase activity	MF		0.00103529	0.0441326		0.0229217	0.0301326		0.013691	0.0310775
GO:0009642	response to light intensity	BP		0.00107951	0.000555915		0.000429233	0.0197831		0.0356518	0.0321034
GO:0009899	ent-kaurene synthase activity	MF		0.00110559							0.0029296
GO:0080024	indolebutyric acid metabolic process	BP		0.00111216	0.000508369			0.00443259		0.00326006	0.0326993
GO:0009416	response to light stimulus	BP	0.0140891	0.00115699	6.23894e-05	0.0184329	6.00958e-05	0.000246351		0.00198107	0.000295977
GO:0000789	cytoplasmic chromatin	CC		0.00116287			0.000730621	0.0210094		0.000483475
GO:0005652	nuclear lamina	CC		0.00116287			0.000730621	0.0210094		0.000483475
GO:0097298	regulation of nucleus size	BP		0.00116287			0.000730621	0.0210094		0.000483475
GO:0016314	phosphatidylinositol-3,4,5-trisphosphate 3-phosphatase activity	MF		0.00116287	0.0101646		0.00077095
GO:0000428	DNA-directed RNA polymerase complex	CC		0.00116287	0.0101646		0.000849787	0.0210094		0.000483478	0.00212999
GO:0031225	anchored component of membrane	CC		0.00116768	0.00873949			0.00967786			0.00120158
GO:0045261	proton-transporting ATP synthase complex, catalytic core F(1)	CC		0.00119522			0.00601979			0.00344322	0.0324456
GO:0042631	cellular response to water deprivation	BP		0.00129764	6.89803e-07		0.00515762	9.7567e-05		0.000325168	0.000884143
GO:0046130	purine ribonucleoside catabolic process	BP		0.00131461					0.000153551	0.000336302	0.0117122
GO:0016705	oxidoreductase activity, acting on paired donors, with incorporation or reduction of molecular oxygen	MF		0.00133325			0.00695603	0.0164038		0.0120205	0.0459447
GO:0080002	UDP-glucose:4-aminobenzoate acylglucosyltransferase activity	MF		0.00134145	0.0206495			0.00611258		0.000248235	0.00600571
GO:1902479	positive regulation of defense response to bacterium, incompatible interaction	BP		0.00137926	0.0157531		0.0493888	0.00124432			0.00334188
GO:0009407	toxin catabolic process	BP		0.0014248	3.8301e-15	0.00240088	0.00334936	1.64085e-13	0.0438923	0.000143312	2.72154e-05
GO:0046482	para-aminobenzoic acid metabolic process	BP		0.00143905	1.94023e-07			7.45607e-07		0.0126607
GO:0000170	sphingosine hydroxylase activity	MF		0.00144377	0.000617598		2.25708e-05	0.0219366		1.04989e-05	1.45618e-05
GO:0042284	sphingolipid delta-4 desaturase activity	MF		0.00151251	0.000704355		2.48211e-05	0.0234784		1.1596e-05	1.67417e-05
GO:0004664	prephenate dehydratase activity	MF		0.00151886	0.0396975
GO:0009624	response to nematode	BP	0.0122197	0.00156185						0.0238291	0.00119887
GO:0004743	pyruvate kinase activity	MF		0.00163171	0.0186586						0.0360202
GO:0009739	response to gibberellin	BP		0.00170789	0.000310365	0.000261944		1.15997e-11			0.0354779
GO:0006997	nucleus organization	BP		0.00175591			0.000877173			0.0113428
GO:0031410	cytoplasmic vesicle	CC		0.0017944	1.18039e-05		5.88279e-05	0.0017831		0.000285972	0.00102218
GO:0009703	nitrate reductase (NADH) activity	MF		0.0018166	5.08916e-06	0.0498968		5.8743e-05
GO:0009772	photosynthetic electron transport in photosystem II	BP		0.00187681			0.0165241
GO:0009644	response to high light intensity	BP		0.00188643	0.0244462		0.0019947	1.00131e-05		0.00212054	0.0259985
GO:0015114	phosphate ion transmembrane transporter activity	MF		0.00195336			0.00869873	0.0126511			0.0171848
GO:0080045	quercetin 3'-O-glucosyltransferase activity	MF		0.00202401			0.00122146	0.0443684		0.000827589	0.00471671
GO:0080044	quercetin 7-O-glucosyltransferase activity	MF		0.00202707	0.000229278		0.00126021	1.28963e-09		2.52762e-07	0.00477711
GO:0016114	terpenoid biosynthetic process	BP		0.00204908	0.0120674			0.00771931			0.0488799
GO:0044459	plasma membrane part	CC		0.00210303	0.00017706					0.00165681	0.00275944
GO:0030243	cellulose metabolic process	BP		0.00217787		0.0454299	0.00297207			0.00620636
GO:0009832	plant-type cell wall biogenesis	BP		0.0022756			0.0173312
GO:0018874	benzoate metabolic process	BP		0.0023447						0.000642616	0.00743556
GO:0052639	salicylic acid glucosyltransferase (ester-forming) activity	MF		0.0023447						0.000642616	0.00743556
GO:0052640	salicylic acid glucosyltransferase (glucoside-forming) activity	MF		0.0023447						0.000642616	0.00743556
GO:0052641	benzoic acid glucosyltransferase activity	MF		0.0023447						0.000642616	0.00743556
GO:0000302	response to reactive oxygen species	BP		0.00248469							0.000345052
GO:0032787	monocarboxylic acid metabolic process	BP		0.00255248	0.00522301		0.0424958	0.000171564		0.0140462	0.0296776
GO:1901663	quinone biosynthetic process	BP		0.00255764	0.00111956		0.0204869	0.00579226			0.000516854
GO:0030170	pyridoxal phosphate binding	MF		0.00255916	0.00778483		0.00692505			0.000455533	0.0132434
GO:0005789	endoplasmic reticulum membrane	CC		0.00269438	1.77829e-06			0.000755797			0.0166439
GO:0015824	proline transport	BP		0.0027409	4.92178e-09		9.60694e-05	3.51359e-13		8.86522e-05	4.41872e-06
GO:0015152	glucose-6-phosphate transmembrane transporter activity	MF		0.00297207
GO:0015760	glucose-6-phosphate transport	BP		0.00297207
GO:0048569	post-embryonic animal organ development	BP		0.00301057			0.00340154	0.0135779		0.0248553	0.0495212
GO:0046658	anchored component of plasma membrane	CC		0.00303107	0.00105359	0.00332717	0.0127657	0.0019805			0.00161467
GO:0005199	structural constituent of cell wall	MF		0.0030453			0.00520831
GO:2000280	regulation of root development	BP		0.00308284	0.0158433		0.00129572	0.00864454		4.27195e-05	0.00226498
GO:0008631	intrinsic apoptotic signaling pathway in response to oxidative stress	BP		0.00309989	0.0282219	0.0180451	0.00189882			0.00128741	0.00614247
GO:0006686	sphingomyelin biosynthetic process	BP		0.00318034	0.0284269						0.00618939
GO:0046511	sphinganine biosynthetic process	BP		0.00318034	0.0284269						0.00618939
GO:0016126	sterol biosynthetic process	BP		0.00318629	0.0160755			0.0153841		0.0487366
GO:0030955	potassium ion binding	MF		0.00323776	0.040233
GO:0009850	auxin metabolic process	BP		0.00328148	0.0119417	0.03056			0.0473306	0.014516
GO:0030246	carbohydrate binding	MF		0.00333563	0.0476107			0.00167114		0.0266865	0.00110182
GO:0006571	tyrosine biosynthetic process	BP		0.00335609	0.0154586		0.0244806
GO:0052638	indole-3-butyrate beta-glucosyltransferase activity	MF		0.00337105	0.0154143					0.000934481	0.0103055
GO:0016166	phytoene dehydrogenase activity	MF		0.00337651	0.0284451						0.00619356
GO:0016207	4-coumarate-CoA ligase activity	MF		0.00340239			0.0251847	0.0439097
GO:1901002	positive regulation of response to salt stress	BP		0.00355765	0.0157902		0.0255278				0.010353
GO:0016621	cinnamoyl-CoA reductase activity	MF		0.00378181	0.00447923
GO:0004758	serine C-palmitoyltransferase activity	MF		0.00381177	0.000242781		0.0265717			0.0183998	0.000973267
GO:0010287	plastoglobule	CC		0.00385643			0.0105905			0.0480897
GO:0015120	phosphoglycerate transmembrane transporter activity	MF		0.00392438			0.0270696
GO:0015713	phosphoglycerate transport	BP		0.00392438			0.0270696
GO:0050662	coenzyme binding	MF		0.0039528	0.00149594					0.00647502	0.00186843
GO:0044255	cellular lipid metabolic process	BP		0.00399086	0.000135774	0.0235932	0.00144434	0.00433515		0.00317961	0.0041499
GO:0009684	indoleacetic acid biosynthetic process	BP		0.00402767	4.61176e-05			0.0256034		0.00184889
GO:0009698	phenylpropanoid metabolic process	BP		0.00412139			0.000924037	0.00495656		0.0245782
GO:0030148	sphingolipid biosynthetic process	BP		0.00413225	3.38677e-06						0.000853175
GO:0047461	(+)-delta-cadinene synthase activity	MF		0.00433841
GO:0046512	sphingosine biosynthetic process	BP		0.00438642	0.000283952		0.0294259			0.0202841	0.00108515
GO:0048354	mucilage biosynthetic process involved in seed coat development	BP		0.00441475	0.00409169						0.0156461
GO:0048653	anther development	BP		0.00443932	0.00268374	0.0237917	0.0371822	4.03107e-05			0.0178637
GO:0046933	proton-transporting ATP synthase activity, rotational mechanism	MF		0.00444377			0.0101395	0.0286177		0.00513584
GO:0009643	photosynthetic acclimation	BP		0.00448344
GO:0031640	killing of cells of other organism	BP		0.00448416	0.0261377			0.00141513			0.00369156
GO:0004675	transmembrane receptor protein serine/threonine kinase activity	MF		0.00451338	2.57813e-05	0.00430478		0.00108532		0.0294437	6.08645e-06
GO:0071475	cellular hyperosmotic salinity response	BP		0.00458232	0.0218001					0.00128504	0.0135014
GO:0043562	cellular response to nitrogen levels	BP		0.00461937	3.34705e-05		0.00191334	0.0359931		0.000913567	0.00311504
GO:0015979	photosynthesis	BP		0.00469754			0.0295346
GO:0015714	phosphoenolpyruvate transport	BP		0.00471746			0.030052
GO:0045735	nutrient reservoir activity	MF		0.00472355	0.000592849		0.00551352				0.0013517
GO:0006952	defense response	BP		0.00480791	0.000659281	0.012051	0.0419708	0.00147095			8.4303e-05
GO:0004864	protein phosphatase inhibitor activity	MF		0.00488138	2.74725e-08		0.0163528	7.02903e-11			0.00406223
GO:0035436	triose phosphate transmembrane transport	BP		0.00488287			0.0309952
GO:0016710	trans-cinnamate 4-monooxygenase activity	MF		0.00492328	0.00322873		4.59557e-05			2.55378e-05	0.0107665
GO:0045493	xylan catabolic process	BP		0.00494103	0.0197594		0.00206963	0.010303		0.0100711
GO:2000889	cellodextrin metabolic process	BP		0.00494103	0.0197594		0.00206963	0.010303		0.0100711
GO:0009863	salicylic acid mediated signaling pathway	BP		0.00501308	5.00977e-10	0.00768856	0.00161256	2.50805e-11			2.37619e-05
GO:0010181	FMN binding	MF		0.00532053	0.0176997		0.00650613			0.00243126	0.00106705
GO:0009094	L-phenylalanine biosynthetic process	BP		0.00549108	0.0262753
GO:0008216	spermidine metabolic process	BP		0.00573341	0.00361139			0.0103678
GO:0047083	5-O-(4-coumaroyl)-D-quinate 3'-monooxygenase activity	MF		0.00573341	0.00361139			0.0103678
GO:0019752	carboxylic acid metabolic process	BP		0.00589612	0.00194821		0.0332847			0.0395832
GO:0004575	sucrose alpha-glucosidase activity	MF		0.00627363	0.0246955		0.0205646				0.000523904
GO:0070742	C2H2 zinc finger domain binding	MF		0.00630353						0.0026673	0.0139595
GO:0000162	tryptophan biosynthetic process	BP		0.00640147	0.0319633
GO:0009207	purine ribonucleoside triphosphate catabolic process	BP		0.00675233					0.000469705	0.00173745
GO:0009789	positive regulation of abscisic acid-activated signaling pathway	BP		0.0067549	0.0130226	0.0400247					0.0312923
GO:0048038	quinone binding	MF		0.00677297			0.00290029			0.00138523	0.0248715
GO:0000254	C-4 methylsterol oxidase activity	MF		0.00686287	0.00128841		0.000213661	0.0352866		0.000101177	0.000241842
GO:0009154	purine ribonucleotide catabolic process	BP		0.00688548					0.000472794	0.00176968
GO:0000747	conjugation with cellular fusion	BP		0.00718235				0.0195127			0.000717767
GO:0006826	iron ion transport	BP		0.00736455	0.00462987		0.0389695	0.00519739			0.0153152
GO:0018130	heterocycle biosynthetic process	BP		0.00751002	0.00353845		0.000392978	0.00222062		0.0246272	0.00407173
GO:0006857	oligopeptide transport	BP		0.00754767			0.0142846	0.00883265			0.00594378
GO:0001106	RNA polymerase II transcription corepressor activity	MF		0.00767376			0.00404703
GO:0010227	floral organ abscission	BP		0.00775082
GO:0006863	purine nucleobase transport	BP		0.00776182	0.000826175			0.00136045
GO:0016168	chlorophyll binding	MF		0.00777524			0.0154271			0.0444846
GO:0009814	defense response, incompatible interaction	BP		0.00780206			0.0113068			0.0251429
GO:0009690	cytokinin metabolic process	BP		0.00792887	0.00275221	0.0435269				0.0258894	0.0126038
GO:0035435	phosphate ion transmembrane transport	BP		0.00794238				0.0335818
GO:0019748	secondary metabolic process	BP		0.00810436			0.0317475	0.0243129		0.0324981
GO:0009696	salicylic acid metabolic process	BP		0.00824315	0.0487318			0.00245759		0.00235681	0.0254271
GO:0019897	extrinsic component of plasma membrane	CC		0.00834415	0.00715634			0.0199868			0.0168757
GO:0051090	regulation of sequence-specific DNA binding transcription factor activity	BP		0.00834502		0.0281099
GO:0015297	antiporter activity	MF		0.00836765	0.0144743			0.00817875		0.0072664	0.0309157
GO:0046513	ceramide biosynthetic process	BP		0.00852533	0.00840014			0.00150265			0.00278689
GO:0003825	alpha,alpha-trehalose-phosphate synthase (UDP-forming) activity	MF		0.00870443						0.031958	0.00231292
GO:0005524	ATP binding	MF		0.00874891						0.00961591	1.99437e-07
GO:0030145	manganese ion binding	MF		0.00881729	0.000533333		0.00986632	0.0468568			0.000182545
GO:0004834	tryptophan synthase activity	MF		0.00885203
GO:0006816	calcium ion transport	BP		0.00903999			0.028448		0.0154712
GO:0007030	Golgi organization	BP		0.00907542	0.0065855	0.0383552			0.0438572	0.0101394
GO:0080054	low-affinity nitrate transmembrane transporter activity	MF		0.00942935				0.0230439		0.0039686
GO:0080055	low-affinity nitrate transport	BP		0.00942935				0.0230439		0.0039686
GO:0016847	1-aminocyclopropane-1-carboxylate synthase activity	MF		0.00966748			0.00597027			0.00407277	0.0190317
GO:0042218	1-aminocyclopropane-1-carboxylate biosynthetic process	BP		0.00966748			0.00597027			0.00407277	0.0190317
GO:0034440	lipid oxidation	BP		0.0102702			0.00634011			0.00435487	0.0191379
GO:0044724	single-organism carbohydrate catabolic process	BP		0.0103156			0.023593				0.00613585
GO:0006754	ATP biosynthetic process	BP		0.010483							0.0139328
GO:0010143	cutin biosynthetic process	BP		0.0106281
GO:0042128	nitrate assimilation	BP		0.0107574	0.00542704		0.0154879			0.0317073
GO:0009932	cell tip growth	BP		0.0108626			0.0402972
GO:0035339	SPOTS complex	CC		0.0109269	0.000867437			0.0327302			0.0012838
GO:0045431	flavonol synthase activity	MF		0.0112163	7.63807e-05	0.0126914	0.0308281	0.0191289			0.0422725
GO:0000187	activation of MAPK activity	BP		0.0115168						0.0368912
GO:0010152	pollen maturation	BP		0.0115408
GO:0006694	steroid biosynthetic process	BP		0.0116177	0.012176
GO:0010413	glucuronoxylan metabolic process	BP		0.011662			0.0102611	0.00439126			0.00684834
GO:0034389	lipid particle organization	BP		0.0116676
GO:0004048	anthranilate phosphoribosyltransferase activity	MF		0.0116906				0.0361885
GO:0015238	drug transmembrane transporter activity	MF		0.0118129	0.00459287		0.0129335	0.0300227		0.00105404	0.0268916
GO:0007166	cell surface receptor signaling pathway	BP		0.0118738	0.035104						0.000705005
GO:0005794	Golgi apparatus	CC		0.0121665	0.000504839		0.00079632	0.000196898		0.016462	0.0209896
GO:0004558	alpha-1,4-glucosidase activity	MF		0.012441			0.0343458				0.00145732
GO:0070469	respiratory chain	CC		0.0126708				0.000291899			0.03751
GO:0009505	plant-type cell wall	CC	0.0374321	0.0129423			0.0166637				0.0353318
GO:0009617	response to bacterium	BP		0.0130357	0.000476234					0.0320829	0.00227385
GO:0022900	electron transport chain	BP		0.0131283	0.00694811	0.00358202		4.00247e-07
GO:0006066	alcohol metabolic process	BP		0.0132717	0.024038						0.00300914
GO:0031957	very long-chain fatty acid-CoA ligase activity	MF		0.013346
GO:0042777	plasma membrane ATP synthesis coupled proton transport	BP		0.0135276			0.006848			0.00399246	0.0365786
GO:0016131	brassinosteroid metabolic process	BP		0.0138833			0.000115242	0.00456122		0.00216716	0.000217228
GO:0019216	regulation of lipid metabolic process	BP		0.0141464			0.00513006
GO:0004190	aspartic-type endopeptidase activity	MF		0.0142117			0.0199171			0.00592365	0.00878263
GO:0000312	plastid small ribosomal subunit	CC		0.0142646			0.00886801				0.0299997
GO:0042178	xenobiotic catabolic process	BP		0.0143121						0.00601354
GO:0050505	hydroquinone glucosyltransferase activity	MF		0.0143121						0.00601354
GO:0004708	MAP kinase kinase activity	MF		0.0146579						0.0434306
GO:0009815	1-aminocyclopropane-1-carboxylate oxidase activity	MF		0.0149253				0.0359162		0.00438208	0.0452404
GO:0051607	defense response to virus	BP		0.0149297			0.0205396	0.0186688
GO:0009715	chalcone biosynthetic process	BP		0.0149473	0.0207921						0.0324875
GO:0045492	xylan biosynthetic process	BP		0.0150733			0.0129452	0.00521704			0.00963218
GO:0009727	detection of ethylene stimulus	BP		0.015318				0.0338766		0.00451892	0.044142
GO:0031098	stress-activated protein kinase signaling cascade	BP		0.0154371							0.0189007
GO:0043447	alkane biosynthetic process	BP		0.01564	0.0185513	0.0372203		0.00677091
GO:0004903	growth hormone receptor activity	MF		0.0159016			0.00988233				0.0282203
GO:0009686	gibberellin biosynthetic process	BP		0.0159688				0.00367321
GO:0004012	phospholipid-translocating ATPase activity	MF		0.0160228						0.0471872	0.0372186
GO:0006983	ER overload response	BP		0.016048	0.0209204		0.00994113			0.00681698	0.0326288
GO:0046975	histone methyltransferase activity (H3-K36 specific)	MF		0.016077
GO:0008152	metabolic process	BP		0.0162844						0.0448697
GO:0006499	N-terminal protein myristoylation	BP		0.0163981	0.00948296			0.0336824			0.0151882
GO:0009670	triose-phosphate:phosphate antiporter activity	MF		0.0167991			0.0104045				0.0347773
GO:0043481	anthocyanin accumulation in tissues in response to UV light	BP		0.0168143		0.00547808	0.0192628			0.0385873
GO:0005315	inorganic phosphate transmembrane transporter activity	MF		0.0171586			0.0421917
GO:0009423	chorismate biosynthetic process	BP		0.0173553
GO:0010025	wax biosynthetic process	BP		0.017469
GO:0009682	induced systemic resistance	BP		0.0180603
GO:0010295	(+)-abscisic acid 8'-hydroxylase activity	MF		0.0183675	0.0246759
GO:0046345	abscisic acid catabolic process	BP		0.0183675	0.0246759
GO:0008378	galactosyltransferase activity	MF		0.0185371							0.00373365
GO:0045332	phospholipid translocation	BP		0.0187814							0.0434339
GO:0046686	response to cadmium ion	BP		0.0188005	9.76357e-14	0.00248797	0.0174082	1.05464e-13		0.00356598	0.00123133
GO:0005783	endoplasmic reticulum	CC		0.0192403	1.31141e-06		0.00715027	9.87612e-06		0.00233669	0.00481137
GO:0016629	12-oxophytodienoate reductase activity	MF		0.0197265						0.000301112	0.00355505
GO:0010109	regulation of photosynthesis	BP		0.019834
GO:0080102	3-methylthiopropyl glucosinolate S-oxygenase activity	MF		0.0199228
GO:0080103	4-methylthiopropyl glucosinolate S-oxygenase activity	MF		0.0199228
GO:0080104	5-methylthiopropyl glucosinolate S-oxygenase activity	MF		0.0199228
GO:0080105	6-methylthiopropyl glucosinolate S-oxygenase activity	MF		0.0199228
GO:0080106	7-methylthiopropyl glucosinolate S-oxygenase activity	MF		0.0199228
GO:0080107	8-methylthiopropyl glucosinolate S-oxygenase activity	MF		0.0199228
GO:0015121	phosphoenolpyruvate:phosphate antiporter activity	MF		0.0199289			0.0123722				0.0414094
GO:0004473	malate dehydrogenase (decarboxylating) (NADP+) activity	MF		0.0200335			0.0125015	0.0105572		0.00859075	0.0029562
GO:0007585	respiratory gaseous exchange	BP		0.0205368							0.0425547
GO:0080086	stamen filament development	BP		0.0206307			0.0128233			0.00884087	0.0409394
GO:0000805	X chromosome	CC		0.0207316
GO:0000806	Y chromosome	CC		0.0207316
GO:0032298	positive regulation of DNA-dependent DNA replication initiation	BP		0.0207316
GO:0035173	histone kinase activity	MF		0.0207316
GO:0008752	FMN reductase activity	MF		0.0209338			0.0162174
GO:1900117	regulation of execution phase of apoptosis	BP		0.0209647		0.0423239	0.0141718			0.00903851	0.0381864
GO:0018293	protein-FAD linkage	BP		0.0213498			0.0165386		0.000864002
GO:0010244	response to low fluence blue light stimulus by blue low-fluence system	BP		0.0215879	0.031531
GO:0003841	1-acylglycerol-3-phosphate O-acyltransferase activity	MF		0.0217777
GO:0052386	cell wall thickening	BP		0.0218717			0.0169419				0.0341947
GO:0070301	cellular response to hydrogen peroxide	BP	0.00994375	0.0219869						0.00286407
GO:0000122	negative regulation of transcription from RNA polymerase II promoter	BP		0.0221415			0.00770197
GO:0009506	plasmodesma	CC		0.0223844	0.0202026			4.95058e-06			0.0178778
GO:0009825	multidimensional cell growth	BP		0.0225143
GO:0005758	mitochondrial intermembrane space	CC		0.0227106
GO:0010120	camalexin biosynthetic process	BP		0.0227596						0.00685355
GO:0006633	fatty acid biosynthetic process	BP		0.0228275	7.24231e-05			0.0480413		0.0258587	0.031988
GO:0003958	NADPH-hemoprotein reductase activity	MF		0.0229332							0.0445227
GO:0008762	UDP-N-acetylmuramate dehydrogenase activity	MF		0.0229668			0.0101039	0.0225084		0.0323726	0.0205999
GO:0090480	purine nucleotide-sugar transmembrane transport	BP		0.0229669	0.0341989
GO:0008194	UDP-glycosyltransferase activity	MF		0.0230165	0.00745856		0.0375707	9.54459e-08		0.0202687	0.0366685
GO:0044281	small molecule metabolic process	BP		0.023177	0.00278216			0.0175769			0.0123875
GO:0035308	negative regulation of protein dephosphorylation	BP		0.0233144	0.00563244
GO:0009916	alternative oxidase activity	MF		0.0233234							0.0486509
GO:0000325	plant-type vacuole	CC		0.0234934	0.0192273			0.018287	0.00277607		0.0134984
GO:0016049	cell growth	BP		0.0235462	0.00832536
GO:0010033	response to organic substance	BP		0.0236955	0.0174413			0.00346407		0.00315649	0.0213804
GO:0004872	receptor activity	MF		0.0237312	0.00186341		0.00699815	0.000574192			0.00899599
GO:1900140	regulation of seedling development	BP		0.0237521	0.031017		0.0148705				0.0421289
GO:0048838	release of seed from dormancy	BP		0.0238024	0.0365183
GO:0009823	cytokinin catabolic process	BP		0.0238214		0.0459423	0.0148662	0.00223915		0.0102032	0.0478302
GO:0010055	atrichoblast differentiation	BP		0.0238771			0.0184969			0.0152228	0.0370841
GO:0050589	leucocyanidin oxygenase activity	MF		0.0240535	0.00591579	0.00099123	0.0149228
GO:0050630	(iso)eugenol O-methyltransferase activity	MF		0.0243192
GO:0006898	receptor-mediated endocytosis	BP		0.0244933			0.0412784
GO:0052544	defense response by callose deposition in cell wall	BP		0.02489						0.0348193
GO:0006520	cellular amino acid metabolic process	BP		0.0250845	0.00279319					0.0288304
GO:0033506	glucosinolate biosynthetic process from homomethionine	BP		0.025137
GO:0009629	response to gravity	BP		0.0261133	0.0450929
GO:0048480	stigma development	BP		0.0262867	0.044561					0.0112886	0.00537367
GO:0030163	protein catabolic process	BP		0.0263702			0.0219567			0.00802957	0.00604058
GO:0050829	defense response to Gram-negative bacterium	BP		0.0265025	0.00773508	0.0499011		0.0275459
GO:1905034	regulation of antifungal innate immune response	BP		0.0269155			0.0208758			0.0171611	0.0411396
GO:0080046	quercetin 4'-O-glucosyltransferase activity	MF		0.0278041				0.00263989
GO:0047209	coniferyl-alcohol glucosyltransferase activity	MF		0.0278184
GO:0019932	second-messenger-mediated signaling	BP		0.0279728
GO:0016782	transferase activity, transferring sulfur-containing groups	MF		0.0280763			0.0217956			0.0179106	0.0425278
GO:0000249	C-22 sterol desaturase activity	MF		0.0282309			0.0219187			0.0180109	0.0427037
GO:0048364	root development	BP		0.0285507						0.0312725
GO:0009931	calcium-dependent protein serine/threonine kinase activity	MF		0.0292493				0.0266587
GO:0045543	gibberellin 2-beta-dioxygenase activity	MF		0.0293672
GO:0007275	multicellular organism development	BP		0.0295904							0.000165805
GO:0046165	alcohol biosynthetic process	BP		0.0297731	0.004269			0.00120692
GO:0016132	brassinosteroid biosynthetic process	BP		0.0298924				0.0120343
GO:0050992	dimethylallyl diphosphate biosynthetic process	BP		0.0299651			0.0233101				0.0444939
GO:0006915	apoptotic process	BP		0.0303396	0.0223859
GO:0046409	p-coumarate 3-hydroxylase activity	MF		0.0303424
GO:0010452	histone H3-K36 methylation	BP		0.0304149
GO:0080169	cellular response to boron-containing substance deprivation	BP		0.0304814			0.0237288			0.0194887	0.0449448
GO:0052615	ent-kaurene oxidase activity	MF		0.0305203							0.0449769
GO:0033550	MAP kinase tyrosine phosphatase activity	MF		0.0305718			0.0238023				0.0450188
GO:0043231	intracellular membrane-bounded organelle	CC		0.031244	3.89588e-05		0.00616156	7.05249e-10		0.000278295	0.0105551
GO:0003866	3-phosphoshikimate 1-carboxyvinyltransferase activity	MF		0.0314041
GO:0018920	glyphosate metabolic process	BP		0.0314041
GO:0090448	glucosinolate:proton symporter activity	MF		0.0317253						0.0203262
GO:0090449	phloem glucosinolate loading	BP		0.0317253						0.0203262
GO:1901349	glucosinolate transport	BP		0.0317253						0.0203262
GO:0010155	regulation of proton transport	BP		0.0320324						0.0449701
GO:0030076	light-harvesting complex	CC		0.0320334
GO:0042392	sphingosine-1-phosphate phosphatase activity	MF		0.0324232							0.0460808
GO:0016210	naringenin-chalcone synthase activity	MF		0.0326728	0.0119738
GO:0009627	systemic acquired resistance	BP		0.0327786	1.80794e-09		0.0115571	4.84424e-05			8.9832e-07
GO:0015970	guanosine tetraphosphate biosynthetic process	BP		0.0335							0.0461672
GO:0016759	cellulose synthase activity	MF		0.0340738			0.0265747			0.0219742	0.0461672
GO:0080021	response to benzoic acid	BP		0.0341179							0.0461672
GO:0008301	DNA binding, bending	MF		0.0341179							0.0461672
GO:0050708	regulation of protein secretion	BP		0.0341179
GO:0008569	ATP-dependent microtubule motor activity, minus-end-directed	MF		0.0341179
GO:0007037	vacuolar phosphate transport	BP		0.0341179			0.0277961
GO:0071629	ubiquitin-dependent catabolism of misfolded proteins by cytoplasm-associated proteasome	BP		0.0341179
GO:0070064	proline-rich region binding	MF		0.0341179			0.0279983			0.0220055
GO:1902417	(+)-abscisic acid D-glucopyranosyl ester transmembrane transporter activity	MF		0.0341179
GO:1902418	(+)-abscisic acid D-glucopyranosyl ester transmembrane transport	BP		0.0341179
GO:0016116	carotenoid metabolic process	BP		0.0341179			0.0293124
GO:0003842	1-pyrroline-5-carboxylate dehydrogenase activity	MF		0.0341179
GO:0005634	nucleus	CC		0.0341409	5.00228e-05		0.0416555	1.22475e-09
GO:0008324	cation transmembrane transporter activity	MF		0.0343392	0.0183116		0.0422053	0.0422451		0.00468472	0.022813
GO:0043161	proteasome-mediated ubiquitin-dependent protein catabolic process	BP		0.0354813	1.39996e-08		0.00291601	6.38452e-20			0.000170016
GO:0009786	regulation of asymmetric cell division	BP		0.0360979	0.0108149		0.0228013	0.0374327			0.00787207
GO:0005496	steroid binding	MF		0.036104			0.0230009	0.0359553			0.0075958
GO:0006733	oxidoreduction coenzyme metabolic process	BP		0.0366723
GO:0051745	4-hydroxy-3-methylbut-2-en-1-yl diphosphate reductase activity	MF		0.0371112			0.0290066
GO:0016706	oxidoreductase activity, acting on paired donors, with incorporation or reduction of molecular oxygen, 2-oxoglutarate as one donor, and incorporation of one atom each of oxygen into both donors	MF		0.0375127						0.0473067
GO:0009922	fatty acid elongase activity	MF		0.0378228	0.00189675			0.00138013
GO:0044272	sulfur compound biosynthetic process	BP		0.0382491			0.0201856
GO:0006568	tryptophan metabolic process	BP		0.0382848			0.0300109			0.0247907
GO:0097305	response to alcohol	BP		0.0386625	0.0290657		0.00081563	2.97462e-06
GO:0000041	transition metal ion transport	BP		0.0386908	0.0253598			0.00258234			0.018354
GO:0060862	negative regulation of floral organ abscission	BP		0.0392279			0.0305473
GO:0046034	ATP metabolic process	BP		0.0395246					8.04506e-05	0.00497247
GO:0009741	response to brassinosteroid	BP		0.0400283			0.00320991	4.17206e-05
GO:0018580	nitronate monooxygenase activity	MF		0.0402013			0.0313239
GO:0009636	response to toxic substance	BP		0.040296	5.59945e-05		0.0472079	0.000217016		3.41754e-05	0.0353079
GO:0065003	macromolecular complex assembly	BP		0.0404297
GO:0046688	response to copper ion	BP		0.0409311				0.02104			0.024664
GO:0046474	glycerophospholipid biosynthetic process	BP		0.0410364			0.0259015
GO:2000038	regulation of stomatal complex development	BP		0.0415885						0.0181282
GO:0004871	signal transducer activity	MF		0.0418258	0.0277308		0.00794283				0.0396058
GO:0004035	alkaline phosphatase activity	MF		0.0419342			0.034078
GO:0044212	transcription regulatory region DNA binding	MF		0.0419609	0.00016031		0.00304911	9.09486e-07		0.0165766
GO:0042744	hydrogen peroxide catabolic process	BP	0.0142911	0.0426197	0.023431			0.0196138		0.00379806	0.0100331
GO:0015884	folic acid transport	BP		0.0426944
GO:0050515	4-(cytidine 5'-diphospho)-2-C-methyl-D-erythritol kinase activity	MF		0.0436589
GO:0009539	photosystem II reaction center	CC		0.0438548			0.0340686
GO:0010072	primary shoot apical meristem specification	BP		0.0441501
GO:0009647	skotomorphogenesis	BP		0.0450855
GO:0015446	ATPase-coupled arsenite transmembrane transporter activity	MF		0.0452368
GO:0010584	pollen exine formation	BP		0.0456054	0.0066884		0.0187578	0.0246974
GO:0050468	reticuline oxidase activity	MF		0.0457896	0.0216931		0.028861	0.0165069			0.0134466
GO:0045595	regulation of cell differentiation	BP		0.0458189
GO:0016926	protein desumoylation	BP		0.0459702
GO:0034976	response to endoplasmic reticulum stress	BP		0.0466635	1.21151e-07	0.0165929		9.70608e-08			0.000429298
GO:0051924	regulation of calcium ion transport	BP		0.0468372			0.0366363
GO:0004648	O-phospho-L-serine:2-oxoglutarate aminotransferase activity	MF		0.0469259			0.0364545
GO:0047220	galactosylxylosylprotein 3-beta-galactosyltransferase activity	MF		0.0471707			0.0257538				0.0255055
GO:0046520	sphingoid biosynthetic process	BP		0.0475227	0.00113312		0.0219518	9.20183e-05		0.0113428	0.0149618
GO:0010268	brassinosteroid homeostasis	BP		0.0476661			0.00415503				0.0467133
GO:0001578	microtubule bundle formation	BP		0.0477669
GO:0052747	sinapyl alcohol dehydrogenase activity	MF		0.0480565	0.0232101
GO:0006865	amino acid transport	BP		0.0482101	1.44855e-05		0.00447666	0.000441119			0.000342654
GO:0008514	organic anion transmembrane transporter activity	MF		0.0483586	0.00351331			0.00293512
GO:0071555	cell wall organization	BP		0.0494242			0.0247183
GO:0061630	ubiquitin protein ligase activity	MF			0.000271323		0.0139203	2.87095e-11			0.00309857
GO:0010427	abscisic acid binding	MF			3.75604e-06			1.60559e-10			0.00745931
GO:0080163	regulation of protein serine/threonine phosphatase activity	BP			0.00077869			4.26384e-10
GO:0080129	proteasome core complex assembly	BP			0.0113727			8.38596e-10
GO:0006661	phosphatidylinositol biosynthetic process	BP			0.000316776			7.17926e-09
GO:0051788	response to misfolded protein	BP			0.0434469			1.1747e-08
GO:0060416	response to growth hormone	BP			2.67072e-08			1.66001e-08		0.00391164	0.0415201
GO:0045892	negative regulation of transcription, DNA-templated	BP			2.29216e-05		0.0492057	1.31499e-07			0.00186567
GO:0042256	mature ribosome assembly	BP						2.60307e-07
GO:0022627	cytosolic small ribosomal subunit	CC						4.20729e-07
GO:2000117	negative regulation of cysteine-type endopeptidase activity	BP			0.00348255			6.6085e-07
GO:0009507	chloroplast	CC						7.5579e-07
GO:0015450	P-P-bond-hydrolysis-driven protein transmembrane transporter activity	MF						1.08709e-06	0.0428406
GO:0031305	integral component of mitochondrial inner membrane	CC			0.00289299			1.23772e-06
GO:0015035	protein disulfide oxidoreductase activity	MF			0.00639118			1.29847e-06
GO:0008121	ubiquinol-cytochrome-c reductase activity	MF						1.67434e-06
GO:0010286	heat acclimation	BP			0.000995367			1.77724e-06
GO:0015266	protein channel activity	MF						2.37716e-06
GO:0050403	trans-zeatin O-beta-D-glucosyltransferase activity	MF			0.00948066			2.50389e-06
GO:0031351	integral component of plastid membrane	CC			0.00923689			4.48219e-06
GO:0044238	primary metabolic process	BP			1.6795e-07			5.4937e-06		4.9975e-05	0.00794487
GO:0022625	cytosolic large ribosomal subunit	CC						5.57473e-06
GO:0009853	photorespiration	BP						6.92774e-06
GO:0030150	protein import into mitochondrial matrix	BP						1.12605e-05
GO:0005747	mitochondrial respiratory chain complex I	CC						1.14187e-05
GO:0046916	cellular transition metal ion homeostasis	BP						1.66149e-05			0.0307949
GO:0016998	cell wall macromolecule catabolic process	BP			6.90888e-06		0.030682	1.96631e-05			3.79588e-07
GO:0005774	vacuolar membrane	CC			0.0371963			2.32705e-05
GO:0005744	mitochondrial inner membrane presequence translocase complex	CC						2.4347e-05
GO:0003735	structural constituent of ribosome	MF						2.48554e-05
GO:0005829	cytosol	CC			1.56512e-06	0.00393395		3.79689e-05
GO:0045454	cell redox homeostasis	BP						4.11427e-05
GO:0006970	response to osmotic stress	BP						4.36426e-05			0.0214027
GO:0016707	gibberellin 3-beta-dioxygenase activity	MF						4.38787e-05
GO:0042787	protein ubiquitination involved in ubiquitin-dependent protein catabolic process	BP			0.0014238			6.93648e-05
GO:0030162	regulation of proteolysis	BP			0.0413097			7.95503e-05
GO:0009704	de-etiolation	BP			5.15186e-05			0.000109024		0.00349786
GO:0016758	transferase activity, transferring hexosyl groups	MF						0.000113187
GO:0080030	methyl indole-3-acetate esterase activity	MF			0.00012773			0.000116137		0.0227138	0.00422842
GO:0051537	2 iron, 2 sulfur cluster binding	MF						0.00011649
GO:0008270	zinc ion binding	MF				0.0395884		0.000126378
GO:0031205	endoplasmic reticulum Sec complex	CC			0.00100999			0.000130418
GO:0080031	methyl salicylate esterase activity	MF			0.000694396			0.000141563			0.0104776
GO:0045935	positive regulation of nucleobase-containing compound metabolic process	BP			0.0377773			0.000147811
GO:0044710	single-organism metabolic process	BP						0.00015415			0.001939
GO:0045158	electron transporter, transferring electrons within cytochrome b6/f complex of photosystem II activity	MF						0.000158031
GO:0080032	methyl jasmonate esterase activity	MF			0.000238198			0.000169901			0.0111861
GO:0009299	mRNA transcription	BP						0.000171987
GO:0048046	apoplast	CC	0.0454988		0.00014195	0.00588456	0.0451532	0.00017335		0.0469047	2.24257e-05
GO:0000149	SNARE binding	MF						0.000181889
GO:0031901	early endosome membrane	CC			0.000644572			0.0001823
GO:0051865	protein autoubiquitination	BP			1.73366e-05			0.000190543			0.000838417
GO:0071452	cellular response to singlet oxygen	BP						0.000194444
GO:0071840	cellular component organization or biogenesis	BP			0.000265936			0.000196636			0.0177072
GO:0044237	cellular metabolic process	BP			0.03212			0.000229675		0.00255606
GO:0009536	plastid	CC						0.000245191
GO:0044390	ubiquitin-like protein conjugating enzyme binding	MF			0.016648			0.000261072
GO:0009788	negative regulation of abscisic acid-activated signaling pathway	BP						0.000263477
GO:0006521	regulation of cellular amino acid metabolic process	BP						0.00026448
GO:0098755	maintenance of seed dormancy by absisic acid	BP						0.000293613
GO:0004364	glutathione transferase activity	MF			8.04188e-07			0.000313746	0.00755867	0.00461274	0.00987499
GO:0043090	amino acid import	BP			0.000837175		0.00228552	0.000321576			0.000603252
GO:0097249	mitochondrial respiratory chain supercomplex	CC			7.46731e-05			0.00032345
GO:0071216	cellular response to biotic stimulus	BP			0.00592828			0.000348126			0.000955276
GO:0050897	cobalt ion binding	MF						0.000353613
GO:0006888	ER to Golgi vesicle-mediated transport	BP			0.00116927			0.000372977
GO:0045087	innate immune response	BP					0.0406706	0.000395104			0.00069987
GO:0050502	cis-zeatin O-beta-D-glucosyltransferase activity	MF						0.000416569
GO:0002020	protease binding	MF			0.0185028			0.000438014
GO:0071712	ER-associated misfolded protein catabolic process	BP			0.0231938			0.000523928
GO:0032588	trans-Golgi network membrane	CC			0.00759914			0.000581406
GO:0005787	signal peptidase complex	CC						0.000617813
GO:0001666	response to hypoxia	BP			0.00197968	0.00496129		0.000663983
GO:0010162	seed dormancy process	BP				0.0266679		0.000676512
GO:0006862	nucleotide transport	BP						0.000698656			0.0480828
GO:0016881	acid-amino acid ligase activity	MF			1.88626e-07		0.0402779	0.000738639		0.0233057	0.0067774
GO:0031210	phosphatidylcholine binding	MF						0.00073899
GO:0006007	glucose catabolic process	BP			3.24905e-05	0.000814862		0.000802909		0.0425317	0.0184841
GO:0009269	response to desiccation	BP			0.0347069			0.000819567
GO:0042761	very long-chain fatty acid biosynthetic process	BP						0.000830704
GO:0033862	UMP kinase activity	MF			0.0208501			0.000836527
GO:0001135	transcription factor activity, RNA polymerase II transcription factor recruiting	MF			0.00793535			0.000838354
GO:0005743	mitochondrial inner membrane	CC						0.00088377
GO:0005484	SNAP receptor activity	MF						0.000906589
GO:0004867	serine-type endopeptidase inhibitor activity	MF			0.00116817			0.000907475			0.00145833
GO:0005615	extracellular space	CC			0.0135734		0.036255	0.000924741	0.0197782		0.000157718
GO:0010150	leaf senescence	BP			0.00790714			0.000934205
GO:0031201	SNARE complex	CC						0.000991557
GO:0080037	negative regulation of cytokinin-activated signaling pathway	BP						0.000999103
GO:0004869	cysteine-type endopeptidase inhibitor activity	MF						0.00104465
GO:0009062	fatty acid catabolic process	BP						0.00114275
GO:0010360	negative regulation of anion channel activity	BP						0.0011852
GO:0010054	trichoblast differentiation	BP						0.00125568
GO:0043269	regulation of ion transport	BP			0.0358405			0.0012643			0.013572
GO:0015996	chlorophyll catabolic process	BP						0.00131041
GO:0051289	protein homotetramerization	BP			0.00191325			0.00137402
GO:0046914	transition metal ion binding	MF						0.00139192
GO:0016567	protein ubiquitination	BP			0.000931431			0.0014484
GO:0009920	cell plate formation involved in plant-type cell wall biogenesis	BP				0.00930953		0.00145447
GO:0061575	cyclin-dependent protein serine/threonine kinase activator activity	MF						0.00148518
GO:0009694	jasmonic acid metabolic process	BP						0.00152202
GO:1904264	ubiquitin protein ligase activity involved in ERAD pathway	MF			0.0396054			0.00159642
GO:0010099	regulation of photomorphogenesis	BP			0.0470514			0.00162959
GO:0072661	protein targeting to plasma membrane	BP						0.0016426
GO:0001510	RNA methylation	BP						0.00168152
GO:0007264	small GTPase mediated signal transduction	BP						0.00168366
GO:0048448	stamen morphogenesis	BP			0.00313332			0.00173493
GO:0006465	signal peptide processing	BP			0.0202245			0.00175867
GO:0009750	response to fructose	BP			0.0040109			0.00181136
GO:0009820	alkaloid metabolic process	BP			0.0037442			0.00188614		0.00770885	0.00236094
GO:0034599	cellular response to oxidative stress	BP						0.00189717
GO:0051861	glycolipid binding	MF						0.00204319
GO:0015020	glucuronosyltransferase activity	MF			0.000135768			0.00205159			0.0156053
GO:0005784	Sec61 translocon complex	CC			0.00720744			0.00206706
GO:0003682	chromatin binding	MF						0.00208594
GO:0002181	cytoplasmic translation	BP						0.00213783
GO:0008137	NADH dehydrogenase (ubiquinone) activity	MF						0.00216483
GO:0070390	transcription export complex 2	CC						0.00220304
GO:0006749	glutathione metabolic process	BP			0.000206899			0.00223621	0.00828522	0.0242856
GO:0019344	cysteine biosynthetic process	BP						0.00225004
GO:0010029	regulation of seed germination	BP						0.0023062
GO:0031204	posttranslational protein targeting to membrane, translocation	BP			0.00451025			0.00239992
GO:0006616	SRP-dependent cotranslational protein targeting to membrane, translocation	BP			0.000585424			0.00240108
GO:0015695	organic cation transport	BP			0.0110259			0.00240559
GO:0046939	nucleotide phosphorylation	BP						0.00255678
GO:0015181	arginine transmembrane transporter activity	MF						0.00257232			0.027667
GO:0015189	L-lysine transmembrane transporter activity	MF						0.00257232			0.027667
GO:0048030	disaccharide binding	MF						0.00260998
GO:0004765	shikimate kinase activity	MF						0.0026735
GO:0003960	NADPH:quinone reductase activity	MF						0.00267878			0.0123404
GO:0019243	methylglyoxal catabolic process to D-lactate via S-lactoyl-glutathione	BP						0.00280367
GO:0045841	negative regulation of mitotic metaphase/anaphase transition	BP						0.00286822
GO:0080018	anthocyanin 5-O-glucosyltransferase activity	MF						0.00298296
GO:0048527	lateral root development	BP			0.019208		0.0102651	0.00298816
GO:0010325	raffinose family oligosaccharide biosynthetic process	BP			0.0441373			0.0029908
GO:0006083	acetate metabolic process	BP						0.0029983
GO:0036513	Derlin-1 retrotranslocation complex	CC			0.0126609			0.00310793
GO:0042542	response to hydrogen peroxide	BP			0.00829205			0.00340548
GO:0010951	negative regulation of endopeptidase activity	BP			0.00204873			0.00340661			0.00249791
GO:0070973	protein localization to endoplasmic reticulum exit site	BP						0.0034244
GO:0015819	lysine transport	BP						0.00352346
GO:0010411	xyloglucan metabolic process	BP						0.00378621
GO:0019375	galactolipid biosynthetic process	BP			0.000294774			0.00386079		0.0376005	0.0111962
GO:0047443	4-hydroxy-4-methyl-2-oxoglutarate aldolase activity	MF						0.00386365
GO:0008143	poly(A) binding	MF						0.00388987
GO:0048827	phyllome development	BP						0.00390324
GO:0006839	mitochondrial transport	BP				0.042263		0.00391453
GO:0009740	gibberellic acid mediated signaling pathway	BP						0.00395311
GO:0005737	cytoplasm	CC			0.00207711			0.00431922			0.0299389
GO:0034059	response to anoxia	BP			0.000824571		0.0174367	0.00434566		0.0120457
GO:0009845	seed germination	BP						0.00448191
GO:0005762	mitochondrial large ribosomal subunit	CC						0.00460369
GO:0009408	response to heat	BP						0.00472807
GO:0004861	cyclin-dependent protein serine/threonine kinase inhibitor activity	MF			0.04782			0.00477247
GO:0016036	cellular response to phosphate starvation	BP			2.77609e-05			0.00481226		0.0349915	0.00565438
GO:0090379	secondary cell wall biogenesis involved in seed trichome differentiation	BP						0.00484425
GO:0052731	phosphocholine phosphatase activity	MF			0.0313854			0.00490909
GO:0052732	phosphoethanolamine phosphatase activity	MF			0.0313854			0.00490909
GO:0048467	gynoecium development	BP						0.00507637
GO:0000331	contractile vacuole	CC						0.00517786
GO:0004860	protein kinase inhibitor activity	MF						0.00522578
GO:0008936	nicotinamidase activity	MF						0.0052308
GO:0015991	ATP hydrolysis coupled proton transport	BP			0.00415273		0.00741283	0.00525181		0.0176156
GO:0031625	ubiquitin protein ligase binding	MF			0.0121908			0.00526476
GO:0006474	N-terminal protein amino acid acetylation	BP			0.0423266			0.00530435
GO:0032940	secretion by cell	BP			0.0198838			0.0054443
GO:0045047	protein targeting to ER	BP						0.00544718
GO:0072657	protein localization to membrane	BP						0.00545121
GO:1903827	regulation of cellular protein localization	BP						0.00545121
GO:0047215	indole-3-acetate beta-glucosyltransferase activity	MF						0.00570692		0.0234703
GO:0008756	o-succinylbenzoate-CoA ligase activity	MF						0.00595252
GO:0019760	glucosinolate metabolic process	BP			0.0110451			0.00596503
GO:0045185	maintenance of protein location	BP						0.00600416
GO:0004842	ubiquitin-protein transferase activity	MF			7.73236e-06			0.00611848
GO:0047800	cysteamine dioxygenase activity	MF						0.00612892
GO:0005689	U12-type spliceosomal complex	CC						0.00632898
GO:0033328	peroxisome membrane targeting sequence binding	MF						0.00643507
GO:0017089	glycolipid transporter activity	MF						0.00663798
GO:0046836	glycolipid transport	BP						0.00663798
GO:0080164	regulation of nitric oxide metabolic process	BP						0.00683086
GO:0006906	vesicle fusion	BP						0.00689619
GO:0009164	nucleoside catabolic process	BP						0.00691372
GO:0019722	calcium-mediated signaling	BP			0.007397		0.0140019	0.00701342		4.74775e-05	0.0474843
GO:0009864	induced systemic resistance, jasmonic acid mediated signaling pathway	BP			0.00346497			0.00703619
GO:0009509	chromoplast	CC						0.00706062
GO:0042372	phylloquinone biosynthetic process	BP						0.00706775
GO:0043295	glutathione binding	MF			0.00256447			0.00719878
GO:0098687	chromosomal region	CC						0.00722639
GO:0010344	seed oilbody biogenesis	BP						0.00727538
GO:0055074	calcium ion homeostasis	BP						0.00735432
GO:0005732	small nucleolar ribonucleoprotein complex	CC						0.00736061
GO:0045544	gibberellin 20-oxidase activity	MF						0.00746761
GO:0016762	xyloglucan:xyloglucosyl transferase activity	MF						0.00762065
GO:0033617	mitochondrial respiratory chain complex IV assembly	BP			0.0353692			0.00768361
GO:1990726	Lsm1-7-Pat1 complex	CC			0.0190955			0.00777364
GO:0010252	auxin homeostasis	BP						0.00779709
GO:0051245	negative regulation of cellular defense response	BP			0.00737456		0.0341089	0.00781047			0.0193352
GO:0008127	quercetin 2,3-dioxygenase activity	MF			0.0429581			0.00788153			0.00957122
GO:0030224	monocyte differentiation	BP			0.0429581			0.00788153			0.00957122
GO:0072488	ammonium transmembrane transport	BP	0.000813597		0.0377608			0.00791949
GO:0006122	mitochondrial electron transport, ubiquinol to cytochrome c	BP						0.00798986
GO:0046685	response to arsenic-containing substance	BP						0.00811631
GO:0008233	peptidase activity	MF						0.00839663
GO:0016289	CoA hydrolase activity	MF			0.0040199			0.00846499
GO:0009578	etioplast stroma	CC						0.00849095
GO:0006301	postreplication repair	BP			0.0022933			0.00854544
GO:0048444	floral organ morphogenesis	BP						0.00859382
GO:0015215	nucleotide transmembrane transporter activity	MF						0.0087381
GO:0004128	cytochrome-b5 reductase activity, acting on NAD(P)H	MF						0.00893175	0.008013
GO:0005763	mitochondrial small ribosomal subunit	CC						0.0089362
GO:0006950	response to stress	BP						0.00903217			0.0272825
GO:0042110	T cell activation	BP						0.00911183
GO:0019367	fatty acid elongation, saturated fatty acid	BP						0.00916013
GO:0034625	fatty acid elongation, monounsaturated fatty acid	BP						0.00916013
GO:0034626	fatty acid elongation, polyunsaturated fatty acid	BP						0.00916013
GO:0047037	salutaridine reductase (NADPH) activity	MF			0.0227844			0.00940498		0.000199834	0.00255616
GO:0015226	carnitine transmembrane transporter activity	MF			0.0484067			0.0094382
GO:0043424	protein histidine kinase binding	MF			0.0123279	0.000155455		0.00962063		0.0129028	0.0160292
GO:0015672	monovalent inorganic cation transport	BP	0.00401392		0.0446429			0.00964898			0.00127751
GO:0047172	shikimate O-hydroxycinnamoyltransferase activity	MF						0.00966503
GO:0015992	proton transport	BP						0.00968326
GO:0035252	UDP-xylosyltransferase activity	MF						0.00978527
GO:0030125	clathrin vesicle coat	CC						0.00978781
GO:0009938	negative regulation of gibberellic acid mediated signaling pathway	BP			0.0193535	0.00740847		0.00989123
GO:0043086	negative regulation of catalytic activity	BP			0.0207831			0.00990291
GO:0047205	quinate O-hydroxycinnamoyltransferase activity	MF						0.0099407
GO:0000209	protein polyubiquitination	BP			0.0121462			0.010083
GO:0050625	2-hydroxy-1,4-benzoquinone reductase activity	MF			0.00352769			0.0101541			0.00035127
GO:0042973	glucan endo-1,3-beta-D-glucosidase activity	MF			0.0259731	0.000229084		0.0102691			0.0266803
GO:0009308	amine metabolic process	BP			0.000464458			0.01048
GO:0010233	phloem transport	BP						0.0105165
GO:0010482	regulation of epidermal cell division	BP						0.0105262
GO:0050253	retinyl-palmitate esterase activity	MF			0.00608772			0.0105506			0.000374956
GO:0006407	rRNA export from nucleus	BP						0.0106234
GO:0009710	tropane alkaloid biosynthetic process	BP						0.0108105
GO:0016272	prefoldin complex	CC						0.0108864
GO:0051128	regulation of cellular component organization	BP						0.010945
GO:0042129	regulation of T cell proliferation	BP						0.0111
GO:0051251	positive regulation of lymphocyte activation	BP						0.0111
GO:0048446	petal morphogenesis	BP						0.0111204			0.00294025
GO:0010197	polar nucleus fusion	BP					0.0352132	0.0111818		0.0185793	0.0273171
GO:0005507	copper ion binding	MF					0.00620309	0.0113652		0.00105258	0.039593
GO:0071495	cellular response to endogenous stimulus	BP						0.0115149
GO:1902626	assembly of large subunit precursor of preribosome	BP						0.0116108
GO:0001881	receptor recycling	BP						0.0118929
GO:0050356	tropine dehydrogenase activity	MF						0.0120145
GO:0035552	oxidative single-stranded DNA demethylation	BP						0.0121671
GO:0043734	DNA-N1-methyladenine dioxygenase activity	MF						0.0121671
GO:0070579	methylcytosine dioxygenase activity	MF						0.0121671
GO:0030001	metal ion transport	BP						0.0122575
GO:0010175	sphingosine transmembrane transporter activity	MF						0.0122577
GO:0004595	pantetheine-phosphate adenylyltransferase activity	MF			0.00588439	0.00895475	0.0343294	0.01231
GO:0080020	regulation of coenzyme A biosynthetic process	BP			0.00588439	0.00895475	0.0343294	0.01231
GO:0015802	basic amino acid transport	BP					0.0347892	0.012379			0.00550431
GO:0008784	alanine racemase activity	MF						0.0124702
GO:0006386	termination of RNA polymerase III transcription	BP						0.0128729
GO:0031372	UBC13-MMS2 complex	CC			0.02816			0.0129272
GO:0047036	codeinone reductase (NADPH) activity	MF			0.0295006			0.0131948			0.0406502
GO:0047939	L-glucuronate reductase activity	MF			0.0295006			0.0131948			0.0406502
GO:0050388	uronate dehydrogenase activity	MF			0.0295006			0.0131948			0.0406502
GO:0010301	xanthoxin dehydrogenase activity	MF					0.00327713	0.0134453			0.0126821
GO:0008967	phosphoglycolate phosphatase activity	MF				0.00184272		0.0138626
GO:0019365	pyridine nucleotide salvage	BP						0.0143414
GO:0030308	negative regulation of cell growth	BP						0.0144347
GO:0051087	chaperone binding	MF						0.0146383
GO:0004523	RNA-DNA hybrid ribonuclease activity	MF						0.0148086
GO:0071819	DUBm complex	CC						0.0150376
GO:0009852	auxin catabolic process	BP						0.0151622
GO:1901671	positive regulation of superoxide dismutase activity	BP						0.0152814
GO:0042803	protein homodimerization activity	MF						0.015392
GO:1990592	protein K69-linked ufmylation	BP						0.0154036
GO:0014704	intercalated disc	CC						0.0154316
GO:0080027	response to herbivore	BP			0.0319648			0.0157157		0.00835265	0.00370726
GO:0000028	ribosomal small subunit assembly	BP						0.0157792
GO:0046424	ferulate 5-hydroxylase activity	MF			0.00778098		0.041467	0.0161847
GO:0010035	response to inorganic substance	BP						0.0164084
GO:0048032	galacturonate binding	MF						0.0165482
GO:0031117	positive regulation of microtubule depolymerization	BP			0.00587431			0.0165586
GO:0048831	regulation of shoot system development	BP			0.0395664			0.0166275
GO:0015185	gamma-aminobutyric acid transmembrane transporter activity	MF			0.035422			0.0167624			0.00415815
GO:0015812	gamma-aminobutyric acid transport	BP			0.035422			0.0167624			0.00415815
GO:0015912	short-chain fatty acid transport	BP			0.035422			0.0167624			0.00415815
GO:0006457	protein folding	BP						0.0169902
GO:0009635	response to herbicide	BP						0.017042
GO:0034657	GID complex	CC						0.0171186
GO:0050291	sphingosine N-acyltransferase activity	MF						0.0171352
GO:0010299	detoxification of cobalt ion	BP			0.00833059		0.0432574	0.0173014
GO:0010312	detoxification of zinc ion	BP			0.00833059		0.0432574	0.0173014
GO:0047085	hydroxyphenylacetonitrile 2-monooxygenase activity	MF						0.0173022
GO:0050592	4-hydroxyphenylacetaldehyde oxime monooxygenase activity	MF						0.0173022
GO:0043281	regulation of cysteine-type endopeptidase activity involved in apoptotic process	BP						0.0173863
GO:0070534	protein K63-linked ubiquitination	BP						0.0174121
GO:0006833	water transport	BP			0.00730528	0.0118766		0.0174125		0.0392001
GO:0043091	L-arginine import	BP				0.045808		0.0174502
GO:0019915	lipid storage	BP				0.00581467		0.0174546
GO:0015696	ammonium transport	BP			0.0434629			0.0174627			0.0159208
GO:0018401	peptidyl-proline hydroxylation to 4-hydroxy-L-proline	BP				0.0457251		0.0177446
GO:0048738	cardiac muscle tissue development	BP						0.0183717
GO:0090610	bundle sheath cell fate specification	BP						0.0184954
GO:1903647	negative regulation of chlorophyll catabolic process	BP						0.0185067
GO:0005313	L-glutamate transmembrane transporter activity	MF						0.0186115			0.0335306
GO:0009793	embryo development ending in seed dormancy	BP						0.0188743
GO:0005750	mitochondrial respiratory chain complex III	CC						0.0190598
GO:0097526	spliceosomal tri-snRNP complex	CC			0.0373954			0.0192789
GO:0006625	protein targeting to peroxisome	BP						0.0196427
GO:0019632	shikimate metabolic process	BP						0.0196833
GO:0015075	ion transmembrane transporter activity	MF						0.0197766
GO:0051457	maintenance of protein location in nucleus	BP						0.0198336
GO:0003862	3-isopropylmalate dehydrogenase activity	MF						0.0198337
GO:0042995	cell projection	CC						0.0198521
GO:0032783	ELL-EAF complex	CC						0.0200247
GO:0004604	phosphoadenylyl-sulfate reductase (thioredoxin) activity	MF			0.00968731			0.0200471		0.0388653
GO:0009973	adenylyl-sulfate reductase activity	MF			0.00968731			0.0200471		0.0388653
GO:0019379	sulfate assimilation, phosphoadenylyl sulfate reduction by phosphoadenylyl-sulfate reductase (thioredoxin)	BP			0.00968731			0.0200471		0.0388653
GO:0033741	adenylyl-sulfate reductase (glutathione) activity	MF			0.00968731			0.0200471		0.0388653
GO:0047918	GDP-mannose 3,5-epimerase activity	MF						0.0200479
GO:0001968	fibronectin binding	MF			0.00970379			0.0200803		0.0388903
GO:0005518	collagen binding	MF			0.00970379			0.0200803		0.0388903
GO:0008201	heparin binding	MF			0.00970379			0.0200803		0.0388903
GO:0010811	positive regulation of cell-substrate adhesion	BP			0.00970379			0.0200803		0.0388903
GO:0000494	box C/D snoRNA 3'-end processing	BP						0.0201038
GO:1990258	histone glutamine methylation	BP						0.0201038
GO:1990259	histone-glutamine methyltransferase activity	MF						0.0201038
GO:0072547	tricoumaroylspermidine meta-hydroxylase activity	MF			0.00976402			0.0202019
GO:0072548	dicoumaroyl monocaffeoyl spermidine meta-hydroxylase activity	MF			0.00976402			0.0202019
GO:0072549	monocoumaroyl dicaffeoyl spermidine meta-hydroxylase activity	MF			0.00976402			0.0202019
GO:0000981	RNA polymerase II transcription factor activity, sequence-specific DNA binding	MF			0.0261028			0.020402
GO:0009722	detection of cytokinin stimulus	BP						0.0204278
GO:0071345	cellular response to cytokine stimulus	BP						0.0204278
GO:0051083	'de novo' cotranslational protein folding	BP					0.0481149	0.0204527
GO:0015718	monocarboxylic acid transport	BP						0.020632
GO:0009496	plastoquinol--plastocyanin reductase activity	MF						0.020678
GO:0010486	manganese:proton antiporter activity	MF						0.0208093
GO:2000012	regulation of auxin polar transport	BP						0.02082
GO:0090407	organophosphate biosynthetic process	BP						0.0210021
GO:0001129	RNA polymerase II transcription factor activity, TBP-class protein binding, involved in preinitiation complex assembly	MF						0.0210094
GO:0008470	isovaleryl-CoA dehydrogenase activity	MF						0.0210094
GO:0000447	endonucleolytic cleavage in ITS1 to separate SSU-rRNA from 5.8S rRNA and LSU-rRNA from tricistronic rRNA transcript (SSU-rRNA, 5.8S rRNA, LSU-rRNA)	BP						0.0212738
GO:0009061	anaerobic respiration	BP			0.000586255			0.0213034
GO:0006623	protein targeting to vacuole	BP			1.17446e-05			0.0217609
GO:0006221	pyrimidine nucleotide biosynthetic process	BP						0.0222267
GO:0022622	root system development	BP						0.0222591
GO:0031137	regulation of conjugation with cellular fusion	BP						0.0222887
GO:0006887	exocytosis	BP						0.0224914
GO:0010161	red light signaling pathway	BP						0.0225797			0.0109396
GO:0010941	regulation of cell death	BP						0.0227532
GO:0071203	WASH complex	CC						0.0227626			0.0175593
GO:0000224	peptide-N4-(N-acetyl-beta-glucosaminyl)asparagine amidase activity	MF						0.0229524
GO:0008948	oxaloacetate decarboxylase activity	MF						0.0231406
GO:0048041	focal adhesion assembly	BP						0.0231573
GO:0006355	regulation of transcription, DNA-templated	BP				0.0275116		0.0235268
GO:0080170	hydrogen peroxide transmembrane transport	BP						0.0237266
GO:0004622	lysophospholipase activity	MF						0.0238871
GO:0009401	phosphoenolpyruvate-dependent sugar phosphotransferase system	BP					0.0459454	0.0243993
GO:0043414	macromolecule methylation	BP						0.0248101
GO:0004129	cytochrome-c oxidase activity	MF						0.0248307
GO:0006986	response to unfolded protein	BP						0.024843
GO:0031463	Cul3-RING ubiquitin ligase complex	CC						0.0248441
GO:0051085	chaperone mediated protein folding requiring cofactor	BP						0.0251735
GO:0016925	protein sumoylation	BP						0.025202
GO:0044351	macropinocytosis	BP			0.0272886			0.0253006
GO:0032434	regulation of proteasomal ubiquitin-dependent protein catabolic process	BP						0.0253146
GO:0008486	diphosphoinositol-polyphosphate diphosphatase activity	MF						0.0253258
GO:0052840	inositol diphosphate tetrakisphosphate diphosphatase activity	MF						0.0253258
GO:0052843	inositol-1-diphosphate-2,3,4,5,6-pentakisphosphate diphosphatase activity	MF						0.0253258
GO:0052844	inositol-3-diphosphate-1,2,4,5,6-pentakisphosphate diphosphatase activity	MF						0.0253258
GO:0052845	inositol-5-diphosphate-1,2,3,4,6-pentakisphosphate diphosphatase activity	MF						0.0253258
GO:0052846	inositol-1,5-bisdiphosphate-2,3,4,6-tetrakisphosphate 1-diphosphatase activity	MF						0.0253258
GO:0052847	inositol-1,5-bisdiphosphate-2,3,4,6-tetrakisphosphate 5-diphosphatase activity	MF						0.0253258
GO:0052848	inositol-3,5-bisdiphosphate-2,3,4,6-tetrakisphosphate 5-diphosphatase activity	MF						0.0253258
GO:0042759	long-chain fatty acid biosynthetic process	BP						0.0256081
GO:0019774	proteasome core complex, beta-subunit complex	CC						0.0259475
GO:0070887	cellular response to chemical stimulus	BP						0.0260617
GO:0032876	negative regulation of DNA endoreduplication	BP						0.0260887
GO:0016656	monodehydroascorbate reductase (NADH) activity	MF			0.00733402			0.0262013
GO:0047254	2,4-dihydroxy-7-methoxy-2H-1,4-benzoxazin-3(4H)-one 2-D-glucosyltransferase activity	MF						0.0264131
GO:0047807	cytokinin 7-beta-glucosyltransferase activity	MF						0.0264131
GO:0080062	cytokinin 9-beta-glucosyltransferase activity	MF						0.0264131
GO:0005432	calcium:sodium antiporter activity	MF				0.0298603		0.0264232
GO:0009001	serine O-acetyltransferase activity	MF						0.0265293
GO:0044247	cellular polysaccharide catabolic process	BP						0.0265452
GO:0000036	ACP phosphopantetheine attachment site binding involved in fatty acid biosynthetic process	MF						0.0270978
GO:0045926	negative regulation of growth	BP	0.00096611		0.0307036		0.0326953	0.0272882
GO:0030490	maturation of SSU-rRNA	BP						0.0273599
GO:0009267	cellular response to starvation	BP						0.0276105
GO:0030658	transport vesicle membrane	CC						0.0276116
GO:0048278	vesicle docking	BP						0.0276367
GO:0009735	response to cytokinin	BP						0.0276626
GO:0006664	glycolipid metabolic process	BP						0.0277077			0.0180801
GO:0048367	shoot system development	BP						0.0280074
GO:0045263	proton-transporting ATP synthase complex, coupling factor F(o)	CC						0.0282627
GO:0042335	cuticle development	BP			0.0262255			0.0285897		0.041474
GO:0046786	viral replication complex formation and maintenance	BP						0.0295318
GO:0008616	queuosine biosynthetic process	BP						0.0296586
GO:0006552	leucine catabolic process	BP						0.0298347
GO:0046527	glucosyltransferase activity	MF						0.0304273			0.0217252
GO:0008198	ferrous iron binding	MF						0.0310708
GO:0006351	transcription, DNA-templated	BP						0.0314512
GO:0047134	protein-disulfide reductase activity	MF						0.0317527
GO:0000387	spliceosomal snRNP assembly	BP						0.0321025
GO:0051259	protein oligomerization	BP						0.0325479
GO:0004656	procollagen-proline 4-dioxygenase activity	MF				0.0318963		0.0326473
GO:0042788	polysomal ribosome	CC						0.0331405
GO:0009558	embryo sac cellularization	BP						0.0334578
GO:2000082	regulation of L-ascorbic acid biosynthetic process	BP			0.012452			0.0338262
GO:0050736	O-malonyltransferase activity	MF						0.0344147		0.00450657
GO:0004803	transposase activity	MF						0.0345277
GO:0007626	locomotory behavior	BP						0.0350367
GO:0002238	response to molecule of fungal origin	BP						0.0353946
GO:0047213	anthocyanidin 3-O-glucosyltransferase activity	MF					0.0198009	0.0359186
GO:0010026	trichome differentiation	BP			0.0283279		0.000824972	0.0359347
GO:0009512	cytochrome b6f complex	CC					0.0481003	0.0359815
GO:0006982	response to lipid hydroperoxide	BP						0.0360093
GO:0010335	response to non-ionic osmotic stress	BP						0.0360093
GO:0030670	phagocytic vesicle membrane	CC						0.0360383
GO:0046516	hypusine metabolic process	BP						0.0361069
GO:1901607	alpha-amino acid biosynthetic process	BP						0.0361069
GO:0015879	carnitine transport	BP			0.0134363			0.0362883
GO:0005688	U6 snRNP	CC						0.0362923
GO:0032107	regulation of response to nutrient levels	BP						0.0368205		0.0439801
GO:0090156	cellular sphingolipid homeostasis	BP			0.018402			0.0374542
GO:1900060	negative regulation of ceramide biosynthetic process	BP			0.018402			0.0374542
GO:0000305	response to oxygen radical	BP			0.0138984			0.0374576			0.0253451
GO:0000276	mitochondrial proton-transporting ATP synthase complex, coupling factor F(o)	CC						0.0375086
GO:0042936	dipeptide transporter activity	MF						0.0375208
GO:0042937	tripeptide transporter activity	MF						0.0375208
GO:0042938	dipeptide transport	BP						0.0375208
GO:0042939	tripeptide transport	BP						0.0375208
GO:0010371	regulation of gibberellin biosynthetic process	BP						0.0375514
GO:0006696	ergosterol biosynthetic process	BP						0.0376295		0.0478197	0.0460907
GO:0034715	pICln-Sm protein complex	CC						0.0379055
GO:0010262	somatic embryogenesis	BP			0.0110632			0.038232			0.0078663
GO:0008083	growth factor activity	MF						0.0389425
GO:0004320	oleoyl-[acyl-carrier-protein] hydrolase activity	MF						0.0389857
GO:0052692	raffinose alpha-galactosidase activity	MF						0.0391147
GO:0000394	RNA splicing, via endonucleolytic cleavage and ligation	BP						0.039138
GO:0000461	endonucleolytic cleavage to generate mature 3'-end of SSU-rRNA from (SSU-rRNA, 5.8S rRNA, LSU-rRNA)	BP						0.0392091
GO:0000976	transcription regulatory region sequence-specific DNA binding	MF				0.0401072		0.0393299
GO:0016776	phosphotransferase activity, phosphate group as acceptor	MF						0.0393977
GO:0042330	taxis	BP						0.0396175
GO:0008801	beta-phosphoglucomutase activity	MF			0.0196994	0.0144872		0.0400009
GO:0003955	NAD(P)H dehydrogenase (quinone) activity	MF			0.00928929		0.0418414	0.0401035			0.0229103
GO:0009826	unidimensional cell growth	BP	0.00974131					0.0401386
GO:0051287	NAD binding	MF			0.0452068	0.0279902		0.0403107
GO:0030042	actin filament depolymerization	BP						0.040385
GO:0009504	cell plate	CC						0.0407535
GO:0042245	RNA repair	BP						0.0410245
GO:0015180	L-alanine transmembrane transporter activity	MF						0.0411127			0.00166738
GO:0015808	L-alanine transport	BP						0.0411127			0.00166738
GO:0004140	dephospho-CoA kinase activity	MF				0.0331224		0.0412381
GO:0018858	benzoate-CoA ligase activity	MF						0.0413148
GO:0006972	hyperosmotic response	BP			0.00159812	0.00850984		0.0415939		0.00552873
GO:0015698	inorganic anion transport	BP	0.0047244					0.0417263			0.00212862
GO:0048657	anther wall tapetum cell differentiation	BP						0.0421317
GO:0004449	isocitrate dehydrogenase (NAD+) activity	MF						0.0421725
GO:0019838	growth factor binding	MF			0.0209665			0.0425171
GO:0000210	NAD+ diphosphatase activity	MF						0.0428886
GO:0019135	deoxyhypusine monooxygenase activity	MF						0.0430596
GO:0005754	mitochondrial proton-transporting ATP synthase, catalytic core	CC						0.0430809
GO:0010276	phytol kinase activity	MF						0.0435075
GO:0052669	CTP:2-trans,-6-trans-farnesol kinase activity	MF						0.0435075
GO:0052670	geraniol kinase activity	MF						0.0435075
GO:0052671	geranylgeraniol kinase activity	MF						0.0435075
GO:0046483	heterocycle metabolic process	BP						0.0437483
GO:0006769	nicotinamide metabolic process	BP						0.04417
GO:0015711	organic anion transport	BP						0.0444695
GO:0006412	translation	BP						0.0446497
GO:0010331	gibberellin binding	MF						0.0449593
GO:0060048	cardiac muscle contraction	BP						0.045108
GO:0005777	peroxisome	CC				0.0124522		0.0451655
GO:0044550	secondary metabolite biosynthetic process	BP						0.0455726
GO:0046982	protein heterodimerization activity	MF						0.0456821
GO:0008157	protein phosphatase 1 binding	MF						0.0457846
GO:0032515	negative regulation of phosphoprotein phosphatase activity	BP						0.0457846
GO:0016671	oxidoreductase activity, acting on a sulfur group of donors, disulfide as acceptor	MF				0.012321		0.0458752
GO:0008519	ammonium transmembrane transporter activity	MF						0.0459434
GO:0005337	nucleoside transmembrane transporter activity	MF						0.0459756
GO:0009060	aerobic respiration	BP						0.0465314
GO:0006189	'de novo' IMP biosynthetic process	BP						0.0466924
GO:0042964	thioredoxin biosynthetic process	BP			0.0231798	0.0157489		0.0467877
GO:0071806	protein transmembrane transport	BP						0.047079
GO:0009856	pollination	BP				0.0350259		0.0471948
GO:0019370	leukotriene biosynthetic process	BP			0.0234127			0.0472396
GO:0048646	anatomical structure formation involved in morphogenesis	BP				0.00942199		0.047447
GO:0010132	dhurrin biosynthetic process	BP						0.0474592
GO:0031307	integral component of mitochondrial outer membrane	CC						0.0475409
GO:0032580	Golgi cisterna membrane	CC						0.0476884
GO:0009098	leucine biosynthetic process	BP						0.0480082
GO:0031155	regulation of reproductive fruiting body development	BP						0.0480223
GO:0031386	protein tag	MF						0.048075
GO:0016311	dephosphorylation	BP						0.0484755			0.0071772
GO:0030139	endocytic vesicle	CC			0.0218079			0.0485487
GO:0019064	fusion of virus membrane with host plasma membrane	BP						0.0496171
GO:1903086	negative regulation of sinapate ester biosynthetic process	BP			0.0247173			0.049766
GO:0016161	beta-amylase activity	MF						0.0498591
GO:0008794	arsenate reductase (glutaredoxin) activity	MF						0.0498765
GO:0005674	transcription factor TFIIF complex	CC						0.0499866
GO:0009913	epidermal cell differentiation	BP					0.0180691		0.0366908
GO:0009664	plant-type cell wall organization	BP	0.0154017
GO:0006096	glycolytic process	BP			0.000887474	0.0391375
GO:0006740	NADPH regeneration	BP			0.0242896	0.0235574
GO:0009926	auxin polar transport	BP				0.00568204			0.0173221
GO:0009734	auxin-activated signaling pathway	BP				0.0121841			0.0483256
GO:0019761	glucosinolate biosynthetic process	BP			0.0131404					0.0109539
GO:0008361	regulation of cell size	BP				0.00789632
GO:0005618	cell wall	CC				0.00115147	0.0475337
GO:0009640	photomorphogenesis	BP				0.0134032
GO:0044723	single-organism carbohydrate metabolic process	BP					0.0151489
GO:0009749	response to glucose	BP			0.00289226
GO:0006546	glycine catabolic process	BP					0.0345101
GO:0044702	single organism reproductive process	BP			0.0302118
GO:0009106	lipoate metabolic process	BP					0.0244693
GO:0009266	response to temperature stimulus	BP				0.0411464				0.0147561
GO:0006468	protein phosphorylation	BP									1.26777e-08
GO:0006635	fatty acid beta-oxidation	BP			0.00121867					0.029114
GO:0006569	tryptophan catabolic process	BP			0.00965899
GO:0006914	autophagy	BP			0.0374002					0.0493456
GO:0006338	chromatin remodeling	BP							0.00213387
GO:0007062	sister chromatid cohesion	BP							0.0188243
GO:0009072	aromatic amino acid family metabolic process	BP			0.0244855		0.0198794
GO:0046164	alcohol catabolic process	BP			0.00108703	0.00111772
GO:0010043	response to zinc ion	BP	0.00665158							0.032585
GO:0016042	lipid catabolic process	BP			0.0432248
GO:0016363	nuclear matrix	CC			0.00190973
GO:0003333	amino acid transmembrane transport	BP			0.00459658
GO:0048765	root hair cell differentiation	BP							0.0143163
GO:0048366	leaf development	BP					0.00227514
GO:0009933	meristem structural organization	BP				0.0260684
GO:0048589	developmental growth	BP								0.0237299
GO:0051538	3 iron, 4 sulfur cluster binding	MF			0.00932712		3.54524e-06			0.00419586	0.000977538
GO:0005887	integral component of plasma membrane	CC	0.0151998								0.005328
GO:0009309	amine biosynthetic process	BP			0.0358282
GO:0051707	response to other organism	BP				0.0443307
GO:0022804	active transmembrane transporter activity	MF			0.0202289
GO:0016558	protein import into peroxisome matrix	BP			0.0146269
GO:0051258	protein polymerization	BP	0.00203337
GO:0080022	primary root development	BP							0.0476091
GO:0008425	2-polyprenyl-6-methoxy-1,4-benzoquinone methyltransferase activity	MF							0.0142763
GO:0006097	glyoxylate cycle	BP								0.0442157
GO:0040008	regulation of growth	BP					0.0140529			0.00601832
GO:0034605	cellular response to heat	BP			0.0294047
GO:0005275	amine transmembrane transporter activity	MF			0.00971068						0.0365546
GO:0005669	transcription factor TFIID complex	CC								0.0243096
GO:0097054	L-glutamate biosynthetic process	BP			0.0284451		2.6124e-05			0.00142922	0.00619356
GO:0007623	circadian rhythm	BP			0.0283584
GO:0015837	amine transport	BP			0.00150445						0.00272522
GO:0031301	integral component of organelle membrane	CC							0.0483617
GO:0046961	proton-transporting ATPase activity, rotational mechanism	MF							0.0317849
GO:0010193	response to ozone	BP			0.0151018
GO:0006513	protein monoubiquitination	BP			0.0459255
GO:0010260	animal organ senescence	BP			0.00382313
GO:0048443	stamen development	BP					0.0418744
GO:0004601	peroxidase activity	MF	0.0131294
GO:0043966	histone H3 acetylation	BP								0.0142822
GO:0006333	chromatin assembly or disassembly	BP			0.00686466
GO:0007178	transmembrane receptor protein serine/threonine kinase signaling pathway	BP				0.0038437
GO:0019321	pentose metabolic process	BP			0.00158796
GO:0010329	auxin efflux transmembrane transporter activity	MF				0.0196535			0.0418228
GO:0000303	response to superoxide	BP							0.00258328	0.000493865	0.0330108
GO:0051327	meiotic M phase	BP							0.0326586
GO:0008810	cellulase activity	MF									0.0470252
GO:0010179	IAA-Ala conjugate hydrolase activity	MF			8.95589e-05
GO:0015813	L-glutamate transport	BP									0.0377239
GO:0006282	regulation of DNA repair	BP							0.0151442
GO:0010492	maintenance of shoot apical meristem identity	BP							0.030648
GO:0089701	U2AF	CC			0.00814513
GO:0000151	ubiquitin ligase complex	CC			0.0187257		0.00500928			0.0369767	0.00458844
GO:0006817	phosphate ion transport	BP			0.000122108
GO:0006486	protein glycosylation	BP					0.00113055				0.00920792
GO:0010315	auxin efflux	BP				0.026909			0.00105594
GO:0009970	cellular response to sulfate starvation	BP			0.00163562					0.00119917	0.0214282
GO:0015843	methylammonium transport	BP	0.000152575
GO:0098869	cellular oxidant detoxification	BP	0.0153513		0.0356856						0.0187354
GO:0001102	RNA polymerase II activating transcription factor binding	MF			0.0157012					0.000175445
GO:0010037	response to carbon dioxide	BP			0.0454878	0.00019171
GO:0051539	4 iron, 4 sulfur cluster binding	MF					0.0332076			0.00344813
GO:0048250	mitochondrial iron ion transport	BP					0.0353467			0.000215151
GO:0048488	synaptic vesicle endocytosis	BP				0.0032513
GO:0006949	syncytium formation	BP				0.0109299
GO:0006874	cellular calcium ion homeostasis	BP							0.01703
GO:0035556	intracellular signal transduction	BP			0.0375728		0.0289646			0.00702772	0.000243704
GO:0015398	high-affinity secondary active ammonium transmembrane transporter activity	MF	0.000254285
GO:0071215	cellular response to abscisic acid stimulus	BP			0.00043045					0.0465935
GO:0005740	mitochondrial envelope	CC			0.0171025	0.000285513
GO:0051504	diterpene phytoalexin precursor biosynthetic process pathway	BP							0.0115966
GO:0042274	ribosomal small subunit biogenesis	BP							0.0259251
GO:0010050	vegetative phase change	BP								0.0186183
GO:0004161	dimethylallyltranstransferase activity	MF					0.0213136
GO:0019676	ammonia assimilation cycle	BP					0.000341646			0.00595517	0.0264973
GO:0006102	isocitrate metabolic process	BP			0.0237918
GO:0047044	androstan-3-alpha,17-beta-diol dehydrogenase activity	MF							0.00807072
GO:0004623	phospholipase A2 activity	MF				0.00793406
GO:0005987	sucrose catabolic process	BP							0.0151205		0.000390793
GO:0042724	thiamine-containing compound biosynthetic process	BP								0.0449687
GO:0015101	organic cation transmembrane transporter activity	MF	0.00040684								0.0446922
GO:0045309	protein phosphorylated amino acid binding	MF				0.0471123
GO:0006346	methylation-dependent chromatin silencing	BP				0.0169862
GO:0004126	cytidine deaminase activity	MF				0.0262558
GO:0009972	cytidine deamination	BP				0.0262558
GO:0015804	neutral amino acid transport	BP			0.00474812						0.0174522
GO:0000266	mitochondrial fission	BP				0.00045225
GO:0016040	glutamate synthase (NADH) activity	MF			0.0101646		0.000905314			0.000483478	0.00212999
GO:0043433	negative regulation of sequence-specific DNA binding transcription factor activity	BP					0.0332987
GO:0015031	protein transport	BP			0.0351617
GO:0051049	regulation of transport	BP				0.00733193
GO:0015937	coenzyme A biosynthetic process	BP									0.0325743
GO:0034220	ion transmembrane transport	BP								0.0340554
GO:0005983	starch catabolic process	BP							0.0201068
GO:0018685	alkane 1-monooxygenase activity	MF			0.000592002						0.00210815
GO:0004806	triglyceride lipase activity	MF									0.000764599
GO:0000124	SAGA complex	CC								0.0121977
GO:0008886	glyceraldehyde-3-phosphate dehydrogenase (NADP+) (non-phosphorylating) activity	MF				0.0407203
GO:0008509	anion transmembrane transporter activity	MF	0.000661073
GO:0071281	cellular response to iron ion	BP								0.0419203
GO:0009051	pentose-phosphate shunt, oxidative branch	BP			0.0235393	0.000701157					0.0354631
GO:0051123	RNA polymerase II transcriptional preinitiation complex assembly	BP								0.000708282
GO:0004801	sedoheptulose-7-phosphate:D-glyceraldehyde-3-phosphate glyceronetransferase activity	MF			0.0388009
GO:0030317	flagellated sperm motility	BP			0.000752939
GO:0015175	neutral amino acid transmembrane transporter activity	MF			0.00239409						0.0118823
GO:0030975	thiamine binding	MF								0.0499561
GO:0010476	gibberellin mediated signaling pathway	BP			0.00516435						0.0462601
GO:0046475	glycerophospholipid catabolic process	BP			0.00093715
GO:0047395	glycerophosphoinositol glycerophosphodiesterase activity	MF			0.00093715
GO:0007140	male meiosis	BP							0.000945403
GO:0047372	acylglycerol lipase activity	MF			0.000967238
GO:0010555	response to mannitol	BP			0.0137524					0.0163475
GO:0045140	inositol phosphoceramide synthase activity	MF			0.000978303	0.0331429					0.00140946
GO:0019779	Atg8 activating enzyme activity	MF			0.000994358
GO:0009955	adaxial/abaxial pattern specification	BP							0.0339078
GO:0019305	dTDP-rhamnose biosynthetic process	BP					0.00861227				0.0269773
GO:0017005	3'-tyrosyl-DNA phosphodiesterase activity	MF				0.0213779
GO:0030276	clathrin binding	MF				0.0366072
GO:0004337	geranyltranstransferase activity	MF					0.0136891
GO:0045337	farnesyl diphosphate biosynthetic process	BP					0.0136891
GO:0018024	histone-lysine N-methyltransferase activity	MF				0.0426108
GO:0050518	2-C-methyl-D-erythritol 4-phosphate cytidylyltransferase activity	MF			0.00119058						0.026901
GO:0030643	cellular phosphate ion homeostasis	BP			0.0203123
GO:0001164	RNA polymerase I CORE element sequence-specific DNA binding	MF							0.00123031
GO:0001187	transcription factor activity, RNA polymerase I CORE element binding transcription factor recruiting	MF							0.00123031
GO:0005668	RNA polymerase transcription factor SL1 complex	CC							0.00123031
GO:0005992	trehalose biosynthetic process	BP									0.0330148
GO:0022890	inorganic cation transmembrane transporter activity	MF	0.0012711
GO:0010104	regulation of ethylene-activated signaling pathway	BP								0.00421664
GO:0016747	transferase activity, transferring acyl groups other than amino-acyl groups	MF				0.0155111
GO:0010438	cellular response to sulfur starvation	BP			0.00134726
GO:0031048	chromatin silencing by small RNA	BP				0.0456831
GO:0045486	naringenin 3-dioxygenase activity	MF			0.0142274
GO:0045324	late endosome to vacuole transport	BP									0.0443776
GO:0010115	regulation of abscisic acid biosynthetic process	BP					0.00269803				0.0155192
GO:0009225	nucleotide-sugar metabolic process	BP				0.0218477
GO:0005775	vacuolar lumen	CC			0.0247067						0.00154424
GO:0048306	calcium-dependent protein binding	MF									0.0242636
GO:0015137	citrate transmembrane transporter activity	MF								0.0431447
GO:0015746	citrate transport	BP								0.0431447
GO:0017025	TBP-class protein binding	MF								0.02432
GO:0042221	response to chemical	BP			0.0159397		0.0105794			0.00798399	0.00163516
GO:0033384	geranyl diphosphate biosynthetic process	BP					0.0105228
GO:0009833	plant-type primary cell wall biogenesis	BP					0.0352874			0.0016806
GO:0031314	extrinsic component of mitochondrial inner membrane	CC							0.026841
GO:0009067	aspartate family amino acid biosynthetic process	BP			0.00169923
GO:0006650	glycerophospholipid metabolic process	BP				0.00175483
GO:0010602	regulation of 1-aminocyclopropane-1-carboxylate metabolic process	BP					0.0455453			0.0376594
GO:1990822	basic amino acid transmembrane transport	BP			0.0425528
GO:0005779	integral component of peroxisomal membrane	CC			0.00180088
GO:0010118	stomatal movement	BP				0.0316826				0.00943168
GO:0009607	response to biotic stimulus	BP								0.038322	0.0124518
GO:0032456	endocytic recycling	BP			0.0448359
GO:0033499	galactose catabolic process via UDP-galactose	BP									0.0390801
GO:0008460	dTDP-glucose 4,6-dehydratase activity	MF					0.0295264				0.0123313
GO:0048700	acquisition of desiccation tolerance in seed	BP								0.0423539
GO:0006882	cellular zinc ion homeostasis	BP					0.00198875
GO:0009828	plant-type cell wall loosening	BP				0.00201899
GO:0048236	plant-type sporogenesis	BP							0.00204802
GO:0052716	hydroquinone:oxygen oxidoreductase activity	MF									0.0114723
GO:0019786	Atg8-specific protease activity	MF			0.00216329						0.031765
GO:0001189	RNA polymerase I transcriptional preinitiation complex assembly at the promoter for the nuclear large rRNA transcript	BP							0.00220009
GO:0042138	meiotic DNA double-strand break formation	BP							0.00536073
GO:0000212	meiotic spindle organization	BP							0.00222321
GO:0031902	late endosome membrane	CC			0.0171244
GO:0015916	fatty-acyl-CoA transport	BP								0.00234804	0.0111935
GO:0015809	arginine transport	BP			0.0112371						0.0266335
GO:0009413	response to flooding	BP				0.0354459
GO:0014071	response to cycloalkane	BP			0.00240739
GO:0016559	peroxisome fission	BP				0.00250965
GO:0015174	basic amino acid transmembrane transporter activity	MF			0.00254869
GO:0008375	acetylglucosaminyltransferase activity	MF			0.0155396						0.00275452
GO:0034553	mitochondrial respiratory chain complex II assembly	BP							0.00261043
GO:0030176	integral component of endoplasmic reticulum membrane	CC			0.00265682
GO:0060359	response to ammonium ion	BP			0.0236712		0.0123065			0.00783364	0.00266678
GO:0051266	sirohydrochlorin ferrochelatase activity	MF			0.00360513						0.0116089
GO:0032012	regulation of ARF protein signal transduction	BP					0.0315682			0.00278526
GO:0004506	squalene monooxygenase activity	MF			0.00319422
GO:0070860	RNA polymerase I core factor complex	CC							0.00323102
GO:0004556	alpha-amylase activity	MF							0.0120146		0.0119773
GO:0008395	steroid hydroxylase activity	MF					0.00625369			0.0394424	0.0331406
GO:0000056	ribosomal small subunit export from nucleus	BP			0.0359533		0.0153889
GO:0045747	positive regulation of Notch signaling pathway	BP					0.0103276
GO:0006356	regulation of transcription from RNA polymerase I promoter	BP							0.00344155
GO:0015172	acidic amino acid transmembrane transporter activity	MF			0.00383132						0.00683509
GO:0017111	nucleoside-triphosphatase activity	MF								0.00345566	0.00675449
GO:0032147	activation of protein kinase activity	BP									0.0324184
GO:0015671	oxygen transport	BP			0.0187371	0.0365933
GO:0030096	plasma membrane-derived thylakoid photosystem II	CC								0.0444541
GO:0033110	Cvt vesicle membrane	CC			0.00365458
GO:2000779	regulation of double-strand break repair	BP					0.00367464
GO:0051879	Hsp90 protein binding	MF			0.0268664
GO:0007291	sperm individualization	BP			0.0161685
GO:0006567	threonine catabolic process	BP			0.0368945
GO:0055069	zinc ion homeostasis	BP								0.00375736
GO:0004061	arylformamidase activity	MF			0.00388414						0.0110871
GO:0019441	tryptophan catabolic process to kynurenine	BP			0.00388414						0.0110871
GO:0008308	voltage-gated anion channel activity	MF					0.0272604			0.016099
GO:0010112	regulation of systemic acquired resistance	BP			0.0320597		0.035773			0.0249503	0.0180596
GO:0042439	ethanolamine-containing compound metabolic process	BP									0.0318385
GO:0051026	chiasma assembly	BP							0.0237186
GO:0016192	vesicle-mediated transport	BP				0.0251798
GO:0090355	positive regulation of auxin metabolic process	BP			0.0364645
GO:0090358	positive regulation of tryptophan metabolic process	BP			0.0364645
GO:0019776	Atg8 ligase activity	MF			0.0136652
GO:0047150	betaine-homocysteine S-methyltransferase activity	MF					0.0426883			0.0351503
GO:0004553	hydrolase activity, hydrolyzing O-glycosyl compounds	MF					0.00472099
GO:0016328	lateral plasma membrane	CC				0.00434537
GO:0006085	acetyl-CoA biosynthetic process	BP			0.0202365
GO:0071171	site-specific DNA replication termination at RTS1 barrier	BP				0.0043753
GO:1902979	mitotic DNA replication termination	BP				0.0043753
GO:0006971	hypotonic response	BP				0.00437803
GO:0004029	aldehyde dehydrogenase (NAD) activity	MF			0.0408831
GO:0004090	carbonyl reductase (NADPH) activity	MF							0.00446038
GO:2000693	positive regulation of seed maturation	BP			0.00679634	0.0265583	0.00446674
GO:0045292	mRNA cis splicing, via spliceosome	BP					0.0335115
GO:0010599	production of lsiRNA involved in RNA interference	BP							0.00450989
GO:0072546	ER membrane protein complex	CC			0.0267571
GO:0019432	triglyceride biosynthetic process	BP				0.0115189
GO:0004016	adenylate cyclase activity	MF									0.0048096
GO:0080186	developmental vegetative growth	BP			0.0474867
GO:0002229	defense response to oomycetes	BP				0.00551885	0.0102647
GO:0000097	sulfur amino acid biosynthetic process	BP			0.00501922						0.0445538
GO:0033481	galacturonate biosynthetic process	BP				0.00503832
GO:0005945	6-phosphofructokinase complex	CC								0.0241961	0.0145655
GO:0009156	ribonucleoside monophosphate biosynthetic process	BP							0.00526035
GO:0016553	base conversion or substitution editing	BP				0.00535982
GO:0043489	RNA stabilization	BP				0.00535982
GO:0009939	positive regulation of gibberellic acid mediated signaling pathway	BP			0.0212288
GO:0050661	NADP binding	MF				0.0273645
GO:0009808	lignin metabolic process	BP			0.00983023
GO:0009925	basal plasma membrane	CC				0.0418065
GO:0080025	phosphatidylinositol-3,5-bisphosphate binding	MF			0.00568178
GO:0050378	UDP-glucuronate 4-epimerase activity	MF				0.0402634
GO:0004707	MAP kinase activity	MF			0.0374416						0.0277315
GO:0004851	uroporphyrin-III C-methyltransferase activity	MF			0.0266566						0.00578498
GO:0043115	precorrin-2 dehydrogenase activity	MF			0.0266566						0.00578498
GO:0000103	sulfate assimilation	BP			0.0346918					0.0266979	0.0191615
GO:0051238	sequestering of metal ion	BP			0.0268752						0.0058348
GO:1900037	regulation of cellular response to hypoxia	BP				0.030213
GO:0046870	cadmium ion binding	MF			0.00593557
GO:0004781	sulfate adenylyltransferase (ATP) activity	MF			0.048928					0.0124082	0.00596955
GO:0046967	cytosol to ER transport	BP				0.00599709
GO:0010618	aerenchyma formation	BP									0.0202483
GO:0046330	positive regulation of JNK cascade	BP				0.00606574
GO:1900458	negative regulation of brassinosteroid mediated signaling pathway	BP				0.0171073
GO:0006783	heme biosynthetic process	BP							0.0333668
GO:0019354	siroheme biosynthetic process	BP			0.00819814						0.0185365
GO:0007035	vacuolar acidification	BP							0.00698035
GO:0004749	ribose phosphate diphosphokinase activity	MF							0.00620985
GO:0047634	agmatine N4-coumaroyltransferase activity	MF			0.0190379					0.0381156	0.0360995
GO:0042171	lysophosphatidic acid acyltransferase activity	MF				0.00623875	0.0275612			0.0220055	0.0461672
GO:0055091	phospholipid homeostasis	BP				0.00623875	0.0275612			0.0220055	0.0461672
GO:0070328	triglyceride homeostasis	BP				0.00623875	0.0275612			0.0220055	0.0461672
GO:0005344	oxygen transporter activity	MF			0.0062408	0.00948698
GO:0016720	delta12-fatty acid dehydrogenase activity	MF			0.00899847
GO:0046423	allene-oxide cyclase activity	MF			0.00632458
GO:0010098	suspensor development	BP					0.00958439			0.00632492
GO:0004089	carbonate dehydratase activity	MF			0.0364236
GO:0010589	leaf proximal/distal pattern formation	BP							0.0179672
GO:0008892	guanine deaminase activity	MF				0.018231
GO:0090342	regulation of cell aging	BP							0.00691777
GO:0040034	regulation of development, heterochronic	BP							0.00697362
GO:0006792	regulation of sulfur utilization	BP			0.00736175
GO:0048640	negative regulation of developmental growth	BP			0.00710871
GO:0051129	negative regulation of cellular component organization	BP			0.00710871
GO:0072708	response to sorbitol	BP			0.00710871
GO:2000033	regulation of seed dormancy process	BP				0.00732765
GO:0048281	inflorescence morphogenesis	BP					0.0350983
GO:0019244	lactate biosynthetic process from pyruvate	BP			0.00740143
GO:0004602	glutathione peroxidase activity	MF			0.0183557		0.0075685
GO:1990221	L-cysteine desulfurase complex	CC			0.0446397
GO:0003950	NAD+ ADP-ribosyltransferase activity	MF				0.0158195
GO:0090404	pollen tube tip	CC									0.0355252
GO:0046861	glyoxysomal membrane	CC								0.0152951
GO:0008202	steroid metabolic process	BP			0.00780234
GO:0034051	negative regulation of plant-type hypersensitive response	BP					0.0111723				0.0353174
GO:0017176	phosphatidylinositol N-acetylglucosaminyltransferase activity	MF				0.0456859
GO:0070814	hydrogen sulfide biosynthetic process	BP								0.00806497	0.0365412
GO:0012506	vesicle membrane	CC				0.0450499
GO:0009755	hormone-mediated signaling pathway	BP									0.00820327
GO:0032541	cortical endoplasmic reticulum	CC			0.00852707
GO:0048863	stem cell differentiation	BP					0.00860303				0.0444443
GO:0005513	detection of calcium ion	BP								0.0135267
GO:0005504	fatty acid binding	MF									0.0184405
GO:0051668	localization within membrane	BP							0.00865642
GO:0070919	production of siRNA involved in chromatin silencing by small RNA	BP			0.0257296
GO:0010304	PSII associated light-harvesting complex II catabolic process	BP									0.0356959
GO:0047517	1,4-beta-D-xylan synthase activity	MF			0.00914282		0.0448664			0.0369337
GO:0004791	thioredoxin-disulfide reductase activity	MF				0.0227434
GO:0009544	chloroplast ATP synthase complex	CC								0.0450605
GO:0032324	molybdopterin cofactor biosynthetic process	BP								0.0407917
GO:0071577	zinc II ion transmembrane transport	BP			0.00930219		0.0383011			0.0229934	0.0490768
GO:0047974	guanosine deaminase activity	MF				0.0093449
GO:0030512	negative regulation of transforming growth factor beta receptor signaling pathway	BP				0.0432957
GO:0035198	miRNA binding	MF							0.0221396
GO:0035197	siRNA binding	MF							0.0226098
GO:0008506	sucrose:proton symporter activity	MF									0.0350989
GO:0046537	2,3-bisphosphoglycerate-independent phosphoglycerate mutase activity	MF				0.0191434
GO:1990841	promoter-specific chromatin binding	MF			0.0489162	0.022747					0.0109955
GO:0071280	cellular response to copper ion	BP			0.0405331
GO:0048812	neuron projection morphogenesis	BP				0.0118984
GO:0017059	serine C-palmitoyltransferase complex	CC			0.0131966						0.0244448
GO:0010133	proline catabolic process to glutamate	BP			0.0100064
GO:0005761	mitochondrial ribosome	CC				0.0100762
GO:0098796	membrane protein complex	CC					0.0101127
GO:0016717	oxidoreductase activity, acting on paired donors, with oxidation of a pair of donors resulting in the reduction of molecular oxygen to two molecules of water	MF			0.0267995
GO:0005635	nuclear envelope	CC								0.0470123
GO:0008177	succinate dehydrogenase (ubiquinone) activity	MF							0.0102922
GO:0031966	mitochondrial membrane	CC									0.0103666
GO:0009399	nitrogen fixation	BP			0.01587						0.0103959
GO:0031668	cellular response to extracellular stimulus	BP			0.010402
GO:0010440	stomatal lineage progression	BP									0.0483795
GO:0031219	levanase activity	MF				0.0465691	0.0154538			0.0106227
GO:0051670	inulinase activity	MF				0.0465691	0.0154538			0.0106227
GO:0071836	nectar secretion	BP				0.0465691	0.0154538			0.0106227
GO:0034450	ubiquitin-ubiquitin ligase activity	MF								0.0108702
GO:0060041	retina development in camera-type eye	BP							0.0109502
GO:0070483	detection of hypoxia	BP				0.0110014
GO:0090353	polygalacturonase inhibitor activity	MF			0.0405621
GO:0008883	glutamyl-tRNA reductase activity	MF				0.0316594
GO:0006121	mitochondrial electron transport, succinate to ubiquinone	BP							0.0110607
GO:0055089	fatty acid homeostasis	BP				0.034717
GO:0015800	acidic amino acid transport	BP			0.0332485						0.0254357
GO:0007096	regulation of exit from mitosis	BP									0.0111731
GO:0008685	2-C-methyl-D-erythritol 2,4-cyclodiphosphate synthase activity	MF			0.0139496
GO:0071218	cellular response to misfolded protein	BP			0.0324575
GO:0045947	negative regulation of translational initiation	BP								0.0409091
GO:0003934	GTP cyclohydrolase I activity	MF				0.011686
GO:0033881	bile-acid-CoA hydrolase activity	MF									0.0116874
GO:0050306	sucrose 1F-fructosyltransferase activity	MF									0.0116874
GO:0019789	SUMO transferase activity	MF								0.0118364
GO:0044242	cellular lipid catabolic process	BP			0.0353275
GO:0010016	shoot system morphogenesis	BP								0.017542
GO:2000031	regulation of salicylic acid mediated signaling pathway	BP				0.0457161
GO:0080026	response to indolebutyric acid	BP			0.0119679
GO:0098719	sodium ion import across plasma membrane	BP									0.0120079
GO:0000792	heterochromatin	CC				0.0247237					0.0120079
GO:0010290	chlorophyll catabolite transmembrane transporter activity	MF									0.0120079
GO:0015431	glutathione S-conjugate-exporting ATPase activity	MF									0.0120079
GO:0008517	folic acid transporter activity	MF									0.0120079
GO:0071461	cellular response to redox state	BP				0.0339031
GO:0071472	cellular response to salt stress	BP			0.0286733
GO:0046898	response to cycloheximide	BP			0.0122745
GO:0004030	aldehyde dehydrogenase [NAD(P)+] activity	MF			0.0153946
GO:0080185	effector dependent induction by symbiont of host immune response	BP				0.0124066
GO:1901149	salicylic acid binding	MF				0.0124066
GO:0000113	nucleotide-excision repair factor 4 complex	CC				0.0124164
GO:0003979	UDP-glucose 6-dehydrogenase activity	MF				0.0186065
GO:0033180	proton-transporting V-type ATPase, V1 domain	CC					0.033147
GO:0016799	hydrolase activity, hydrolyzing N-glycosyl compounds	MF							0.0130045
GO:0045038	protein import into chloroplast thylakoid membrane	BP							0.0132002
GO:0042972	licheninase activity	MF			0.0174992
GO:0009236	cobalamin biosynthetic process	BP			0.0176997						0.0290066
GO:0001887	selenium compound metabolic process	BP								0.013545
GO:0006304	DNA modification	BP							0.0136199
GO:0009528	plastid inner membrane	CC					0.0137342				0.0447585
GO:0010204	defense response signaling pathway, resistance gene-independent	BP					0.0140227
GO:0000221	vacuolar proton-transporting V-type ATPase, V1 domain	CC							0.0141287
GO:0048240	sperm capacitation	BP								0.0144376
GO:0000746	conjugation	BP			0.0144939
GO:0033926	glycopeptide alpha-N-acetylgalactosaminidase activity	MF									0.0149114
GO:0008160	protein tyrosine phosphatase activator activity	MF					0.01827			0.0150379
GO:0030472	mitotic spindle organization in nucleus	BP					0.01827			0.0150379
GO:0006002	fructose 6-phosphate metabolic process	BP							0.0290127	0.0180161	0.0348461
GO:0006747	FAD biosynthetic process	BP				0.0154137
GO:0000421	autophagosome membrane	CC			0.0157614
GO:0043067	regulation of programmed cell death	BP									0.0157856
GO:0047617	acyl-CoA hydrolase activity	MF			0.0160428
GO:0008422	beta-glucosidase activity	MF					0.0315558
GO:0042343	indole glucosinolate metabolic process	BP								0.0165047	0.039832
GO:0008553	hydrogen-exporting ATPase activity, phosphorylative mechanism	MF					0.02793			0.0165425
GO:0051205	protein insertion into membrane	BP							0.0165463
GO:0047196	long-chain-alcohol O-fatty-acyltransferase activity	MF			0.0166039
GO:0004715	non-membrane spanning protein tyrosine kinase activity	MF								0.0166085
GO:0048040	UDP-glucuronate decarboxylase activity	MF					0.0341107
GO:0001764	neuron migration	BP			0.0166857
GO:0052873	FMN reductase (NADPH) activity	MF					0.0469507
GO:0042389	omega-3 fatty acid desaturase activity	MF			0.0497421
GO:0006878	cellular copper ion homeostasis	BP					0.0353996
GO:0006613	cotranslational protein targeting to membrane	BP			0.044257
GO:0047672	anthranilate N-benzoyltransferase activity	MF					0.0208049			0.0171033	0.0410277
GO:0033186	CAF-1 complex	CC					0.0173078
GO:0051591	response to cAMP	BP			0.0401326
GO:0019500	cyanide catabolic process	BP					0.0217411			0.0178661	0.0424489
GO:0050017	L-3-cyanoalanine synthase activity	MF					0.0217411			0.0178661	0.0424489
GO:0015169	glycerol-3-phosphate transmembrane transporter activity	MF				0.0179011
GO:0015791	polyol transport	BP				0.0179011
GO:0015794	glycerol-3-phosphate transport	BP				0.0179011
GO:0006777	Mo-molybdopterin cofactor biosynthetic process	BP								0.0394278
GO:0009813	flavonoid biosynthetic process	BP			0.0181267
GO:0048307	ferredoxin-nitrite reductase activity	MF				0.0181349
GO:0051119	sugar transmembrane transporter activity	MF					0.0480872		0.0181896
GO:0071423	malate transmembrane transport	BP					0.0297846
GO:0016139	glycoside catabolic process	BP							0.0243948		0.0183964
GO:1903046	meiotic cell cycle process	BP				0.0184784
GO:0006672	ceramide metabolic process	BP			0.0205495
GO:2000122	negative regulation of stomatal complex development	BP				0.0186697
GO:0048830	adventitious root development	BP							0.0301622
GO:0009729	detection of brassinosteroid stimulus	BP			0.0188078		0.0318636
GO:0051741	2-methyl-6-phytyl-1,4-benzoquinone methyltransferase activity	MF			0.0368549	0.0191949
GO:0033764	steroid dehydrogenase activity, acting on the CH-OH group of donors, NAD or NADP as acceptor	MF								0.0191986	0.044566
GO:0009113	purine nucleobase biosynthetic process	BP				0.0365716
GO:0005731	nucleolus organizer region	CC							0.0194748
GO:0072718	response to cisplatin	BP								0.0197147
GO:0071322	cellular response to carbohydrate stimulus	BP			0.0197156
GO:2000377	regulation of reactive oxygen species metabolic process	BP				0.0217645
GO:0003872	6-phosphofructokinase activity	MF							0.0324967	0.0202003	0.0408091
GO:0004076	biotin synthase activity	MF				0.0203449
GO:0004044	amidophosphoribosyltransferase activity	MF				0.0274489
GO:0071248	cellular response to metal ion	BP			0.041615
GO:0010350	cellular response to magnesium starvation	BP			0.0211111
GO:0071286	cellular response to magnesium ion	BP			0.0211111
GO:0004459	L-lactate dehydrogenase activity	MF			0.0211538
GO:0042541	hemoglobin biosynthetic process	BP			0.0258244
GO:0006152	purine nucleoside catabolic process	BP				0.0248899
GO:0016002	sulfite reductase activity	MF								0.0213298
GO:0019419	sulfate reduction	BP								0.0213298
GO:0019424	sulfide oxidation, using siroheme sulfite reductase	BP								0.0213298
GO:0050311	sulfite reductase (ferredoxin) activity	MF								0.0213298
GO:0008898	S-adenosylmethionine-homocysteine S-methyltransferase activity	MF			0.0474545
GO:0033528	S-methylmethionine cycle	BP			0.0474545
GO:0019521	D-gluconate metabolic process	BP			0.0259677
GO:0033356	UDP-L-arabinose metabolic process	BP			0.0334444
GO:0003400	regulation of COPII vesicle coating	BP			0.0489232
GO:0003919	FMN adenylyltransferase activity	MF				0.0215568
GO:0016323	basolateral plasma membrane	CC								0.0220055
GO:0034635	glutathione transport	BP			0.0269904
GO:0030018	Z disc	CC			0.0222937
GO:0017057	6-phosphogluconolactonase activity	MF				0.022343
GO:0010107	potassium ion import	BP								0.0226282
GO:0005358	high-affinity hydrogen:glucose symporter activity	MF			0.0275731
GO:2000008	regulation of protein localization to cell surface	BP								0.0229582
GO:0006556	S-adenosylmethionine biosynthetic process	BP			0.0492896
GO:0004306	ethanolamine-phosphate cytidylyltransferase activity	MF			0.0281002
GO:0038199	ethylene receptor activity	MF				0.0367823
GO:0050463	nitrate reductase [NAD(P)H] activity	MF			0.0283058
GO:0016150	translation release factor activity, codon nonspecific	MF			0.0238198
GO:0015662	ATPase activity, coupled to transmembrane movement of ions, phosphorylative mechanism	MF							0.0238395
GO:0005385	zinc ion transmembrane transporter activity	MF			0.0324719		0.0396574			0.0238942
GO:0016754	sinapoylglucose-malate O-sinapoyltransferase activity	MF			0.0239303
GO:0006127	glycerophosphate shuttle	BP				0.0240288
GO:0007064	mitotic sister chromatid cohesion	BP					0.0240514
GO:0017153	sodium:dicarboxylate symporter activity	MF					0.0245246
GO:0031344	regulation of cell projection organization	BP					0.024537
GO:0007143	female meiotic division	BP							0.0245506
GO:0031000	response to caffeine	BP			0.0245632
GO:0010942	positive regulation of cell death	BP									0.0438466
GO:0061615	glycolytic process through fructose-6-phosphate	BP							0.035781	0.0259328
GO:0052636	arabinosyltransferase activity	MF					0.0259452
GO:0004450	isocitrate dehydrogenase (NADP+) activity	MF			0.0259664	0.0407247
GO:0001077	transcriptional activator activity, RNA polymerase II core promoter proximal region sequence-specific binding	MF									0.0495457
GO:0043627	response to estrogen	BP			0.0479432
GO:0006090	pyruvate metabolic process	BP					0.0263947
GO:0019516	lactate oxidation	BP			0.0460075
GO:0015095	magnesium ion transmembrane transporter activity	MF			0.0408508
GO:0071987	WD40-repeat domain binding	MF					0.0265959
GO:0047681	aryl-alcohol dehydrogenase (NADP+) activity	MF					0.0435897			0.0358882
GO:1903959	regulation of anion transmembrane transport	BP								0.036191
GO:1902584	positive regulation of response to water deprivation	BP				0.0443127
GO:0004616	phosphogluconate dehydrogenase (decarboxylating) activity	MF			0.0274407
GO:0008142	oxysterol binding	MF			0.0274455
GO:0051669	fructan beta-fructosidase activity	MF									0.0275593
GO:0010042	response to manganese ion	BP									0.0282162
GO:0015421	oligopeptide-transporting ATPase activity	MF			0.0284439
GO:0035672	oligopeptide transmembrane transport	BP			0.0284439
GO:0033744	L-methionine:thioredoxin-disulfide S-oxidoreductase activity	MF								0.0287617
GO:0009930	longitudinal side of cell surface	CC				0.0435542
GO:0016041	glutamate synthase (ferredoxin) activity	MF					0.0289139
GO:0080114	positive regulation of glycine hydroxymethyltransferase activity	BP					0.0289139
GO:0043325	phosphatidylinositol-3,4-bisphosphate binding	MF			0.0429987
GO:0008195	phosphatidate phosphatase activity	MF								0.0331413
GO:0034613	cellular protein localization	BP								0.0292915
GO:0005911	cell-cell junction	CC					0.0459374
GO:0055046	microgametogenesis	BP							0.0296363
GO:0071284	cellular response to lead ion	BP			0.0298849
GO:0004703	G-protein coupled receptor kinase activity	MF				0.0301696
GO:0042406	extrinsic component of endoplasmic reticulum membrane	CC									0.0302371
GO:0001944	vasculature development	BP					0.0445044			0.0303518
GO:2000037	regulation of stomatal complex patterning	BP								0.0303582
GO:0016410	N-acyltransferase activity	MF			0.0303633
GO:0004751	ribose-5-phosphate isomerase activity	MF							0.0305511
GO:0010274	hydrotropism	BP			0.0305598
GO:0045551	cinnamyl-alcohol dehydrogenase activity	MF			0.0307353
GO:0045815	positive regulation of gene expression, epigenetic	BP				0.0308007
GO:0004145	diamine N-acetyltransferase activity	MF					0.0308854
GO:0071805	potassium ion transmembrane transport	BP								0.0308999	0.036874
GO:0019888	protein phosphatase regulator activity	MF				0.0313231
GO:0006555	methionine metabolic process	BP					0.0449575			0.0314216
GO:0004525	ribonuclease III activity	MF							0.0315569
GO:0000159	protein phosphatase type 2A complex	CC				0.0318609
GO:0043266	regulation of potassium ion transport	BP								0.0386649
GO:0047890	flavanone 4-reductase activity	MF								0.0320901
GO:0033730	arogenate dehydrogenase (NADP+) activity	MF			0.038922
GO:0047794	cyclohexadienyl dehydrogenase activity	MF			0.038922
GO:0009836	fruit ripening, climacteric	BP					0.0476821			0.0393844
GO:0018108	peptidyl-tyrosine phosphorylation	BP			0.0393589						0.0323457
GO:0009901	anther dehiscence	BP								0.0324644
GO:0007584	response to nutrient	BP			0.0326044
GO:0010365	positive regulation of ethylene biosynthetic process	BP					0.0397909			0.0327807
GO:0009623	response to parasitic fungus	BP				0.0330143
GO:0046839	phospholipid dephosphorylation	BP									0.0330462
GO:1902000	homogentisate catabolic process	BP								0.0391154
GO:0018008	N-terminal peptidyl-glycine N-myristoylation	BP					0.0403258			0.033218
GO:0051365	cellular response to potassium ion starvation	BP								0.0415576
GO:1990135	flavonoid sulfotransferase activity	MF									0.0336197
GO:0016301	kinase activity	MF				0.0336539
GO:0004713	protein tyrosine kinase activity	MF									0.0338495
GO:0009821	alkaloid biosynthetic process	BP			0.0411265
GO:0005985	sucrose metabolic process	BP				0.034176
GO:0047066	phospholipid-hydroperoxide glutathione peroxidase activity	MF			0.0347215
GO:0031432	titin binding	MF			0.0359009
GO:0031996	thioesterase binding	MF			0.0359009
GO:0031997	N-terminal myristoylation domain binding	MF			0.0359009
GO:0043274	phospholipase binding	MF			0.0359009
GO:0033169	histone H3-K9 demethylation	BP							0.0364047
GO:0042060	wound healing	BP									0.0366015
GO:0042762	regulation of sulfur metabolic process	BP								0.038854
GO:0016034	maleylacetoacetate isomerase activity	MF									0.0367546
GO:0015976	carbon utilization	BP				0.037278
GO:0006665	sphingolipid metabolic process	BP			0.0390736
GO:0009783	photosystem II antenna complex	CC			0.0373446
GO:0009831	plant-type cell wall modification involved in multidimensional cell growth	BP				0.0432749
GO:0000380	alternative mRNA splicing, via spliceosome	BP				0.0376353
GO:0050660	flavin adenine dinucleotide binding	MF									0.0376758
GO:2000505	regulation of energy homeostasis	BP			0.0459513
GO:0019139	cytokinin dehydrogenase activity	MF								0.0380875
GO:0009521	photosystem	CC					0.0463768			0.0383369
GO:0018454	acetoacetyl-CoA reductase activity	MF			0.0464352
GO:0045703	ketoreductase activity	MF			0.0464352
GO:0016530	metallochaperone activity	MF								0.0385505
GO:0004471	malate dehydrogenase (decarboxylating) (NAD+) activity	MF								0.0486801	0.0458974
GO:0006729	tetrahydrobiopterin biosynthetic process	BP				0.0386935
GO:0051176	positive regulation of sulfur metabolic process	BP					0.047621			0.039196
GO:0030414	peptidase inhibitor activity	MF			0.0397184
GO:0004411	homogentisate 1,2-dioxygenase activity	MF								0.0398488
GO:0043813	phosphatidylinositol-3,5-bisphosphate 5-phosphatase activity	MF									0.0399287
GO:0000237	leptotene	BP									0.0401349
GO:0000238	zygotene	BP									0.0401349
GO:0051938	L-glutamate import	BP				0.0404349
GO:0010236	plastoquinone biosynthetic process	BP				0.0468166
GO:0033120	positive regulation of RNA splicing	BP								0.0413378
GO:0000481	maturation of 5S rRNA	BP					0.0485657
GO:0019236	response to pheromone	BP									0.0421222
GO:0010491	UTP:arabinose-1-phosphate uridylyltransferase activity	MF								0.0424108
GO:0019585	glucuronate metabolic process	BP								0.0424108
GO:0046398	UDP-glucuronate metabolic process	BP								0.0424108
GO:0047338	UTP:xylose-1-phosphate uridylyltransferase activity	MF								0.0424108
GO:0047350	glucuronate-1-phosphate uridylyltransferase activity	MF								0.0424108
GO:0052573	UDP-D-galactose metabolic process	BP								0.0424108
GO:0017001	antibiotic catabolic process	BP									0.0425278
GO:0052694	jasmonoyl-isoleucine-12-hydroxylase activity	MF									0.0426712
GO:0015700	arsenite transport	BP								0.0427378
GO:0005547	phosphatidylinositol-3,4,5-trisphosphate binding	MF			0.0429987
GO:0010597	green leaf volatile biosynthetic process	BP									0.0433172
GO:0007518	myoblast fate determination	BP								0.0435242
GO:0007527	adult somatic muscle development	BP								0.0435242
GO:0061629	RNA polymerase II sequence-specific DNA binding transcription factor binding	MF								0.0435242
GO:0010059	positive regulation of atrichoblast fate specification	BP								0.0435275
GO:0010063	positive regulation of trichoblast fate specification	BP								0.0435275
GO:0032586	protein storage vacuole membrane	CC								0.0435275
GO:0051177	meiotic sister chromatid cohesion	BP								0.0435275
GO:0060215	primitive hemopoiesis	BP								0.0435275
GO:0070054	mRNA splicing, via endonucleolytic cleavage and ligation	BP								0.0435275
GO:0010064	embryonic shoot morphogenesis	BP								0.0437366
GO:0030389	fructosamine metabolic process	BP									0.0438459
GO:0033969	gamma-glutamyl-gamma-aminobutyrate hydrolase activity	MF									0.0443078
GO:0050870	positive regulation of T cell activation	BP									0.0445466
GO:0008465	glycerate dehydrogenase activity	MF									0.0455309
GO:1990482	sphingolipid alpha-glucuronosyltransferase activity	MF									0.0458972
GO:0004168	dolichol kinase activity	MF									0.0460752
GO:0043048	dolichyl monophosphate biosynthetic process	BP									0.0460752
GO:0019567	arabinose biosynthetic process	BP									0.0461551
GO:0035587	purinergic receptor signaling pathway	BP									0.0461584
GO:1990003	IDP phosphatase activity	MF									0.0461584
GO:0031362	anchored component of external side of plasma membrane	CC									0.0461672
GO:0036257	multivesicular body organization	BP									0.0461672
GO:0009244	lipopolysaccharide core region biosynthetic process	BP									0.0461672
GO:0009671	nitrate:proton symporter activity	MF									0.0461672
GO:0009019	tRNA (guanine-N1-)-methyltransferase activity	MF									0.0461672
GO:0047568	3-oxo-5-beta-steroid 4-dehydrogenase activity	MF								0.047185
GO:0047787	delta4-3-oxosteroid 5beta-reductase activity	MF								0.047185
GO:0007169	transmembrane receptor protein tyrosine kinase signaling pathway	BP									0.0472065
GO:0033925	mannosyl-glycoprotein endo-beta-N-acetylglucosaminidase activity	MF					0.0474563
GO:0043178	alcohol binding	MF			0.0474568
GO:1900150	regulation of defense response to fungus	BP					0.0476968
GO:0031053	primary miRNA processing	BP								0.0478663
GO:0003876	AMP deaminase activity	MF								0.0482374
GO:0009940	amino-terminal vacuolar sorting propeptide binding	MF				0.0484022					0.0495447
GO:0008236	serine-type peptidase activity	MF			0.0485235
GO:0051740	ethylene binding	MF				0.0487235
GO:0051649	establishment of localization in cell	BP				0.0488786
