# Supplementary material for: Flavonoids Modulate the Accumulation of Toxins From Aspergillus flavus in Maize Kernels
Source: Front Plant Sci. 2021 Nov 26;12:761446. doi: 10.3389/fpls.2021.761446 (PMC8662736; doi:10.3389/fpls.2021.761446)
Supplement: Supplementary file 3 [file Table_5.xlsx]

## Sheet: flavonoid_pathway_genes
Supplemental table 5. Flavonoid pathway genes used for heatmaps.
Gene ID	Enzymatic activity - CornCyc	Gene function - MaizeGDB
Zm00001d032103	4-coumarate-CoA ligase	4-coumarate--CoA ligase 1
Zm00001d051529	4-coumarate-CoA ligase	Putative AMP-dependent synthetase and ligase superfamily protein
Zm00001d015459	4-coumarate-CoA ligase	cml1;coumarate ligase1:
Zm00001d032107	4-coumarate-CoA ligase	4-coumarate--CoA ligase-like 7
Zm00001d011163	4-coumarate-CoA ligase
Zm00001d015025	4-coumarate-CoA ligase	AMP binding protein
Zm00001d048446	4-coumarate-CoA ligase	Putative AMP-dependent synthetase and ligase superfamily protein
Zm00001d037318	4-coumarate-CoA ligase	Putative AMP-dependent synthetase and ligase superfamily protein
Zm00001d050224	4-coumarate-CoA ligase	4-coumarate--CoA ligase 1
Zm00001d027534	4-coumarate-CoA ligase	Probable acyl-activating enzyme 1 peroxisomal
Zm00001d045679	4-coumarate-CoA ligase	Probable acyl-activating enzyme 5 peroxisomal
Zm00001d027535	4-coumarate-CoA ligase	Probable acyl-activating enzyme 1 peroxisomal
Zm00001d027499	4-coumarate-CoA ligase	Acyl-activating enzyme 11
Zm00001d052096	4-coumarate-CoA ligase
Zm00001d046915	4-coumarate-CoA ligase	Putative AMP-dependent synthetase and ligase superfamily protein
Zm00001d001849	4-coumarate-CoA ligase	Probable acyl-activating enzyme 5 peroxisomal
Zm00001d003525	chalcone reductase	NAD(P)-linked oxidoreductase superfamily protein
Zm00001d040483	naringenin-chalcone synthase	Type III polyketide synthase B
Zm00001d013991	naringenin-chalcone synthase	Type III polyketide synthase A
Zm00001d007403	naringenin-chalcone synthase	Chalcone synthase WHP1
Zm00001d032662	naringenin-chalcone synthase	Type III polyketide synthase A
Zm00001d052673	naringenin-chalcone synthase	Chalcone synthase C2
Zm00001d052676	naringenin-chalcone synthase	Type III polyketide synthase B
Zm00001d044683	chalcone isomerase	Probable chalcone--flavonone isomerase 3
Zm00001d016144	chalcone isomerase	Chalcone isomerase 3
Zm00001d000357	chalcone isomerase	Fatty-acid-binding protein 2
Zm00001d012972	chalcone isomerase	chi3;chalcone flavanone isomerase3: Similar to chi1; expressed in various tissues, but not root, embryo, or internode (Sekhon et al 2011)
Zm00001d034635	chalcone isomerase	chi1;chalcone flavanone isomerase1: genomic sequence, gene-specific probe, transcript defined by S1-nuclease protection analysis
Zm00001d006630	chalcone isomerase	Chalcone isomerase
Zm00001d018278	chalcone isomerase	Fatty-acid-binding protein 2
Zm00001d001924	flavanone 3-dioxygenase	KAR-UP oxidoreductase 1
Zm00001d033327	flavanone 3-dioxygenase	2-oxoglutarate (2OG) and Fe(II)-dependent oxygenase superfamily protein
Zm00001d001927	flavanone 3-dioxygenase	Flavonol synthase/flavanone 3-hydroxylase
Zm00001d049926	flavanone 3-dioxygenase	Gibberellin 20 oxidase 2
Zm00001d029744	flavanone 3-dioxygenase	fnsi1;flavone synthase typeI1: Encodes a flavone synthase that is of the soluble Fe2+/2- oxoglutarate-dependent dioxygenase class
Zm00001d013725	flavanone 3-dioxygenase	ga20ox4;gibberellin 20-oxidase4:
Zm00001d027423	flavanone 3-dioxygenase	fnsi2;flavone synthase typeI2: Encodes a flavone synthase that is of the soluble Fe2+/2- oxoglutarate-dependent dioxygenase class
Zm00001d052999	flavanone 3-dioxygenase	2-oxoglutarate (2OG) and Fe(II)-dependent oxygenase superfamily protein
Zm00001d032223	flavanone 3-dioxygenase	Gibberellin 20 oxidase 2
Zm00001d031926	flavanone 3-dioxygenase	2-oxoglutarate (2OG) and Fe(II)-dependent oxygenase superfamily protein
Zm00001d026003	flavanone 3-dioxygenase	AT5G24530 (E=4e-036) DMR6 | DMR6 (DOWNY MILDEW RESISTANT 6); oxidoreductase/ oxidoreductase acting on paired donors with incorporation or reduction of molecular oxygen 2-oxoglutarate as one donor and incorporation of one atom each of oxygen into both donors
Zm00001d026431	flavanone 3-dioxygenase	OSJNBa0033G05.6 protein; OSJNBa0063C18.20 protein; protein
Zm00001d002564	flavanone 3-dioxygenase	Protein DMR6-LIKE OXYGENASE 2
Zm00001d045141	flavanone 3-dioxygenase	2-oxoglutarate (2OG) and Fe(II)-dependent oxygenase superfamily protein
Zm00001d002100	flavanone 3-dioxygenase	OSJNBa0033G05.6 protein; OSJNBa0063C18.20 protein; protein
Zm00001d037487	flavanone 3-dioxygenase	2-oxoglutarate (2OG) and Fe(II)-dependent oxygenase superfamily protein
Zm00001d001960	flavanone 3-dioxygenase	Naringenin2-oxoglutarate 3-dioxygenase
